# Supplementary material for: Exploring the Phenotypic Space and the Evolutionary History of a Natural Mutation in Drosophila melanogaster
Source: PubMed Central journal article supplement — Mol Biol Evol. 2015 Apr 9;32(7):1800–14. doi: 10.1093/molbev/msv061 (PMC4476160; doi:10.1093/molbev/msv061), 2015-04-09
Supplement: supp_msv061_SupplementaryTables.pdf [file supp_msv061_SupplementaryTables.pdf]

**Table S1.** Sliding windows analysis of the 2kb region flanking *FBti0019386* insertion (1kb on each side).

| <b>Chr.start</b> | <b>Chr.end</b> | <b>Tajima's D</b>   |                     | <b>Nucleotide diversity</b> |                     |
|------------------|----------------|---------------------|---------------------|-----------------------------|---------------------|
|                  |                | <i>FBti0019386+</i> | <i>FBti0019386-</i> | <i>FBti0019386+</i>         | <i>FBti0019386-</i> |
| 12014186         | 12014385       | -0.44               | 0.09                | 0.56                        | 1.90                |
| 12014386         | 12014585       | -1.25               | -0.68               | 0.46                        | 0.71                |
| 12014586         | 12014785       | -1.57               | -0.38               | 0.05                        | 0.84                |
| 12014786         | 12014985       | -0.87               | -0.02               | 0.15                        | 1.21                |
| 12014986         | 12015186       | -0.82               | 0.21                | 0.05                        | 1.12                |
| 12015532         | 12015731       | -1.55               | 1.26                | 0.22                        | 1.60                |
| 12015732         | 12015931       | -0.67               | 1.19                | 0.62                        | 1.85                |
| 12015932         | 12016131       | 1.72                | -0.77               | 0.47                        | 0.98                |
| 12016132         | 12016331       | -1.39               | -1.10               | 0.20                        | 1.06                |
| 12016332         | 12016532       | -1.44               | -0.23               | 0.27                        | 1.10                |

**Table S2.** Results of simulations under a neutral model using MS program, with theta parameter=5 for flies with the element (*FBti0019386 +*) and flies without the element (*FBti0019386 -*) datasets in a region of 1 kb around the TE insertion.

|                      |           | Observed   | P-value | Neutral simulations |           |          |          |              |               |
|----------------------|-----------|------------|---------|---------------------|-----------|----------|----------|--------------|---------------|
|                      |           |            |         | Valid N             | Mean      | Minimum  | Maximum  | Percentile 5 | Percentile 95 |
| <i>FBti0019386 +</i> | Tajima'sD | -1.7743102 | 0.0160  | 1000                | -0.094790 | -2.28808 | 2.783320 | -1.43645     | 1.594586      |
|                      | nucl.div  | 0.4332737  | <0.001  | 1000                | 5.038808  | 0.773882 | 22.29469 | 1.708646     | 10.17030      |
|                      | CL (log)  | -5.95      | <0.001  | 1000                | -24.3104  | -56.5700 | -6.78000 | -38.1700     | -12.3400      |
| <i>FBti0019386 -</i> | Tajima'sD | 0.6775646  | >0.05   | 1000                | -0.096610 | -2.14222 | 2.585194 | -1.41546     | 1.590358      |
|                      | nucl.div  | 4.5140351  | >0.05   | 1000                | 4.953185  | 0.437544 | 16.16000 | 1.751053     | 10.19860      |
|                      | CL (log)  | -18.15     | >0.05   | 1000                | -19.6168  | -43.7300 | -3.51000 | -32.7450     | -8.95000      |

**Table S3.** Statistics estimated in the 1000 datasets obtained by randomization of strains keeping the same proportion of the strains with and without the element.

| <b>dataset</b> | <b>CL</b> | <b>log(CL)</b> | <b>Tajima D</b> | <b><math>\pi</math></b> |
|----------------|-----------|----------------|-----------------|-------------------------|
| 1              | 5.90E-12  | -11.229313     | 0.8235081       | 3.797123                |
| 2              | 3.55E-15  | -14.44944      | -0.1670349      | 3.216816                |
| 3              | 1.94E-10  | -9.7126312     | 0.21460617      | 2.785239                |
| 4              | 1.56E-13  | -12.808249     | 0.27298718      | 3.352201                |
| 5              | 2.42E-08  | -7.6157158     | 0.82448776      | 2.997203                |
| 6              | 1.07E-13  | -12.972461     | 0.70823342      | 4.061495                |
| 7              | 8.45E-13  | -12.073024     | 1.26670688      | 4.001695                |
| 8              | 1.56E-13  | -12.808249     | 0.11532612      | 3.119774                |
| 9              | 5.76E-15  | -14.239613     | 0.58744939      | 3.480829                |
| 10             | 8.45E-13  | -12.073024     | 0.41540641      | 3.185876                |
| 11             | 1.43E-12  | -11.84578      | 0.29438122      | 3.012121                |
| 12             | 5.41E-11  | -10.266844     | 0.61799472      | 3.302458                |
| 13             | 3.55E-15  | -14.44944      | 0.13584718      | 3.561608                |
| 14             | 2.66E-14  | -13.574521     | 0.21921987      | 3.310996                |
| 15             | 2.66E-14  | -13.574521     | 0.05058662      | 3.206061                |
| 16             | 4.13E-11  | -10.384354     | 0.59262359      | 3.278314                |
| 17             | 5.71E-12  | -11.24372      | 0.65259945      | 3.269474                |
| 18             | 3.85E-11  | -10.414416     | 0.40631308      | 3.137401                |
| 19             | 1.83E-12  | -11.738279     | -0.4277619      | 2.732946                |
| 20             | 3.34E-17  | -16.475968     | 0.06155533      | 3.601242                |
| 21             | 2.30E-14  | -13.637553     | 0.64237548      | 3.634585                |
| 22             | 1.01E-12  | -11.995585     | 0.71481474      | 3.988701                |
| 23             | 3.55E-15  | -14.44944      | 0.22382834      | 3.686441                |
| 24             | 2.53E-15  | -14.597012     | 0.6030543       | 4.023266                |
| 25             | 1.01E-14  | -13.994952     | 0.26938517      | 3.604851                |
| 26             | 8.45E-13  | -12.073024     | 0.47907708      | 3.246893                |
| 27             | 1.05E-12  | -11.978945     | 0.60661451      | 3.576885                |
| 28             | 3.85E-11  | -10.414416     | 0.85970978      | 3.5147                  |
| 29             | 6.06E-09  | -8.2177758     | 1.21843182      | 3.324942                |
| 30             | 3.55E-15  | -14.44944      | -0.0259769      | 3.332401                |
| 31             | 1.43E-12  | -11.84578      | 0.82062707      | 3.553146                |
| 32             | 6.22E-13  | -12.206189     | 0.67898357      | 3.629837                |
| 33             | 1.50E-15  | -14.824256     | 0.24455025      | 3.685352                |
| 34             | 3.65E-10  | -9.4375399     | 0.47367056      | 3.263158                |
| 35             | 4.09E-08  | -7.388472      | 0.5119349       | 2.824026                |
| 36             | 2.14E-15  | -14.669788     | 0.15736122      | 3.73705                 |
| 37             | 3.79E-10  | -9.4218958     | 0.36990539      | 2.604039                |
| 38             | 4.85E-11  | -10.314691     | 1.00641645      | 3.402546                |
| 39             | 7.18E-12  | -11.143995     | 0.83076601      | 3.299313                |
| 40             | 3.89E-14  | -13.410309     | 0.39565522      | 3.342657                |
| 41             | 1.94E-10  | -9.7126312     | 0.83120533      | 3.263403                |

---

|    |          |            |            |          |
|----|----------|------------|------------|----------|
| 42 | 4.57E-13 | -12.340339 | -0.0688167 | 3.039337 |
| 43 | 3.75E-16 | -15.426316 | 0.2547472  | 3.629061 |
| 44 | 9.22E-14 | -13.035493 | 0.92413619 | 3.878322 |
| 45 | 4.20E-12 | -11.376885 | 0.36138798 | 3.327877 |
| 46 | 1.84E-09 | -8.7357549 | 1.3499977  | 3.74504  |
| 47 | 1.58E-14 | -13.801765 | -0.195301  | 2.962302 |
| 48 | 1.15E-10 | -9.9398751 | 0.44993913 | 2.875587 |
| 49 | 1.58E-14 | -13.801765 | 0.084436   | 3.203313 |
| 50 | 4.85E-11 | -10.314691 | 1.10396651 | 3.563842 |
| 51 | 7.18E-12 | -11.143995 | 0.56291425 | 2.991304 |
| 52 | 1.94E-10 | -9.7126312 | 0.85323799 | 3.266023 |
| 53 | 1.79E-12 | -11.746055 | 1.18963955 | 3.565847 |
| 54 | 5.71E-12 | -11.24372  | 0.43088248 | 3.180328 |
| 55 | 7.18E-12 | -11.143995 | 0.79730766 | 3.288701 |
| 56 | 5.64E-17 | -16.248724 | -0.0795204 | 3.454785 |
| 57 | 1.54E-10 | -9.8123561 | 0.44153628 | 3.232305 |
| 58 | 1.68E-11 | -10.774825 | 0.13860677 | 3.143503 |
| 59 | 6.00E-15 | -14.222196 | 0.47601221 | 4.000605 |
| 60 | 3.69E-13 | -12.433433 | 0.69462182 | 3.645688 |
| 61 | 3.75E-16 | -15.426316 | 0.35458249 | 3.835593 |
| 62 | 2.62E-13 | -12.581005 | -0.1273064 | 2.812587 |
| 63 | 2.26E-16 | -15.646664 | -0.1657208 | 3.310642 |
| 64 | 8.88E-16 | -15.0515   | -0.325746  | 3.08409  |
| 65 | 4.59E-10 | -9.337815  | 0.57113254 | 3.048611 |
| 66 | 6.22E-13 | -12.206189 | 0.20734012 | 3.213559 |
| 67 | 3.69E-13 | -12.433433 | 0.77827037 | 3.79548  |
| 68 | 1.50E-15 | -14.824256 | 0.15079809 | 3.511414 |
| 69 | 1.47E-12 | -11.831373 | 0.24170571 | 3.206349 |
| 70 | 2.53E-15 | -14.597012 | 0.17422824 | 3.581845 |
| 71 | 4.20E-12 | -11.376885 | 0.56804048 | 3.558964 |
| 72 | 2.28E-11 | -10.64166  | 1.02347141 | 3.688323 |
| 73 | 4.32E-08 | -7.3645163 | 0.15564298 | 2.264972 |
| 74 | 6.00E-15 | -14.222196 | -0.0707918 | 3.281585 |
| 75 | 7.18E-12 | -11.143995 | 0.35753312 | 2.840559 |
| 76 | 2.28E-11 | -10.64166  | 0.01952139 | 2.750117 |
| 77 | 2.24E-10 | -9.6491396 | 0.62208249 | 2.861449 |
| 78 | 4.20E-12 | -11.376885 | 0.55893698 | 3.508159 |
| 79 | 3.38E-12 | -11.470964 | 0.80273633 | 3.557062 |
| 80 | 3.55E-15 | -14.44944  | 0.51307238 | 4.016384 |
| 81 | 3.74E-14 | -13.426949 | 0.11223464 | 3.293155 |
| 82 | 1.94E-10 | -9.7126312 | 0.99565894 | 3.376398 |
| 83 | 5.90E-12 | -11.229313 | 0.21413921 | 3.121739 |
| 84 | 4.59E-10 | -9.337815  | 1.00660914 | 3.437996 |
| 85 | 1.94E-10 | -9.7126312 | 0.42160423 | 2.93284  |
| 86 | 2.28E-11 | -10.64166  | 0.48063711 | 3.227922 |

---

---

|     |          |            |            |          |
|-----|----------|------------|------------|----------|
| 87  | 3.75E-16 | -15.426316 | 0.20782261 | 3.55528  |
| 88  | 5.64E-17 | -16.248724 | 0.24214847 | 3.861072 |
| 89  | 2.87E-11 | -10.541935 | 0.84739479 | 3.277855 |
| 90  | 2.28E-11 | -10.64166  | 0.26138021 | 2.999008 |
| 91  | 2.14E-15 | -14.669788 | 0.05936358 | 3.577856 |
| 92  | 2.11E-13 | -12.675084 | 0.5223665  | 3.146316 |
| 93  | 8.45E-13 | -12.073024 | 0.71791969 | 3.415851 |
| 94  | 3.85E-11 | -10.414416 | 0.72111352 | 3.437996 |
| 95  | 1.94E-10 | -9.7126312 | 0.51370991 | 3.015336 |
| 96  | 1.07E-13 | -12.972461 | 0.19553048 | 3.303599 |
| 97  | 8.45E-13 | -12.073024 | 0.29758708 | 2.964397 |
| 98  | 1.07E-13 | -12.972461 | 0.06094805 | 3.125263 |
| 99  | 2.26E-16 | -15.646664 | -0.0440309 | 3.61948  |
| 100 | 1.07E-13 | -12.972461 | -0.2294247 | 2.992136 |
| 101 | 2.53E-15 | -14.597012 | 0.40171985 | 3.774327 |
| 102 | 3.69E-13 | -12.433433 | 0.67668383 | 3.627506 |
| 103 | 4.20E-12 | -11.376885 | 0.07727958 | 2.934035 |
| 104 | 1.07E-13 | -12.972461 | -0.3358119 | 2.791142 |
| 105 | 2.53E-13 | -12.597645 | 0.24278094 | 3.354069 |
| 106 | 2.62E-13 | -12.581005 | 0.29808452 | 3.224759 |
| 107 | 1.94E-10 | -9.7126312 | 0.81372005 | 3.214493 |
| 108 | 2.53E-15 | -14.597012 | 0.00432936 | 3.305947 |
| 109 | 2.53E-15 | -14.597012 | -0.2492292 | 3.079254 |
| 110 | 3.95E-15 | -14.403825 | -0.1083576 | 3.015803 |
| 111 | 7.19E-13 | -12.143158 | 0.45287336 | 3.682179 |
| 112 | 3.95E-15 | -14.403825 | -0.0549024 | 3.134849 |
| 113 | 1.50E-15 | -14.824256 | -0.0432031 | 3.334821 |
| 114 | 6.00E-15 | -14.222196 | 0.27251523 | 3.670862 |
| 115 | 3.27E-10 | -9.4853874 | 0.62870669 | 3.034429 |
| 116 | 4.26E-13 | -12.370401 | 0.62678747 | 3.803775 |
| 117 | 2.40E-14 | -13.620136 | 0.03958285 | 3.365217 |
| 118 | 9.22E-14 | -13.035493 | 0.56403689 | 3.493854 |
| 119 | 6.06E-09 | -8.2177758 | 0.86418173 | 3.119481 |
| 120 | 1.80E-11 | -10.744762 | 0.66078628 | 3.591747 |
| 121 | 3.89E-14 | -13.410309 | 0.32390323 | 3.26993  |
| 122 | 3.38E-12 | -11.470964 | 0.31592484 | 3.051091 |
| 123 | 9.44E-11 | -10.025193 | -0.0054748 | 2.955357 |
| 124 | 5.41E-11 | -10.266844 | 1.01929082 | 3.722718 |
| 125 | 6.31E-14 | -13.199705 | 0.63496009 | 3.833566 |
| 126 | 3.75E-16 | -15.426316 | 0.36218596 | 3.690115 |
| 127 | 1.65E-10 | -9.7822937 | 1.06907513 | 3.750583 |
| 128 | 2.28E-11 | -10.64166  | 0.82698329 | 3.519814 |
| 129 | 6.31E-14 | -13.199705 | -0.175894  | 2.88967  |
| 130 | 1.07E-13 | -12.972461 | -0.3870417 | 2.776838 |
| 131 | 2.24E-10 | -9.6491396 | 1.00899944 | 3.167163 |

---

---

|     |          |            |            |          |
|-----|----------|------------|------------|----------|
| 132 | 1.21E-11 | -10.916751 | 0.45610353 | 2.881064 |
| 133 | 9.22E-14 | -13.035493 | 0.35210534 | 3.226583 |
| 134 | 3.95E-15 | -14.403825 | 0.02323482 | 3.17669  |
| 135 | 2.53E-13 | -12.597645 | 0.24795225 | 3.397717 |
| 136 | 2.16E-10 | -9.6647837 | 0.53256047 | 3.239161 |
| 137 | 1.05E-12 | -11.978945 | 0.12558127 | 2.998519 |
| 138 | 6.09E-15 | -14.2153   | -0.3136064 | 3.220238 |
| 139 | 9.35E-15 | -14.029009 | 0.43351162 | 3.576812 |
| 140 | 1.50E-13 | -12.824889 | 0.03018131 | 3.184149 |
| 141 | 9.63E-12 | -11.016476 | 0.47566164 | 3.223162 |
| 142 | 1.94E-10 | -9.7126312 | 0.51016919 | 3.031073 |
| 143 | 4.20E-12 | -11.376885 | 0.43612834 | 3.40377  |
| 144 | 2.49E-12 | -11.604129 | 0.60286877 | 3.594395 |
| 145 | 8.97E-10 | -9.0470796 | 0.99403892 | 3.171867 |
| 146 | 5.71E-12 | -11.24372  | 0.2997674  | 3.096189 |
| 147 | 9.22E-14 | -13.035493 | 0.83822475 | 3.698947 |
| 148 | 9.35E-15 | -14.029009 | 0.64019759 | 3.77856  |
| 149 | 9.95E-12 | -11.002069 | -0.0628818 | 2.859526 |
| 150 | 1.94E-10 | -9.7126312 | 0.53407516 | 2.981563 |
| 151 | 1.15E-10 | -9.9398751 | 0.22279505 | 2.72028  |
| 152 | 1.35E-11 | -10.868904 | 0.69735035 | 3.477919 |
| 153 | 3.95E-15 | -14.403825 | 0.03363356 | 3.130673 |
| 154 | 3.75E-16 | -15.426316 | 0.33270904 | 3.717296 |
| 155 | 1.50E-13 | -12.824889 | -0.107236  | 3.057044 |
| 156 | 4.20E-12 | -11.376885 | 0.53193171 | 3.46137  |
| 157 | 1.05E-12 | -11.978945 | 0.54496036 | 3.455901 |
| 158 | 2.66E-14 | -13.574521 | -0.3288654 | 2.798601 |
| 159 | 1.94E-10 | -9.7126312 | 0.39139443 | 2.887897 |
| 160 | 3.79E-10 | -9.4218958 | 0.71828691 | 2.959322 |
| 161 | 1.50E-15 | -14.824256 | 0.3034645  | 3.728671 |
| 162 | 3.69E-13 | -12.433433 | -0.0162291 | 2.872066 |
| 163 | 1.56E-13 | -12.808249 | 0.35422994 | 3.363277 |
| 164 | 3.69E-13 | -12.433433 | 0.51585466 | 3.426501 |
| 165 | 5.71E-12 | -11.24372  | 0.39426753 | 3.089552 |
| 166 | 3.81E-16 | -15.41942  | -0.0900951 | 3.511898 |
| 167 | 5.85E-16 | -15.233129 | 0.63791859 | 3.90565  |
| 168 | 1.54E-10 | -9.8123561 | 0.56111594 | 3.285218 |
| 169 | 1.01E-14 | -13.994952 | -0.0983386 | 3.25035  |
| 170 | 5.28E-14 | -13.277144 | 0.74138113 | 3.385368 |
| 171 | 1.65E-10 | -9.7822937 | 0.75152342 | 3.487044 |
| 172 | 8.45E-13 | -12.073024 | 0.66803409 | 3.368298 |
| 173 | 2.53E-15 | -14.597012 | 0.35050933 | 3.64036  |
| 174 | 9.02E-16 | -15.044604 | 0.14416273 | 3.767857 |
| 175 | 6.31E-14 | -13.199705 | 0.42196527 | 3.648863 |
| 176 | 1.01E-14 | -13.994952 | 0.57954211 | 3.954617 |

---

---

|     |          |            |            |          |
|-----|----------|------------|------------|----------|
| 177 | 2.11E-13 | -12.675084 | 0.36824295 | 3.140678 |
| 178 | 1.43E-12 | -11.84578  | 0.63699786 | 3.303106 |
| 179 | 1.50E-13 | -12.824889 | 0.34395913 | 3.564781 |
| 180 | 5.71E-12 | -11.24372  | 0.4686498  | 3.196925 |
| 181 | 5.68E-14 | -13.24532  | 0.52347328 | 4.028249 |
| 182 | 3.34E-17 | -16.475968 | 0.38194272 | 4.027972 |
| 183 | 2.87E-11 | -10.541935 | 0.44146655 | 2.88323  |
| 184 | 1.43E-12 | -11.84578  | 0.50373117 | 3.144021 |
| 185 | 2.49E-12 | -11.604129 | 0.81046584 | 3.743196 |
| 186 | 1.21E-11 | -10.916751 | 0.60141947 | 3.058275 |
| 187 | 2.14E-15 | -14.669788 | 0.35191744 | 3.946584 |
| 188 | 1.15E-10 | -9.9398751 | 1.05925894 | 3.503966 |
| 189 | 9.63E-12 | -11.016476 | 0.41925924 | 3.079812 |
| 190 | 5.71E-12 | -11.24372  | 0.68014557 | 3.344099 |
| 191 | 2.30E-14 | -13.637553 | 0.40083671 | 3.292645 |
| 192 | 1.43E-12 | -11.84578  | 0.24943234 | 2.987599 |
| 193 | 2.42E-08 | -7.6157158 | 0.24179852 | 2.561017 |
| 194 | 9.02E-16 | -15.044604 | -0.4934054 | 2.941201 |
| 195 | 2.56E-09 | -8.5925919 | 0.91266395 | 3.02543  |
| 196 | 5.99E-13 | -12.222829 | 0.44743461 | 3.65377  |
| 197 | 5.71E-12 | -11.24372  | 0.6239228  | 3.290683 |
| 198 | 2.53E-13 | -12.597645 | -0.1587673 | 3.045198 |
| 199 | 1.08E-08 | -7.9665762 | 0.85341251 | 2.77381  |
| 200 | 1.58E-14 | -13.801765 | 0.66849692 | 3.790078 |
| 201 | 4.04E-12 | -11.393525 | -0.1995824 | 3.074773 |
| 202 | 7.18E-12 | -11.143995 | 1.11112948 | 3.447612 |
| 203 | 8.45E-13 | -12.073024 | 1.27578088 | 3.875231 |
| 204 | 1.65E-10 | -9.7822937 | 0.86799065 | 3.522567 |
| 205 | 1.70E-12 | -11.768341 | -0.2348516 | 2.843897 |
| 206 | 9.37E-17 | -16.028376 | -0.0654469 | 3.287646 |
| 207 | 2.62E-13 | -12.581005 | 0.46694725 | 3.414918 |
| 208 | 9.63E-12 | -11.016476 | 0.31077347 | 3.010097 |
| 209 | 1.58E-14 | -13.801765 | -0.3638617 | 2.870779 |
| 210 | 2.53E-15 | -14.597012 | -0.1004337 | 3.207039 |
| 211 | 3.55E-15 | -14.44944  | 0.26172886 | 3.636962 |
| 212 | 4.20E-12 | -11.376885 | 0.00722615 | 2.968254 |
| 213 | 5.71E-12 | -11.24372  | 0.9235927  | 3.672881 |
| 214 | 7.19E-13 | -12.143158 | 0.56097574 | 3.84755  |
| 215 | 3.75E-16 | -15.426316 | 0.15742577 | 3.636419 |
| 216 | 6.50E-11 | -10.187172 | 0.44823883 | 3.140913 |
| 217 | 1.65E-10 | -9.7822937 | 0.72383798 | 3.336842 |
| 218 | 1.31E-09 | -8.8833275 | 1.17889958 | 3.631073 |
| 219 | 4.20E-12 | -11.376885 | 0.39243558 | 3.339394 |
| 220 | 4.85E-11 | -10.314691 | 0.87350682 | 3.301166 |
| 221 | 2.49E-12 | -11.604129 | 0.53366713 | 3.463126 |

---

---

|     |          |            |            |          |
|-----|----------|------------|------------|----------|
| 222 | 8.88E-16 | -15.0515   | 0.0810311  | 3.499207 |
| 223 | 5.68E-14 | -13.24532  | 0.30109216 | 3.774576 |
| 224 | 9.63E-12 | -11.016476 | 0.86098361 | 3.59175  |
| 225 | 5.55E-17 | -16.25562  | 0.41480603 | 3.749352 |
| 226 | 3.81E-16 | -15.41942  | 0.14416791 | 3.904962 |
| 227 | 2.87E-11 | -10.541935 | 0.64006001 | 3.128503 |
| 228 | 5.71E-12 | -11.24372  | 0.57119735 | 3.275991 |
| 229 | 1.56E-13 | -12.808249 | 0.51024373 | 3.402973 |
| 230 | 3.38E-12 | -11.470964 | 0.75117675 | 3.447552 |
| 231 | 2.14E-15 | -14.669788 | 0.28314957 | 3.910023 |
| 232 | 4.20E-12 | -11.376885 | 0.75525931 | 3.668323 |
| 233 | 2.66E-14 | -13.574521 | 0.6922643  | 3.917163 |
| 234 | 1.05E-12 | -11.978945 | 0.11180044 | 3.001174 |
| 235 | 5.07E-15 | -14.294972 | -0.1922504 | 3.299379 |
| 236 | 8.36E-18 | -17.078028 | -0.0853665 | 3.426501 |
| 237 | 1.80E-11 | -10.744762 | 0.7395828  | 3.733474 |
| 238 | 1.52E-15 | -14.81736  | -0.1855476 | 3.569796 |
| 239 | 7.09E-12 | -11.149641 | 0.77836066 | 3.710711 |
| 240 | 5.28E-14 | -13.277144 | 0.73991401 | 3.475939 |
| 241 | 4.20E-12 | -11.376885 | 0.8257689  | 3.739545 |
| 242 | 6.22E-13 | -12.206189 | 0.67655093 | 3.58882  |
| 243 | 6.00E-15 | -14.222196 | 0.26830095 | 3.623602 |
| 244 | 4.26E-13 | -12.370401 | 0.4999244  | 3.83508  |
| 245 | 6.31E-14 | -13.199705 | -0.2220694 | 2.875362 |
| 246 | 1.43E-12 | -11.84578  | 0.5894918  | 3.257971 |
| 247 | 2.87E-11 | -10.541935 | 0.456822   | 2.896894 |
| 248 | 1.52E-15 | -14.81736  | 0.31208951 | 3.921422 |
| 249 | 2.28E-11 | -10.64166  | 1.13201639 | 3.830357 |
| 250 | 1.71E-14 | -13.767708 | 0.27202865 | 3.692956 |
| 251 | 6.06E-09 | -8.2177758 | 0.70933863 | 2.871222 |
| 252 | 1.01E-12 | -11.995585 | 0.67315482 | 3.919619 |
| 253 | 1.84E-09 | -8.7357549 | 0.04566916 | 2.633394 |
| 254 | 1.01E-14 | -13.994952 | -0.939998  | 2.315972 |
| 255 | 2.53E-15 | -14.597012 | 0.00712918 | 3.46461  |
| 256 | 6.06E-09 | -8.2177758 | 1.54595384 | 3.63247  |
| 257 | 4.20E-12 | -11.376885 | 0.39179694 | 3.319579 |
| 258 | 6.22E-13 | -12.206189 | 0.02605948 | 2.91471  |
| 259 | 8.45E-13 | -12.073024 | 0.08623795 | 2.748612 |
| 260 | 3.27E-10 | -9.4853874 | 0.73570822 | 3.214172 |
| 261 | 3.65E-10 | -9.4375399 | 0.01433939 | 2.822142 |
| 262 | 5.64E-17 | -16.248724 | 0.11821411 | 3.787571 |
| 263 | 6.22E-13 | -12.206189 | 0.31977721 | 3.246708 |
| 264 | 1.50E-15 | -14.824256 | 0.29449203 | 3.793103 |
| 265 | 9.44E-11 | -10.025193 | 0.74935571 | 3.701166 |
| 266 | 2.24E-10 | -9.6491396 | 0.40118583 | 2.660714 |

---



---

|     |          |            |            |          |
|-----|----------|------------|------------|----------|
| 267 | 2.30E-14 | -13.637553 | 0.28020811 | 3.225641 |
| 268 | 2.28E-11 | -10.64166  | 0.45577579 | 3.165967 |
| 269 | 3.10E-09 | -8.5085113 | 0.75339195 | 3.313068 |
| 270 | 4.26E-13 | -12.370401 | -0.1081257 | 3.123412 |
| 271 | 1.65E-10 | -9.7822937 | 0.58102721 | 3.388961 |
| 272 | 6.22E-13 | -12.206189 | 1.00474126 | 3.981151 |
| 273 | 3.95E-15 | -14.403825 | -0.0256262 | 3.144841 |
| 274 | 1.58E-14 | -13.801765 | 0.61859644 | 3.794996 |
| 275 | 1.01E-14 | -13.994952 | 0.0147266  | 3.378555 |
| 276 | 6.31E-14 | -13.199705 | 0.0623769  | 3.17971  |
| 277 | 1.31E-09 | -8.8833275 | 0.28403852 | 2.936327 |
| 278 | 4.09E-08 | -7.388472  | 0.88251536 | 3.078794 |
| 279 | 7.18E-12 | -11.143995 | 0.9941444  | 3.408858 |
| 280 | 3.38E-12 | -11.470964 | -0.0035508 | 2.746032 |
| 281 | 2.49E-12 | -11.604129 | 0.4163529  | 3.363636 |
| 282 | 6.22E-13 | -12.206189 | 1.05985539 | 4.082486 |
| 283 | 3.75E-16 | -15.426316 | 0.01320781 | 3.421999 |
| 284 | 2.28E-11 | -10.64166  | 0.60157759 | 3.385965 |
| 285 | 1.47E-12 | -11.831373 | 0.23750576 | 3.145342 |
| 286 | 2.53E-15 | -14.597012 | -0.5007693 | 2.81498  |
| 287 | 5.71E-12 | -11.24372  | 0.26330425 | 3.040113 |
| 288 | 1.31E-09 | -8.8833275 | 0.82690308 | 3.315254 |
| 289 | 5.74E-08 | -7.2408996 | 0.81671365 | 3.006944 |
| 290 | 1.94E-10 | -9.7126312 | 0.41913134 | 2.863354 |
| 291 | 4.85E-11 | -10.314691 | 0.71976685 | 3.199894 |
| 292 | 6.00E-15 | -14.222196 | 0.16232613 | 3.59175  |
| 293 | 1.07E-13 | -12.972461 | 0.22989823 | 3.464972 |
| 294 | 3.95E-15 | -14.403825 | 0.13409691 | 3.27568  |
| 295 | 6.31E-14 | -13.199705 | -0.054479  | 3.09324  |
| 296 | 3.55E-15 | -14.44944  | 0.64609748 | 3.990526 |
| 297 | 6.31E-14 | -13.199705 | -0.1230964 | 3.061343 |
| 298 | 3.65E-10 | -9.4375399 | -0.0851405 | 2.65035  |
| 299 | 4.20E-12 | -11.376885 | 0.37541748 | 3.322145 |
| 300 | 1.50E-15 | -14.824256 | 0.05074093 | 3.339504 |
| 301 | 1.42E-14 | -13.84738  | -0.0563244 | 3.276997 |
| 302 | 2.28E-11 | -10.64166  | 0.99818061 | 3.79026  |
| 303 | 1.07E-13 | -12.972461 | 0.27157184 | 3.443357 |
| 304 | 6.22E-13 | -12.206189 | 0.75661262 | 3.633839 |
| 305 | 5.71E-12 | -11.24372  | 0.49202607 | 3.219246 |
| 306 | 6.83E-14 | -13.165648 | 0.2330452  | 3.626107 |
| 307 | 6.72E-11 | -10.172765 | 0.87194728 | 3.89096  |
| 308 | 9.13E-11 | -10.0396   | 0.31740975 | 3.113128 |
| 309 | 2.49E-12 | -11.604129 | 0.74203563 | 3.782214 |
| 310 | 2.83E-11 | -10.547581 | 0.15389276 | 3.205195 |
| 311 | 4.85E-11 | -10.314691 | 0.56661436 | 3.101633 |

---

---

|     |          |            |            |          |
|-----|----------|------------|------------|----------|
| 312 | 1.58E-14 | -13.801765 | 0.40409948 | 3.545342 |
| 313 | 5.71E-12 | -11.24372  | 0.88807224 | 3.617663 |
| 314 | 1.94E-10 | -9.7126312 | 0.74764505 | 3.155694 |
| 315 | 9.95E-12 | -11.002069 | -0.0139003 | 3.058001 |
| 316 | 9.63E-12 | -11.016476 | 0.88111111 | 3.590774 |
| 317 | 1.54E-10 | -9.8123561 | 0.6209212  | 3.476621 |
| 318 | 2.66E-14 | -13.574521 | 0.04186581 | 3.157764 |
| 319 | 4.46E-09 | -8.3509298 | 0.09438273 | 2.787578 |
| 320 | 3.74E-14 | -13.426949 | -0.1625648 | 2.99752  |
| 321 | 9.02E-16 | -15.044604 | 0.43164516 | 4.041408 |
| 322 | 1.27E-15 | -14.897032 | 0.19309095 | 3.826389 |
| 323 | 1.15E-10 | -9.9398751 | 1.05008342 | 3.630204 |
| 324 | 4.20E-12 | -11.376885 | 0.42674565 | 3.484416 |
| 325 | 6.82E-12 | -11.166281 | 0.23042133 | 3.465537 |
| 326 | 1.58E-14 | -13.801765 | 0.4011069  | 3.674531 |
| 327 | 4.57E-13 | -12.340339 | 0.542654   | 3.778953 |
| 328 | 1.94E-10 | -9.7126312 | 0.37320034 | 2.854545 |
| 329 | 1.50E-13 | -12.824889 | 0.756067   | 4.00899  |
| 330 | 1.94E-10 | -9.7126312 | 0.78890385 | 3.225641 |
| 331 | 3.95E-15 | -14.403825 | 0.28270574 | 3.396714 |
| 332 | 2.53E-13 | -12.597645 | 0.4330483  | 3.735065 |
| 333 | 2.28E-11 | -10.64166  | 1.02032977 | 3.72371  |
| 334 | 7.75E-10 | -9.1105712 | 1.26928463 | 3.733212 |
| 335 | 2.16E-10 | -9.6647837 | 0.39701371 | 3.2355   |
| 336 | 1.35E-11 | -10.868904 | 1.03206866 | 3.776836 |
| 337 | 2.53E-13 | -12.597645 | -0.2535973 | 2.920677 |
| 338 | 1.43E-12 | -11.84578  | 0.33546347 | 3.051282 |
| 339 | 2.87E-11 | -10.541935 | 0.7588966  | 3.254237 |
| 340 | 1.05E-12 | -11.978945 | 0.82949831 | 3.690175 |
| 341 | 3.38E-12 | -11.470964 | 0.27156355 | 2.972783 |
| 342 | 2.87E-11 | -10.541935 | 0.77821853 | 3.252247 |
| 343 | 9.22E-14 | -13.035493 | 0.37964903 | 3.307287 |
| 344 | 2.24E-10 | -9.6491396 | 1.15287136 | 3.322599 |
| 345 | 1.94E-10 | -9.7126312 | 1.1676532  | 3.641863 |
| 346 | 1.01E-12 | -11.995585 | 0.14727617 | 3.330853 |
| 347 | 9.59E-14 | -13.018076 | -0.119882  | 3.319419 |
| 348 | 6.00E-15 | -14.222196 | 0.17247928 | 3.458246 |
| 349 | 1.51E-09 | -8.8198357 | 0.86791048 | 3.049603 |
| 350 | 8.45E-13 | -12.073024 | 0.95496457 | 3.68165  |
| 351 | 2.26E-16 | -15.646664 | 0.22309971 | 3.793375 |
| 352 | 2.11E-13 | -12.675084 | 0.25804909 | 2.854562 |
| 353 | 1.50E-13 | -12.824889 | -0.0585651 | 3.255656 |
| 354 | 1.58E-14 | -13.801765 | -0.2259705 | 2.909091 |
| 355 | 3.75E-16 | -15.426316 | 0.39127738 | 3.783582 |
| 356 | 8.36E-18 | -17.078028 | 0.25155603 | 3.896329 |

---

---

|     |          |            |            |          |
|-----|----------|------------|------------|----------|
| 357 | 2.87E-11 | -10.541935 | 0.50698572 | 2.957419 |
| 358 | 3.75E-16 | -15.426316 | 0.12121345 | 3.499301 |
| 359 | 4.50E-12 | -11.346823 | 0.57339658 | 3.543155 |
| 360 | 9.13E-11 | -10.0396   | 0.34033027 | 2.989263 |
| 361 | 2.87E-11 | -10.541935 | 0.75809165 | 3.198135 |
| 362 | 1.51E-09 | -8.8198357 | 1.06425902 | 3.308176 |
| 363 | 9.22E-14 | -13.035493 | 0.42003249 | 3.367366 |
| 364 | 3.69E-13 | -12.433433 | 0.65448742 | 3.625496 |
| 365 | 6.22E-13 | -12.206189 | 0.38139451 | 3.290683 |
| 366 | 8.18E-11 | -10.087447 | 0.49592688 | 2.964103 |
| 367 | 6.31E-14 | -13.199705 | 0.35760828 | 3.653247 |
| 368 | 6.22E-13 | -12.206189 | -0.0767652 | 2.845478 |
| 369 | 3.74E-14 | -13.426949 | 0.12832371 | 3.37931  |
| 370 | 1.07E-13 | -12.972461 | -0.1082909 | 2.997101 |
| 371 | 1.77E-12 | -11.751701 | 0.03439814 | 3.037288 |
| 372 | 3.89E-14 | -13.410309 | -0.0195263 | 2.885714 |
| 373 | 7.75E-10 | -9.1105712 | 0.88511949 | 3.329365 |
| 374 | 2.66E-14 | -13.574521 | 0.04399585 | 3.219742 |
| 375 | 8.45E-13 | -12.073024 | 0.99881649 | 3.581419 |
| 376 | 3.59E-09 | -8.4450195 | 0.55010797 | 2.753731 |
| 377 | 5.85E-16 | -15.233129 | 0.61987586 | 3.839286 |
| 378 | 2.87E-11 | -10.541935 | 0.68901512 | 3.10352  |
| 379 | 2.26E-16 | -15.646664 | 0.15646518 | 3.860859 |
| 380 | 3.38E-12 | -11.470964 | 0.53618125 | 3.261409 |
| 381 | 8.45E-13 | -12.073024 | 0.34450336 | 3.139141 |
| 382 | 2.34E-15 | -14.631069 | 0.72423059 | 3.99887  |
| 383 | 1.68E-11 | -10.774825 | 0.61898335 | 3.610788 |
| 384 | 6.22E-13 | -12.206189 | -0.2668218 | 2.68998  |
| 385 | 4.13E-11 | -10.384354 | 0.1569513  | 2.881119 |
| 386 | 9.59E-14 | -13.018076 | 0.30090371 | 3.681299 |
| 387 | 1.58E-14 | -13.801765 | 0.14523255 | 3.307692 |
| 388 | 1.58E-14 | -13.801765 | 0.40837367 | 3.682396 |
| 389 | 1.58E-14 | -13.801765 | 0.40870697 | 3.531299 |
| 390 | 8.45E-13 | -12.073024 | 0.46995895 | 3.179487 |
| 391 | 9.22E-14 | -13.035493 | 0.04514776 | 2.968832 |
| 392 | 2.92E-11 | -10.534159 | 0.40670705 | 3.655932 |
| 393 | 7.18E-12 | -11.143995 | 0.40854959 | 2.838811 |
| 394 | 2.66E-14 | -13.574521 | 0.05095794 | 3.186567 |
| 395 | 4.20E-12 | -11.376885 | 0.1909018  | 3.154762 |
| 396 | 3.69E-13 | -12.433433 | 0.08927396 | 3.09322  |
| 397 | 1.05E-12 | -11.978945 | 0.11532612 | 3.119774 |
| 398 | 2.40E-14 | -13.620136 | 0.27428101 | 3.719196 |
| 399 | 9.35E-15 | -14.029009 | 0.51370833 | 3.747753 |
| 400 | 2.14E-15 | -14.669788 | -0.0753922 | 3.639413 |
| 401 | 4.09E-08 | -7.388472  | 0.31297351 | 2.657143 |

---

---

|     |          |            |            |          |
|-----|----------|------------|------------|----------|
| 402 | 3.95E-15 | -14.403825 | 0.46737602 | 3.653613 |
| 403 | 6.22E-13 | -12.206189 | 0.27064842 | 3.324675 |
| 404 | 3.38E-12 | -11.470964 | 0.82013624 | 3.513287 |
| 405 | 2.24E-10 | -9.6491396 | 0.85698954 | 3.024242 |
| 406 | 9.63E-12 | -11.016476 | 0.52099364 | 3.266526 |
| 407 | 3.27E-10 | -9.4853874 | 0.36079087 | 2.878371 |
| 408 | 3.55E-15 | -14.44944  | -0.049001  | 3.306294 |
| 409 | 4.20E-12 | -11.376885 | 0.44585222 | 3.479734 |
| 410 | 6.22E-13 | -12.206189 | -0.0185634 | 3.005445 |
| 411 | 5.71E-12 | -11.24372  | 0.27021125 | 3.00744  |
| 412 | 3.38E-12 | -11.470964 | 0.76786606 | 3.482639 |
| 413 | 1.34E-16 | -15.873908 | 0.26980045 | 3.918155 |
| 414 | 1.58E-14 | -13.801765 | 0.08973564 | 3.389238 |
| 415 | 1.94E-10 | -9.7126312 | 0.91505963 | 3.39435  |
| 416 | 3.34E-17 | -16.475968 | 0.22067169 | 3.835431 |
| 417 | 6.22E-13 | -12.206189 | 0.68030971 | 3.611501 |
| 418 | 2.28E-11 | -10.64166  | 0.66919826 | 3.351185 |
| 419 | 1.56E-13 | -12.808249 | 0.29287827 | 3.219491 |
| 420 | 1.05E-12 | -11.978945 | 0.10636888 | 2.995696 |
| 421 | 6.06E-09 | -8.2177758 | 0.60299662 | 2.828869 |
| 422 | 1.50E-15 | -14.824256 | 0.28076084 | 3.702877 |
| 423 | 1.58E-14 | -13.801765 | -0.0579013 | 3.110119 |
| 424 | 3.55E-15 | -14.44944  | 0.11071239 | 3.668175 |
| 425 | 1.94E-10 | -9.7126312 | 0.62864192 | 3.065847 |
| 426 | 9.22E-14 | -13.035493 | 0.47520504 | 3.334035 |
| 427 | 1.47E-12 | -11.831373 | 0.02217693 | 2.964103 |
| 428 | 5.71E-12 | -11.24372  | 0.46673964 | 3.256503 |
| 429 | 6.32E-16 | -15.199072 | 0.01209269 | 3.334161 |
| 430 | 3.65E-10 | -9.4375399 | 0.78632096 | 3.610762 |
| 431 | 5.71E-12 | -11.24372  | 0.53891844 | 3.245221 |
| 432 | 3.79E-10 | -9.4218958 | 0.57709287 | 2.823903 |
| 433 | 4.59E-10 | -9.337815  | -0.221534  | 2.393224 |
| 434 | 6.22E-13 | -12.206189 | 0.55603245 | 3.592257 |
| 435 | 7.71E-13 | -12.113095 | -0.018249  | 3.152778 |
| 436 | 6.22E-13 | -12.206189 | 0.80178877 | 3.734416 |
| 437 | 1.21E-10 | -9.9154588 | 0.69346155 | 3.732607 |
| 438 | 1.35E-11 | -10.868904 | 0.83529755 | 3.527739 |
| 439 | 5.99E-13 | -12.222829 | 0.52240599 | 3.805808 |
| 440 | 2.14E-15 | -14.669788 | 0.02028866 | 3.696915 |
| 441 | 9.35E-15 | -14.029009 | 0.27822087 | 3.471726 |
| 442 | 7.18E-12 | -11.143995 | 0.45761992 | 2.965098 |
| 443 | 8.45E-13 | -12.073024 | 0.62878283 | 3.27856  |
| 444 | 5.61E-09 | -8.2512049 | 1.05996427 | 3.54507  |
| 445 | 1.58E-14 | -13.801765 | 0.36642812 | 3.612429 |
| 446 | 1.56E-13 | -12.808249 | -0.3146827 | 2.587578 |

---

---

|     |          |            |            |          |
|-----|----------|------------|------------|----------|
| 447 | 2.30E-14 | -13.637553 | 0.77289816 | 3.66784  |
| 448 | 1.51E-09 | -8.8198357 | 1.06376815 | 3.19627  |
| 449 | 1.47E-12 | -11.831373 | 0.51345883 | 3.503437 |
| 450 | 1.50E-15 | -14.824256 | 0.29449203 | 3.793103 |
| 451 | 3.10E-09 | -8.5085113 | 0.38423127 | 2.918079 |
| 452 | 2.87E-11 | -10.541935 | 0.98572997 | 3.384109 |
| 453 | 2.24E-10 | -9.6491396 | 0.91077295 | 3.085317 |
| 454 | 9.63E-12 | -11.016476 | -0.1003864 | 2.672131 |
| 455 | 1.52E-15 | -14.81736  | 0.0289425  | 3.735714 |
| 456 | 7.18E-12 | -11.143995 | 0.25708151 | 2.704225 |
| 457 | 1.05E-12 | -11.978945 | 0.78272829 | 3.777366 |
| 458 | 1.34E-16 | -15.873908 | 0.37559204 | 3.974741 |
| 459 | 5.71E-12 | -11.24372  | 0.71373253 | 3.493648 |
| 460 | 2.53E-15 | -14.597012 | 0.32139867 | 3.79774  |
| 461 | 4.85E-11 | -10.314691 | 0.14942014 | 2.689053 |
| 462 | 3.95E-15 | -14.403825 | 0.34051091 | 3.496927 |
| 463 | 1.07E-13 | -12.972461 | 0.54532425 | 3.830611 |
| 464 | 2.87E-11 | -10.541935 | 0.95657233 | 3.341615 |
| 465 | 6.22E-13 | -12.206189 | 0.2480017  | 3.277677 |
| 466 | 5.23E-09 | -8.2812674 | 0.94435701 | 3.347234 |
| 467 | 2.87E-11 | -10.541935 | 0.42527264 | 2.974592 |
| 468 | 1.54E-10 | -9.8123561 | 0.59815911 | 3.283582 |
| 469 | 8.97E-10 | -9.0470796 | 1.06314313 | 3.286364 |
| 470 | 9.59E-14 | -13.018076 | -0.0750554 | 3.321523 |
| 471 | 6.22E-13 | -12.206189 | 0.67070449 | 3.621445 |
| 472 | 5.71E-12 | -11.24372  | 1.22014569 | 3.857143 |
| 473 | 1.31E-09 | -8.8833275 | 0.99314114 | 3.464407 |
| 474 | 1.01E-14 | -13.994952 | 0.15907339 | 3.500207 |
| 475 | 1.56E-13 | -12.808249 | 0.71926544 | 3.563104 |
| 476 | 3.79E-10 | -9.4218958 | 0.62247668 | 2.799172 |
| 477 | 6.22E-13 | -12.206189 | 0.5479843  | 3.477612 |
| 478 | 1.50E-15 | -14.824256 | -0.3768014 | 2.894824 |
| 479 | 1.71E-14 | -13.767708 | 0.36451436 | 3.753292 |
| 480 | 1.58E-14 | -13.801765 | 0.59279469 | 3.76734  |
| 481 | 6.00E-15 | -14.222196 | 0.27673127 | 3.633126 |
| 482 | 1.01E-14 | -13.994952 | 0.249957   | 3.582942 |
| 483 | 9.02E-16 | -15.044604 | -0.0693611 | 3.536753 |
| 484 | 1.62E-13 | -12.790832 | 0.00875342 | 3.393849 |
| 485 | 8.45E-13 | -12.073024 | 1.11309183 | 3.792541 |
| 486 | 2.53E-15 | -14.597012 | 0.47155898 | 3.919643 |
| 487 | 2.34E-15 | -14.631069 | 0.85163129 | 4.044776 |
| 488 | 6.83E-14 | -13.165648 | -0.0235556 | 3.357143 |
| 489 | 1.43E-12 | -11.84578  | 1.02462105 | 3.748281 |
| 490 | 3.74E-14 | -13.426949 | 0.32043285 | 3.437011 |
| 491 | 6.00E-15 | -14.222196 | 0.45278479 | 3.898313 |

---

---

|     |          |            |            |          |
|-----|----------|------------|------------|----------|
| 492 | 4.27E-15 | -14.369768 | 0.10077637 | 3.41471  |
| 493 | 2.34E-15 | -14.631069 | 0.74825097 | 3.893975 |
| 494 | 4.34E-14 | -13.36283  | 0.04025519 | 3.386304 |
| 495 | 1.71E-14 | -13.767708 | 0.44902233 | 3.969752 |
| 496 | 1.43E-12 | -11.84578  | 0.51691009 | 3.224242 |
| 497 | 5.85E-16 | -15.233129 | 0.74306484 | 3.94965  |
| 498 | 4.05E-14 | -13.392892 | -0.0924646 | 3.196792 |
| 499 | 6.22E-13 | -12.206189 | 0.57980522 | 3.491097 |
| 500 | 2.66E-14 | -13.574521 | -0.3168989 | 2.75626  |
| 501 | 1.35E-11 | -10.868904 | 0.5489591  | 3.219462 |
| 502 | 4.20E-12 | -11.376885 | 0.71411136 | 3.707562 |
| 503 | 1.58E-14 | -13.801765 | 0.54564313 | 3.759425 |
| 504 | 7.18E-12 | -11.143995 | 0.20506162 | 2.688323 |
| 505 | 1.43E-12 | -11.84578  | 0.77617762 | 3.490575 |
| 506 | 1.15E-10 | -9.9398751 | 0.85904637 | 3.306052 |
| 507 | 9.35E-15 | -14.029009 | 0.08637825 | 3.187011 |
| 508 | 1.51E-09 | -8.8198357 | 0.84234265 | 2.996488 |
| 509 | 1.54E-10 | -9.8123561 | 0.50419416 | 3.212121 |
| 510 | 4.95E-18 | -17.305272 | 0.20967679 | 3.84623  |
| 511 | 2.87E-11 | -10.541935 | 0.74132095 | 3.27987  |
| 512 | 1.07E-13 | -12.972461 | 0.56416107 | 3.825989 |
| 513 | 6.31E-14 | -13.199705 | 0.17282095 | 3.279343 |
| 514 | 1.15E-10 | -9.9398751 | 0.38686845 | 3.005279 |
| 515 | 1.58E-14 | -13.801765 | 0.52948807 | 3.679503 |
| 516 | 3.27E-10 | -9.4853874 | 0.69414911 | 3.124232 |
| 517 | 1.58E-14 | -13.801765 | 0.52561805 | 3.675362 |
| 518 | 5.76E-15 | -14.239613 | 0.05795228 | 2.963975 |
| 519 | 3.89E-14 | -13.410309 | 0.46104179 | 3.429067 |
| 520 | 5.71E-12 | -11.24372  | 0.78221508 | 3.458736 |
| 521 | 4.27E-15 | -14.369768 | 0.1030901  | 3.457419 |
| 522 | 1.52E-15 | -14.81736  | -0.0366247 | 3.484472 |
| 523 | 1.01E-12 | -11.995585 | -0.0313534 | 3.160233 |
| 524 | 2.87E-11 | -10.541935 | 1.15849198 | 3.678546 |
| 525 | 3.85E-11 | -10.414416 | 0.5173974  | 3.283616 |
| 526 | 3.85E-11 | -10.414416 | 0.94335516 | 3.670545 |
| 527 | 9.35E-15 | -14.029009 | 0.7238512  | 3.907814 |
| 528 | 3.61E-15 | -14.442544 | 0.06838187 | 3.653613 |
| 529 | 9.59E-14 | -13.018076 | -0.4931441 | 2.845584 |
| 530 | 6.22E-13 | -12.206189 | -0.1928763 | 2.677897 |
| 531 | 6.31E-14 | -13.199705 | 0.41068136 | 3.6367   |
| 532 | 1.01E-12 | -11.995585 | 0.46788146 | 3.63345  |
| 533 | 1.07E-13 | -12.972461 | 0.35320701 | 3.510536 |
| 534 | 6.60E-10 | -9.1802336 | 0.84145577 | 3.44807  |
| 535 | 4.26E-13 | -12.370401 | 0.33485653 | 3.628571 |
| 536 | 4.49E-14 | -13.347278 | -0.2136931 | 2.985876 |

---

---

|     |          |            |            |          |
|-----|----------|------------|------------|----------|
| 537 | 1.58E-14 | -13.801765 | 0.35426183 | 3.575886 |
| 538 | 6.22E-13 | -12.206189 | -0.510077  | 2.462189 |
| 539 | 1.15E-10 | -9.9398751 | 0.66377533 | 3.131448 |
| 540 | 3.27E-10 | -9.4853874 | 0.56594131 | 3.101028 |
| 541 | 2.87E-11 | -10.541935 | 0.38676939 | 2.901639 |
| 542 | 3.74E-14 | -13.426949 | -0.0026933 | 3.129061 |
| 543 | 5.41E-11 | -10.266844 | 0.55488227 | 3.279266 |
| 544 | 1.44E-08 | -7.8429596 | 0.8874068  | 3.138961 |
| 545 | 6.22E-13 | -12.206189 | 0.67250034 | 3.6036   |
| 546 | 3.38E-12 | -11.470964 | 0.58512183 | 3.327869 |
| 547 | 1.14E-13 | -12.942399 | -0.1542274 | 2.966637 |
| 548 | 3.17E-16 | -15.499092 | 0.48855345 | 4.131694 |
| 549 | 2.83E-11 | -10.547581 | 0.30935546 | 3.364286 |
| 550 | 3.95E-15 | -14.403825 | 0.40199913 | 3.650847 |
| 551 | 1.01E-14 | -13.994952 | 0.07337155 | 3.467262 |
| 552 | 8.45E-13 | -12.073024 | 0.80989267 | 3.485075 |
| 553 | 2.34E-15 | -14.631069 | 0.2558778  | 3.386749 |
| 554 | 5.71E-12 | -11.24372  | 0.20975079 | 2.9688   |
| 555 | 1.58E-14 | -13.801765 | 0.19389144 | 3.339772 |
| 556 | 3.85E-11 | -10.414416 | 0.36823146 | 3.082517 |
| 557 | 1.21E-10 | -9.9154588 | 0.47547056 | 3.509982 |
| 558 | 5.71E-12 | -11.24372  | 0.74488947 | 3.480698 |
| 559 | 2.53E-13 | -12.597645 | -0.2767667 | 2.854545 |
| 560 | 1.58E-14 | -13.801765 | 0.69349599 | 4.017532 |
| 561 | 1.54E-10 | -9.8123561 | 1.08943633 | 3.751097 |
| 562 | 1.58E-14 | -13.801765 | 0.29218382 | 3.445127 |
| 563 | 9.02E-16 | -15.044604 | 0.10747824 | 3.634977 |
| 564 | 1.50E-15 | -14.824256 | 0.30992953 | 3.713287 |
| 565 | 9.22E-14 | -13.035493 | 0.31760794 | 3.244513 |
| 566 | 4.20E-12 | -11.376885 | 0.58150422 | 3.61827  |
| 567 | 1.50E-15 | -14.824256 | 0.29610911 | 3.851153 |
| 568 | 1.01E-14 | -13.994952 | 0.18044331 | 3.612374 |
| 569 | 1.71E-14 | -13.767708 | 0.1777667  | 3.521325 |
| 570 | 1.56E-13 | -12.808249 | -0.1222874 | 2.85669  |
| 571 | 3.74E-14 | -13.426949 | 0.03268839 | 3.251977 |
| 572 | 8.97E-10 | -9.0470796 | 0.34463118 | 2.613591 |
| 573 | 4.04E-12 | -11.393525 | 0.02291804 | 3.29026  |
| 574 | 1.51E-09 | -8.8198357 | 0.70388817 | 2.852504 |
| 575 | 2.28E-11 | -10.64166  | 0.71010972 | 3.32386  |
| 576 | 5.90E-12 | -11.229313 | 0.50282325 | 3.451282 |
| 577 | 1.31E-09 | -8.8833275 | 1.0264192  | 3.372455 |
| 578 | 8.45E-13 | -12.073024 | 0.16618961 | 2.967937 |
| 579 | 1.58E-14 | -13.801765 | 0.33539271 | 3.511888 |
| 580 | 1.34E-16 | -15.873908 | -0.0850184 | 3.426915 |
| 581 | 1.71E-14 | -13.767708 | 0.11123537 | 3.466637 |

---

---

|     |          |            |            |          |
|-----|----------|------------|------------|----------|
| 582 | 8.45E-13 | -12.073024 | 0.69510314 | 3.498701 |
| 583 | 1.43E-12 | -11.84578  | 0.74599513 | 3.481756 |
| 584 | 1.94E-10 | -9.7126312 | 0.82811869 | 3.243635 |
| 585 | 9.22E-14 | -13.035493 | 0.82740865 | 3.741201 |
| 586 | 2.49E-12 | -11.604129 | -0.3664313 | 2.672727 |
| 587 | 1.58E-14 | -13.801765 | -0.0200933 | 3.150794 |
| 588 | 3.81E-16 | -15.41942  | -0.0857924 | 3.626834 |
| 589 | 9.22E-14 | -13.035493 | 0.25636298 | 3.164389 |
| 590 | 1.01E-14 | -13.994952 | -0.1274686 | 3.239087 |
| 591 | 1.31E-09 | -8.8833275 | 0.98121674 | 3.474289 |
| 592 | 5.55E-17 | -16.25562  | 0.18924395 | 3.514476 |
| 593 | 2.88E-14 | -13.540465 | 0.19604205 | 3.584149 |
| 594 | 8.45E-13 | -12.073024 | -0.0331608 | 2.717758 |
| 595 | 1.56E-13 | -12.808249 | 0.22167725 | 3.186012 |
| 596 | 3.74E-14 | -13.426949 | 0.35140778 | 3.673655 |
| 597 | 1.02E-08 | -7.9905321 | 0.27259842 | 2.553571 |
| 598 | 2.79E-10 | -9.5550498 | 0.27726362 | 2.995804 |
| 599 | 2.53E-15 | -14.597012 | 0.297184   | 3.698834 |
| 600 | 6.22E-13 | -12.206189 | 0.33671826 | 3.323638 |
| 601 | 1.15E-10 | -9.9398751 | 0.71703107 | 3.179067 |
| 602 | 1.58E-14 | -13.801765 | 0.66510481 | 3.805164 |
| 603 | 4.20E-12 | -11.376885 | 0.23881274 | 3.183683 |
| 604 | 7.18E-12 | -11.143995 | 0.55180662 | 3.013986 |
| 605 | 9.22E-14 | -13.035493 | 0.12682211 | 3.03354  |
| 606 | 2.28E-11 | -10.64166  | 0.60323334 | 3.288411 |
| 607 | 3.79E-10 | -9.4218958 | 1.03662171 | 3.225424 |
| 608 | 1.56E-13 | -12.808249 | 0.41129347 | 3.358508 |
| 609 | 5.71E-12 | -11.24372  | 1.26178478 | 3.975145 |
| 610 | 1.07E-13 | -12.972461 | 0.33138022 | 3.574576 |
| 611 | 9.59E-14 | -13.018076 | -0.3090979 | 3.032738 |
| 612 | 7.18E-12 | -11.143995 | 0.65751657 | 3.163277 |
| 613 | 2.30E-14 | -13.637553 | 0.18357432 | 3.147321 |
| 614 | 5.85E-16 | -15.233129 | 0.36508401 | 3.523266 |
| 615 | 1.02E-08 | -7.9905321 | 0.97130617 | 3.119347 |
| 616 | 2.53E-15 | -14.597012 | -0.2413383 | 3.067603 |
| 617 | 1.01E-14 | -13.994952 | 0.57634514 | 4.03869  |
| 618 | 1.50E-15 | -14.824256 | 0.27489859 | 3.631056 |
| 619 | 1.21E-11 | -10.916751 | 0.38421624 | 2.937689 |
| 620 | 3.27E-10 | -9.4853874 | 0.7343821  | 3.128326 |
| 621 | 9.22E-14 | -13.035493 | 0.23674673 | 3.266183 |
| 622 | 1.05E-12 | -11.978945 | 0.71385542 | 3.626501 |
| 623 | 6.83E-14 | -13.165648 | 0.03835276 | 3.500302 |
| 624 | 5.71E-12 | -11.24372  | 0.91094879 | 3.683001 |
| 625 | 2.28E-11 | -10.64166  | 0.79651517 | 3.472344 |
| 626 | 3.38E-12 | -11.470964 | 0.80901766 | 3.542041 |

---



---

|     |          |            |            |          |
|-----|----------|------------|------------|----------|
| 627 | 5.71E-12 | -11.24372  | 0.28655603 | 3.004662 |
| 628 | 1.58E-14 | -13.801765 | 0.608331   | 3.744523 |
| 629 | 2.14E-15 | -14.669788 | 0.07574615 | 3.686012 |
| 630 | 1.73E-07 | -6.7624563 | 1.67130767 | 3.405258 |
| 631 | 9.95E-12 | -11.002069 | 0.59987241 | 3.54965  |
| 632 | 6.83E-14 | -13.165648 | 0.38599156 | 3.799534 |
| 633 | 5.71E-12 | -11.24372  | 0.88007215 | 3.589782 |
| 634 | 1.50E-15 | -14.824256 | 0.69575519 | 4.128183 |
| 635 | 1.42E-14 | -13.84738  | 0.42591118 | 3.801656 |
| 636 | 2.87E-11 | -10.541935 | 0.65729922 | 3.108159 |
| 637 | 3.89E-14 | -13.410309 | -0.0875481 | 2.912994 |
| 638 | 1.31E-09 | -8.8833275 | 0.92617079 | 3.366071 |
| 639 | 3.38E-12 | -11.470964 | 0.17423069 | 2.880158 |
| 640 | 3.79E-10 | -9.4218958 | 0.50254717 | 2.714223 |
| 641 | 2.53E-15 | -14.597012 | 0.12314498 | 3.52381  |
| 642 | 3.75E-16 | -15.426316 | -0.0475284 | 3.161096 |
| 643 | 1.05E-12 | -11.978945 | 0.000836   | 2.857193 |
| 644 | 3.38E-12 | -11.470964 | 0.92566462 | 3.653622 |
| 645 | 5.71E-12 | -11.24372  | 0.38203413 | 3.06087  |
| 646 | 1.56E-13 | -12.808249 | 0.451309   | 3.399068 |
| 647 | 2.11E-13 | -12.675084 | 0.20029075 | 2.888199 |
| 648 | 2.40E-14 | -13.620136 | -0.0066771 | 3.333187 |
| 649 | 1.51E-09 | -8.8198357 | 0.95561565 | 3.106294 |
| 650 | 1.05E-12 | -11.978945 | 0.77445598 | 3.70676  |
| 651 | 3.69E-13 | -12.433433 | 0.93159302 | 3.975802 |
| 652 | 6.22E-13 | -12.206189 | -0.1362031 | 2.785338 |
| 653 | 1.31E-09 | -8.8833275 | 0.39446954 | 2.841408 |
| 654 | 8.45E-13 | -12.073024 | 0.48903285 | 3.197669 |
| 655 | 1.56E-13 | -12.808249 | -0.4681013 | 2.449517 |
| 656 | 8.45E-13 | -12.073024 | 0.90367984 | 3.699351 |
| 657 | 1.07E-13 | -12.972461 | 0.07314539 | 3.272871 |
| 658 | 9.22E-14 | -13.035493 | 0.26620152 | 3.174327 |
| 659 | 2.87E-11 | -10.541935 | 0.3478016  | 2.866737 |
| 660 | 2.53E-15 | -14.597012 | 0.52464891 | 3.854035 |
| 661 | 2.34E-15 | -14.631069 | 0.13940141 | 3.367232 |
| 662 | 2.53E-13 | -12.597645 | 0.09626789 | 3.197574 |
| 663 | 1.71E-14 | -13.767708 | -0.0599676 | 3.362712 |
| 664 | 1.05E-12 | -11.978945 | 0.79050857 | 3.723003 |
| 665 | 2.53E-13 | -12.597645 | 0.48525326 | 3.717081 |
| 666 | 1.50E-13 | -12.824889 | -0.0519073 | 3.116567 |
| 667 | 9.22E-14 | -13.035493 | 0.84821112 | 3.781387 |
| 668 | 9.95E-12 | -11.002069 | 0.73923684 | 3.690909 |
| 669 | 5.41E-11 | -10.266844 | 0.84899164 | 3.540793 |
| 670 | 1.01E-14 | -13.994952 | 0.42178555 | 3.863095 |
| 671 | 3.75E-16 | -15.426316 | 0.5098478  | 3.89648  |

---

---

|     |          |            |            |          |
|-----|----------|------------|------------|----------|
| 672 | 1.58E-14 | -13.801765 | 0.4300286  | 3.573085 |
| 673 | 1.94E-10 | -9.7126312 | 0.73475865 | 3.319759 |
| 674 | 1.42E-14 | -13.84738  | 0.17281441 | 3.628249 |
| 675 | 9.13E-11 | -10.0396   | 0.28942483 | 3.108442 |
| 676 | 3.04E-11 | -10.517519 | 0.21659885 | 3.124224 |
| 677 | 6.22E-13 | -12.206189 | 0.63528845 | 3.585548 |
| 678 | 1.43E-12 | -11.84578  | 0.64797877 | 3.330992 |
| 679 | 1.21E-10 | -9.9154588 | 0.13971537 | 3.144633 |
| 680 | 5.71E-12 | -11.24372  | 0.56817506 | 3.255048 |
| 681 | 6.06E-09 | -8.2177758 | 1.26505023 | 3.435572 |
| 682 | 1.35E-11 | -10.868904 | 1.09261905 | 3.813326 |
| 683 | 4.05E-14 | -13.392892 | -0.0222766 | 3.336597 |
| 684 | 3.74E-14 | -13.426949 | 0.52921395 | 3.660016 |
| 685 | 9.95E-12 | -11.002069 | -0.335342  | 2.583845 |
| 686 | 9.37E-17 | -16.028376 | 0.02930844 | 3.334116 |
| 687 | 1.07E-13 | -12.972461 | -0.258468  | 2.894345 |
| 688 | 4.85E-11 | -10.314691 | 0.81372005 | 3.214493 |
| 689 | 2.53E-15 | -14.597012 | -0.0792087 | 3.251097 |
| 690 | 6.32E-16 | -15.199072 | -0.1283523 | 3.216317 |
| 691 | 1.07E-13 | -12.972461 | 0.37898259 | 3.625989 |
| 692 | 1.51E-09 | -8.8198357 | 0.88695096 | 3.082496 |
| 693 | 1.05E-12 | -11.978945 | -0.0858852 | 2.914689 |
| 694 | 1.47E-12 | -11.831373 | 0.73411277 | 3.706349 |
| 695 | 2.27E-13 | -12.64326  | 0.24583211 | 3.663194 |
| 696 | 8.45E-13 | -12.073024 | 1.21840126 | 4.027254 |
| 697 | 6.22E-13 | -12.206189 | 0.29407741 | 3.202484 |
| 698 | 2.92E-07 | -6.5352125 | 0.9688049  | 2.948288 |
| 699 | 2.28E-11 | -10.64166  | 0.9133184  | 3.621528 |
| 700 | 2.53E-13 | -12.597645 | 0.13872021 | 3.300699 |
| 701 | 5.71E-12 | -11.24372  | 0.82241068 | 3.534722 |
| 702 | 5.71E-12 | -11.24372  | 0.52631127 | 3.251984 |
| 703 | 6.31E-14 | -13.199705 | 0.45481178 | 3.661706 |
| 704 | 1.68E-11 | -10.774825 | 0.4672875  | 3.395961 |
| 705 | 4.26E-13 | -12.370401 | 0.47866695 | 3.606025 |
| 706 | 6.22E-13 | -12.206189 | 0.28785469 | 3.273929 |
| 707 | 1.56E-13 | -12.808249 | 0.53323327 | 3.462687 |
| 708 | 3.75E-16 | -15.426316 | 0.22828587 | 3.691525 |
| 709 | 1.56E-13 | -12.808249 | 0.5494697  | 3.460455 |
| 710 | 1.43E-12 | -11.84578  | -0.339209  | 2.462712 |
| 711 | 9.95E-12 | -11.002069 | 0.54047515 | 3.553107 |
| 712 | 1.58E-14 | -13.801765 | 0.48800902 | 3.697421 |
| 713 | 1.54E-10 | -9.8123561 | 0.64127288 | 3.424077 |
| 714 | 6.00E-15 | -14.222196 | -0.0974386 | 3.230465 |
| 715 | 1.35E-11 | -10.868904 | 0.51767666 | 3.263353 |
| 716 | 2.34E-15 | -14.631069 | 0.15776543 | 3.245465 |

---

---

|     |          |            |            |          |
|-----|----------|------------|------------|----------|
| 717 | 8.45E-13 | -12.073024 | 0.65422548 | 3.393971 |
| 718 | 1.05E-12 | -11.978945 | 0.1890879  | 3.173453 |
| 719 | 3.95E-15 | -14.403825 | -0.3379827 | 2.788811 |
| 720 | 4.50E-12 | -11.346823 | 0.54128118 | 3.434272 |
| 721 | 1.58E-14 | -13.801765 | 0.31359472 | 3.555367 |
| 722 | 1.94E-10 | -9.7126312 | 0.63892279 | 3.187662 |
| 723 | 2.28E-11 | -10.64166  | 1.05000123 | 3.732401 |
| 724 | 1.94E-10 | -9.7126312 | 1.04730912 | 3.42236  |
| 725 | 9.22E-14 | -13.035493 | 0.46188782 | 3.40979  |
| 726 | 1.07E-13 | -12.972461 | -0.1791683 | 3.023164 |
| 727 | 2.87E-11 | -10.541935 | 0.59387718 | 3.068948 |
| 728 | 2.87E-11 | -10.541935 | 0.86847707 | 3.314484 |
| 729 | 6.32E-16 | -15.199072 | -0.0602031 | 3.272608 |
| 730 | 8.97E-10 | -9.0470796 | 0.09122181 | 2.490566 |
| 731 | 2.66E-14 | -13.574521 | 0.24317933 | 3.434028 |
| 732 | 2.36E-11 | -10.627253 | -0.3161602 | 2.639881 |
| 733 | 2.87E-11 | -10.541935 | 0.55424747 | 3.070621 |
| 734 | 1.47E-12 | -11.831373 | 0.55058742 | 3.480246 |
| 735 | 1.51E-09 | -8.8198357 | 1.03821694 | 3.331429 |
| 736 | 1.56E-13 | -12.808249 | -0.1269658 | 2.85193  |
| 737 | 1.35E-11 | -10.868904 | 0.71184228 | 3.491833 |
| 738 | 6.22E-13 | -12.206189 | 0.20143109 | 3.108903 |
| 739 | 1.50E-15 | -14.824256 | 0.14670451 | 3.528205 |
| 740 | 4.05E-14 | -13.392892 | -0.4650692 | 2.776604 |
| 741 | 2.26E-16 | -15.646664 | 0.18121456 | 3.682807 |
| 742 | 2.53E-15 | -14.597012 | 0.11666555 | 3.472783 |
| 743 | 2.49E-12 | -11.604129 | 0.32441702 | 3.355717 |
| 744 | 6.00E-15 | -14.222196 | -0.0341495 | 3.417423 |
| 745 | 6.06E-09 | -8.2177758 | 0.73383192 | 2.972316 |
| 746 | 4.26E-13 | -12.370401 | -0.3949957 | 2.837013 |
| 747 | 3.95E-15 | -14.403825 | 0.06989554 | 3.169405 |
| 748 | 1.94E-10 | -9.7126312 | 0.75506999 | 3.271022 |
| 749 | 4.85E-11 | -10.314691 | 0.50261292 | 3.024294 |
| 750 | 2.87E-11 | -10.541935 | 0.71787913 | 3.162238 |
| 751 | 5.71E-12 | -11.24372  | 0.25162453 | 3.072078 |
| 752 | 3.74E-14 | -13.426949 | 0.3303221  | 3.527778 |
| 753 | 2.11E-13 | -12.675084 | 1.20245316 | 3.858648 |
| 754 | 2.53E-15 | -14.597012 | -0.4081501 | 2.965537 |
| 755 | 2.30E-14 | -13.637553 | 0.76794817 | 3.700176 |
| 756 | 9.37E-17 | -16.028376 | -0.0191896 | 3.362103 |
| 757 | 1.01E-14 | -13.994952 | 0.35187103 | 3.718012 |
| 758 | 9.95E-12 | -11.002069 | 0.80684929 | 3.759441 |
| 759 | 2.28E-11 | -10.64166  | -0.0284079 | 2.704429 |
| 760 | 5.71E-12 | -11.24372  | 0.22004191 | 2.941259 |
| 761 | 2.40E-14 | -13.620136 | -0.0647883 | 3.436758 |

---

---

|     |          |            |            |          |
|-----|----------|------------|------------|----------|
| 762 | 4.85E-11 | -10.314691 | 0.6809725  | 3.146825 |
| 763 | 2.87E-11 | -10.541935 | 1.04851541 | 3.556494 |
| 764 | 1.01E-14 | -13.994952 | 0.204712   | 3.572432 |
| 765 | 6.22E-13 | -12.206189 | 0.47487819 | 3.509377 |
| 766 | 1.50E-15 | -14.824256 | 0.55276825 | 4.011905 |
| 767 | 2.53E-15 | -14.597012 | 0.29542457 | 3.654244 |
| 768 | 6.22E-13 | -12.206189 | 0.79850406 | 3.693662 |
| 769 | 8.88E-16 | -15.0515   | 0.00264089 | 3.386905 |
| 770 | 3.04E-11 | -10.517519 | 0.36946725 | 3.356954 |
| 771 | 3.34E-17 | -16.475968 | 0.41903896 | 4.072261 |
| 772 | 6.22E-13 | -12.206189 | 0.26789428 | 3.141799 |
| 773 | 2.49E-12 | -11.604129 | 0.6699919  | 3.582195 |
| 774 | 6.60E-10 | -9.1802336 | 0.66342846 | 3.311424 |
| 775 | 5.71E-12 | -11.24372  | 0.61748634 | 3.251759 |
| 776 | 2.40E-14 | -13.620136 | -0.4346117 | 2.912216 |
| 777 | 1.51E-09 | -8.8198357 | 0.68892427 | 2.813333 |
| 778 | 1.58E-14 | -13.801765 | 0.62909732 | 3.849206 |
| 779 | 8.45E-13 | -12.073024 | 0.88462217 | 3.55619  |
| 780 | 1.58E-14 | -13.801765 | 0.22337916 | 3.371378 |
| 781 | 2.53E-13 | -12.597645 | 0.19471055 | 3.34065  |
| 782 | 6.83E-14 | -13.165648 | 0.12015638 | 3.476734 |
| 783 | 1.51E-09 | -8.8198357 | 0.74211254 | 2.928671 |
| 784 | 3.95E-15 | -14.403825 | 0.18273446 | 3.308489 |
| 785 | 6.31E-14 | -13.199705 | 0.60201716 | 3.84294  |
| 786 | 1.94E-10 | -9.7126312 | -0.0952495 | 2.436364 |
| 787 | 5.71E-12 | -11.24372  | 0.82427839 | 3.447612 |
| 788 | 9.59E-14 | -13.018076 | 0.00457117 | 3.345917 |
| 789 | 1.50E-15 | -14.824256 | -0.4983838 | 2.796737 |
| 790 | 1.46E-09 | -8.83548   | 0.71228248 | 3.429563 |
| 791 | 4.85E-11 | -10.314691 | 0.67265129 | 3.139385 |
| 792 | 1.21E-11 | -10.916751 | 0.43162783 | 2.890255 |
| 793 | 2.79E-10 | -9.5550498 | 0.66584615 | 3.447671 |
| 794 | 1.70E-12 | -11.768341 | 0.15375539 | 3.296752 |
| 795 | 2.42E-08 | -7.6157158 | 0.62219215 | 2.828904 |
| 796 | 3.75E-16 | -15.426316 | 0.28992962 | 3.713294 |
| 797 | 6.40E-09 | -8.19382   | 1.65742506 | 3.335681 |
| 798 | 3.81E-16 | -15.41942  | 0.20488491 | 3.793679 |
| 799 | 8.97E-10 | -9.0470796 | 0.46686325 | 2.749153 |
| 800 | 1.58E-14 | -13.801765 | 0.28974769 | 3.484127 |
| 801 | 7.75E-10 | -9.1105712 | 0.88672359 | 3.368927 |
| 802 | 1.51E-09 | -8.8198357 | 0.50485602 | 2.763617 |
| 803 | 3.38E-12 | -11.470964 | 0.17192423 | 2.877963 |
| 804 | 3.27E-10 | -9.4853874 | 0.99938148 | 3.37971  |
| 805 | 6.22E-13 | -12.206189 | 0.40828338 | 3.33626  |
| 806 | 1.47E-12 | -11.831373 | 0.48321986 | 3.542208 |

---

---

|     |          |            |            |          |
|-----|----------|------------|------------|----------|
| 807 | 4.85E-11 | -10.314691 | 0.64015685 | 3.060041 |
| 808 | 3.95E-15 | -14.403825 | 0.72908375 | 3.979905 |
| 809 | 2.40E-14 | -13.620136 | 0.08799924 | 3.507139 |
| 810 | 5.71E-12 | -11.24372  | 0.60830756 | 3.29324  |
| 811 | 6.00E-15 | -14.222196 | 0.19577323 | 3.629825 |
| 812 | 2.66E-14 | -13.574521 | 0.18037624 | 3.325285 |
| 813 | 1.62E-11 | -10.791465 | 0.49064991 | 3.722898 |
| 814 | 1.21E-11 | -10.916751 | 0.45892543 | 3.00484  |
| 815 | 1.62E-13 | -12.790832 | 0.32836168 | 3.831821 |
| 816 | 1.43E-12 | -11.84578  | 0.8612185  | 3.552448 |
| 817 | 1.58E-14 | -13.801765 | 0.65797266 | 3.816977 |
| 818 | 1.01E-12 | -11.995585 | 0.14783748 | 3.31049  |
| 819 | 1.62E-13 | -12.790832 | -0.0029562 | 3.297731 |
| 820 | 5.71E-12 | -11.24372  | 0.47093709 | 3.18042  |
| 821 | 5.55E-17 | -16.25562  | 0.22531149 | 3.639881 |
| 822 | 2.49E-12 | -11.604129 | -0.1803575 | 2.777778 |
| 823 | 5.71E-12 | -11.24372  | 0.63943285 | 3.400565 |
| 824 | 1.58E-14 | -13.801765 | 0.61802802 | 3.815385 |
| 825 | 2.53E-13 | -12.597645 | -0.0558836 | 3.133792 |
| 826 | 1.58E-14 | -13.801765 | 0.19081889 | 3.356643 |
| 827 | 9.35E-15 | -14.029009 | -0.0594022 | 3.031299 |
| 828 | 1.50E-15 | -14.824256 | -0.070792  | 3.459276 |
| 829 | 1.05E-12 | -11.978945 | 0.38385894 | 3.350694 |
| 830 | 5.71E-12 | -11.24372  | 0.69721777 | 3.415179 |
| 831 | 3.75E-16 | -15.426316 | 0.53976022 | 3.973893 |
| 832 | 1.43E-12 | -11.84578  | 0.01509211 | 2.681229 |
| 833 | 1.05E-12 | -11.978945 | 0.52550902 | 3.537853 |
| 834 | 3.38E-12 | -11.470964 | 0.71501241 | 3.377226 |
| 835 | 2.14E-15 | -14.669788 | 0.05295092 | 3.736237 |
| 836 | 1.07E-13 | -12.972461 | 0.13958853 | 3.301632 |
| 837 | 6.32E-16 | -15.199072 | 0.2921771  | 3.764407 |
| 838 | 2.53E-13 | -12.597645 | 0.51336803 | 3.724702 |
| 839 | 3.55E-15 | -14.44944  | -0.0366539 | 3.342262 |
| 840 | 3.75E-16 | -15.426316 | -0.1856166 | 3.195664 |
| 841 | 4.26E-13 | -12.370401 | -0.056518  | 3.111607 |
| 842 | 1.21E-10 | -9.9154588 | 0.7006682  | 3.716384 |
| 843 | 1.50E-15 | -14.824256 | 0.32514856 | 3.629825 |
| 844 | 7.75E-10 | -9.1105712 | 0.22377796 | 2.705004 |
| 845 | 3.75E-16 | -15.426316 | -0.0848108 | 3.310418 |
| 846 | 1.51E-09 | -8.8198357 | 0.20071902 | 2.562987 |
| 847 | 2.88E-12 | -11.541098 | 0.4322192  | 3.637401 |
| 848 | 3.81E-16 | -15.41942  | 0.03689419 | 3.593503 |
| 849 | 9.22E-14 | -13.035493 | 0.51917691 | 3.509254 |
| 850 | 3.95E-15 | -14.403825 | -0.1942341 | 2.984664 |
| 851 | 2.11E-13 | -12.675084 | 0.25799207 | 2.926839 |

---

---

|     |          |            |            |          |
|-----|----------|------------|------------|----------|
| 852 | 1.80E-11 | -10.744762 | 0.38359682 | 3.44026  |
| 853 | 1.56E-13 | -12.808249 | 0.06164173 | 2.967702 |
| 854 | 5.71E-12 | -11.24372  | 0.9501258  | 3.618525 |
| 855 | 1.07E-13 | -12.972461 | -0.0712724 | 3.095734 |
| 856 | 2.53E-15 | -14.597012 | 0.11004671 | 3.508929 |
| 857 | 6.32E-16 | -15.199072 | -0.2227205 | 3.088674 |
| 858 | 4.61E-13 | -12.336345 | -0.1525851 | 3.257062 |
| 859 | 9.02E-16 | -15.044604 | 0.36866617 | 4.012121 |
| 860 | 6.22E-13 | -12.206189 | 0.4246262  | 3.435028 |
| 861 | 2.28E-11 | -10.64166  | 0.61172432 | 3.374011 |
| 862 | 9.35E-15 | -14.029009 | 0.18277878 | 3.369048 |
| 863 | 1.47E-12 | -11.831373 | 0.24268271 | 3.207341 |
| 864 | 6.83E-14 | -13.165648 | 0.03528391 | 3.401865 |
| 865 | 4.27E-15 | -14.369768 | 0.14991001 | 3.489855 |
| 866 | 4.26E-13 | -12.370401 | 0.46292376 | 3.608282 |
| 867 | 3.95E-15 | -14.403825 | 0.30887488 | 3.574713 |
| 868 | 1.24E-08 | -7.9064512 | 0.80039314 | 3.235897 |
| 869 | 7.18E-12 | -11.143995 | 0.40158318 | 2.863477 |
| 870 | 2.66E-14 | -13.574521 | 0.02599873 | 3.140787 |
| 871 | 2.28E-11 | -10.64166  | 0.25740882 | 3.034463 |
| 872 | 1.79E-12 | -11.746055 | 0.6583437  | 3.109091 |
| 873 | 8.88E-16 | -15.0515   | -0.0555446 | 3.343733 |
| 874 | 5.55E-17 | -16.25562  | 0.2882173  | 3.735061 |
| 875 | 4.20E-12 | -11.376885 | -0.1814524 | 2.722153 |
| 876 | 1.94E-10 | -9.7126312 | 0.3585776  | 2.841492 |
| 877 | 6.22E-13 | -12.206189 | 0.2863861  | 3.17723  |
| 878 | 6.82E-12 | -11.166281 | 0.67935426 | 3.903274 |
| 879 | 2.53E-15 | -14.597012 | 0.13164428 | 3.430581 |
| 880 | 2.40E-14 | -13.620136 | 0.33583173 | 3.742657 |
| 881 | 2.28E-11 | -10.64166  | 0.55806783 | 3.195483 |
| 882 | 6.22E-13 | -12.206189 | 0.40025173 | 3.309731 |
| 883 | 4.85E-11 | -10.314691 | 0.19183226 | 2.785065 |
| 884 | 6.31E-14 | -13.199705 | -0.0235375 | 3.087785 |
| 885 | 1.58E-14 | -13.801765 | 0.3961745  | 3.577156 |
| 886 | 2.53E-13 | -12.597645 | 0.46259492 | 3.741077 |
| 887 | 3.69E-13 | -12.433433 | 0.2785611  | 3.205004 |
| 888 | 2.56E-09 | -8.5925919 | 0.70003248 | 2.909722 |
| 889 | 6.31E-14 | -13.199705 | -0.3353777 | 2.791608 |
| 890 | 6.82E-12 | -11.166281 | 0.07242551 | 3.318814 |
| 891 | 6.31E-14 | -13.199705 | 0.21436902 | 3.361721 |
| 892 | 6.31E-14 | -13.199705 | -0.208211  | 2.948413 |
| 893 | 6.60E-10 | -9.1802336 | 0.86024035 | 3.551515 |
| 894 | 8.45E-13 | -12.073024 | 0.62768968 | 3.368588 |
| 895 | 2.28E-11 | -10.64166  | 1.15564158 | 3.873612 |
| 896 | 8.45E-13 | -12.073024 | 0.45977116 | 3.151888 |

---

---

|     |          |            |            |          |
|-----|----------|------------|------------|----------|
| 897 | 7.18E-12 | -11.143995 | 1.14087857 | 3.522388 |
| 898 | 1.07E-13 | -12.972461 | -0.1834408 | 2.996298 |
| 899 | 9.22E-14 | -13.035493 | 0.76775365 | 3.719814 |
| 900 | 8.97E-10 | -9.0470796 | 0.87186523 | 2.977786 |
| 901 | 1.01E-14 | -13.994952 | 0.16538519 | 3.619774 |
| 902 | 1.31E-09 | -8.8833275 | 0.58545992 | 3.118572 |
| 903 | 1.70E-12 | -11.768341 | -0.0651319 | 3.146328 |
| 904 | 4.85E-11 | -10.314691 | 1.09276863 | 3.431322 |
| 905 | 9.13E-11 | -10.0396   | 0.57554507 | 3.24472  |
| 906 | 2.26E-16 | -15.646664 | 0.04215982 | 3.645833 |
| 907 | 3.38E-12 | -11.470964 | 0.88763056 | 3.638418 |
| 908 | 4.85E-11 | -10.314691 | 0.62352822 | 3.113696 |
| 909 | 2.34E-15 | -14.631069 | 0.39487203 | 3.575758 |
| 910 | 4.82E-12 | -11.31681  | -0.2881429 | 3.180294 |
| 911 | 2.14E-15 | -14.669788 | 0.16025119 | 3.894156 |
| 912 | 4.85E-11 | -10.314691 | 0.94977489 | 3.352063 |
| 913 | 2.87E-11 | -10.541935 | 1.02103257 | 3.450893 |
| 914 | 8.45E-13 | -12.073024 | 0.88532549 | 3.521909 |
| 915 | 2.66E-14 | -13.574521 | -0.5798073 | 2.529138 |
| 916 | 1.56E-13 | -12.808249 | 0.62306603 | 3.637288 |
| 917 | 3.95E-15 | -14.403825 | 0.0546439  | 3.190518 |
| 918 | 6.06E-09 | -8.2177758 | 0.34935944 | 2.687662 |
| 919 | 5.20E-12 | -11.283791 | -0.0943588 | 3.012008 |
| 920 | 3.38E-12 | -11.470964 | 0.86464202 | 3.555711 |
| 921 | 3.89E-14 | -13.410309 | 0.10818733 | 3.051282 |
| 922 | 1.43E-12 | -11.84578  | 0.05774693 | 2.804563 |
| 923 | 2.53E-15 | -14.597012 | 0.12679625 | 3.444053 |
| 924 | 1.44E-14 | -13.840484 | 0.19559119 | 3.967156 |
| 925 | 3.55E-15 | -14.44944  | 0.09389218 | 3.490575 |
| 926 | 9.22E-14 | -13.035493 | 0.47568628 | 3.423776 |
| 927 | 1.15E-10 | -9.9398751 | 0.35755485 | 2.857639 |
| 928 | 2.11E-13 | -12.675084 | 0.72838613 | 3.44494  |
| 929 | 1.01E-14 | -13.994952 | 0.32677404 | 3.830006 |
| 930 | 6.31E-14 | -13.199705 | 0.08869302 | 3.207867 |
| 931 | 7.18E-12 | -11.143995 | 0.4925367  | 3.055844 |
| 932 | 1.04E-09 | -8.9830523 | 1.08325829 | 3.764103 |
| 933 | 1.05E-12 | -11.978945 | 0.42961491 | 3.440113 |
| 934 | 3.59E-09 | -8.4450195 | 1.04853339 | 3.217345 |
| 935 | 9.35E-15 | -14.029009 | 0.03820664 | 3.101053 |
| 936 | 7.18E-12 | -11.143995 | 0.13720475 | 2.715668 |
| 937 | 1.62E-13 | -12.790832 | 0.10786366 | 3.506448 |
| 938 | 1.80E-11 | -10.744762 | 0.4914689  | 3.550649 |
| 939 | 1.07E-13 | -12.972461 | 0.5301333  | 3.700176 |
| 940 | 9.95E-12 | -11.002069 | 0.3799972  | 3.488688 |
| 941 | 2.49E-12 | -11.604129 | 0.59365688 | 3.487089 |

---

---

|     |          |            |            |          |
|-----|----------|------------|------------|----------|
| 942 | 2.11E-13 | -12.675084 | 0.44784528 | 3.123395 |
| 943 | 2.28E-11 | -10.64166  | 0.20903532 | 3.009074 |
| 944 | 3.89E-14 | -13.410309 | 0.01089096 | 3.109351 |
| 945 | 3.85E-11 | -10.414416 | 0.53928161 | 3.193662 |
| 946 | 3.89E-14 | -13.410309 | 0.53158197 | 3.424491 |
| 947 | 1.05E-12 | -11.978945 | 0.19725229 | 3.16121  |
| 948 | 7.75E-10 | -9.1105712 | 1.15019245 | 3.648052 |
| 949 | 2.34E-15 | -14.631069 | 0.15695475 | 3.32028  |
| 950 | 5.71E-12 | -11.24372  | 0.74082613 | 3.519661 |
| 951 | 6.60E-10 | -9.1802336 | 0.30373176 | 3.058699 |
| 952 | 6.06E-09 | -8.2177758 | 1.20964444 | 3.370056 |
| 953 | 2.53E-13 | -12.597645 | -0.1009857 | 3.023705 |
| 954 | 3.95E-15 | -14.403825 | 0.17632376 | 3.362103 |
| 955 | 1.14E-13 | -12.942399 | 0.26531083 | 3.457837 |
| 956 | 3.74E-14 | -13.426949 | 0.48524258 | 3.694444 |
| 957 | 5.23E-09 | -8.2812674 | 0.94386447 | 3.346795 |
| 958 | 6.00E-15 | -14.222196 | -0.2174101 | 3.136905 |
| 959 | 1.35E-11 | -10.868904 | 0.17546231 | 2.955932 |
| 960 | 1.43E-12 | -11.84578  | 0.30339278 | 3.003073 |
| 961 | 1.05E-12 | -11.978945 | 0.74009155 | 3.653002 |
| 962 | 1.07E-13 | -12.972461 | -0.1439515 | 2.923732 |
| 963 | 6.66E-15 | -14.176581 | 0.04537907 | 3.22123  |
| 964 | 5.99E-13 | -12.222829 | 0.08099507 | 3.281333 |
| 965 | 8.88E-16 | -15.0515   | 0.09126434 | 3.423602 |
| 966 | 4.27E-15 | -14.369768 | 0.06120844 | 3.389648 |
| 967 | 5.23E-09 | -8.2812674 | 1.07663885 | 3.581818 |
| 968 | 1.07E-13 | -12.972461 | 0.31121905 | 3.445963 |
| 969 | 9.22E-14 | -13.035493 | 0.50209639 | 3.394757 |
| 970 | 1.56E-13 | -12.808249 | 0.78896619 | 3.783712 |
| 971 | 1.05E-12 | -11.978945 | -0.1814643 | 2.83908  |
| 972 | 3.69E-13 | -12.433433 | 0.65017286 | 3.642517 |
| 973 | 1.43E-12 | -11.84578  | 0.22507768 | 3.094268 |
| 974 | 6.22E-13 | -12.206189 | 0.80439189 | 3.73705  |
| 975 | 3.74E-14 | -13.426949 | 0.19352705 | 3.283599 |
| 976 | 3.79E-10 | -9.4218958 | 0.60359193 | 2.829365 |
| 977 | 3.89E-14 | -13.410309 | -0.0136991 | 2.927739 |
| 978 | 3.38E-12 | -11.470964 | 0.9613555  | 3.731397 |
| 979 | 5.71E-12 | -11.24372  | 0.87770277 | 3.549605 |
| 980 | 1.56E-13 | -12.808249 | 0.08593002 | 3.010097 |
| 981 | 1.52E-15 | -14.81736  | 0.16873696 | 3.773427 |
| 982 | 1.58E-14 | -13.801765 | -0.0009174 | 3.290706 |
| 983 | 1.01E-12 | -11.995585 | -0.3008867 | 2.84871  |
| 984 | 1.50E-13 | -12.824889 | -0.0137512 | 3.117208 |
| 985 | 4.85E-11 | -10.314691 | 0.55807351 | 3.01958  |
| 986 | 7.18E-12 | -11.143995 | 0.9483856  | 3.303221 |

---



---

|      |          |            |            |          |
|------|----------|------------|------------|----------|
| 987  | 1.44E-08 | -7.8429596 | 0.4995482  | 2.813636 |
| 988  | 3.38E-12 | -11.470964 | 0.74082613 | 3.519661 |
| 989  | 2.28E-11 | -10.64166  | 0.26894935 | 2.987879 |
| 990  | 6.31E-14 | -13.199705 | 0.03766266 | 3.134977 |
| 991  | 1.94E-10 | -9.7126312 | 1.00149109 | 3.398156 |
| 992  | 3.38E-12 | -11.470964 | 0.35881026 | 3.131638 |
| 993  | 5.71E-12 | -11.24372  | 0.80059283 | 3.513889 |
| 994  | 8.88E-16 | -15.0515   | 0.21714221 | 3.654151 |
| 995  | 2.40E-14 | -13.620136 | -0.1665888 | 3.17296  |
| 996  | 2.30E-14 | -13.637553 | 0.59573287 | 3.545455 |
| 997  | 3.75E-16 | -15.426316 | 0.04998475 | 3.488136 |
| 998  | 5.28E-14 | -13.277144 | 0.55618143 | 3.243635 |
| 999  | 1.58E-14 | -13.801765 | 0.08001386 | 3.280275 |
| 1000 | 6.00E-15 | -14.222196 | 0.34170519 | 3.820904 |

---

**Table S4.** Composite Likelihood (CL) and Ratio (CLR) estimated in 1000 regions of 1kb taken randomly from the 3R chromosome in the datasets with (*FBti0019386* +) and without (*FBti0019386* -) the element.

| chr.start | chr.end  | dataset | sample_id | CL                   |                      | CLR   |
|-----------|----------|---------|-----------|----------------------|----------------------|-------|
|           |          |         |           | <i>FBti0019386</i> + | <i>FBti0019386</i> - |       |
| 20078025  | 20079025 | 568     | 586       | 4.45E-05             | 5.43E-18             | 8.56  |
| 12015987  | 12016987 | 941     | 971       | 1.58E-07             | 5.77E-19             | 4.63  |
| 20154668  | 20155668 | 539     | 554       | 1.36E-03             | 1.94E-10             | 3.98  |
| 16592452  | 16593452 | 636     | 657       | 4.13E-08             | 2.53E-18             | 2.83  |
| 12030464  | 12031464 | 133     | 136       | 1.59E-20             | 1.38E-42             | 2.26  |
| 264845    | 265845   | 408     | 422       | 1.00E+00             | 1.48E-01             | 0.83  |
| 353411    | 354411   | 176     | 179       | 8.19E-02             | 2.31E-03             | 0.46  |
| 2951623   | 2952623  | 134     | 137       | 1.56E-02             | 1.31E-04             | 0.27  |
| 185647    | 186647   | 404     | 418       | 1.00E+00             | 1.00E+00             | 0.00  |
| 2723396   | 2724396  | 415     | 429       | 1.56E-02             | 3.20E-04             | -0.12 |
| 21690092  | 21691092 | 710     | 732       | 2.50E-01             | 2.50E-01             | -0.60 |
| 3749567   | 3750567  | 945     | 975       | 3.91E-03             | 1.31E-04             | -0.93 |
| 134551    | 135551   | 679     | 701       | 3.70E-02             | 1.56E-02             | -1.06 |
| 7837217   | 7838217  | 521     | 536       | 3.70E-02             | 1.56E-02             | -1.06 |
| 516917    | 517917   | 580     | 598       | 3.20E-04             | 1.25E-06             | -1.09 |
| 25563991  | 25564991 | 293     | 300       | 2.50E-01             | 1.00E+00             | -1.20 |
| 10581903  | 10582903 | 380     | 393       | 2.14E-05             | 1.03E-08             | -1.35 |
| 578232    | 579232   | 992     | 1022      | 1.56E-02             | 8.64E-03             | -1.55 |
| 81752     | 82752    | 834     | 860       | 1.28E-03             | 6.10E-05             | -1.57 |
| 142216    | 143216   | 124     | 127       | 5.49E-03             | 1.28E-03             | -1.63 |
| 1984213   | 1985213  | 785     | 810       | 1.48E-01             | 1.00E+00             | -1.66 |
| 13994239  | 13995239 | 553     | 570       | 1.68E-03             | 1.31E-04             | -1.67 |
| 14576729  | 14577729 | 28      | 28        | 1.61E-06             | 1.54E-10             | -1.77 |
| 17300978  | 17301978 | 10      | 10        | 2.46E-09             | 5.43E-16             | -1.95 |
| 12128397  | 12129397 | 411     | 425       | 1.10E-08             | 1.90E-14             | -2.20 |
| 27843708  | 27844708 | 394     | 408       | 3.70E-02             | 2.50E-01             | -2.26 |
| 751957    | 752957   | 622     | 643       | 1.28E-03             | 3.43E-04             | -2.32 |
| 27551611  | 27552611 | 127     | 130       | 1.24E-03             | 3.43E-04             | -2.35 |
| 1294422   | 1295422  | 932     | 962       | 1.28E-03             | 4.12E-04             | -2.40 |
| 313386    | 314386   | 306     | 314       | 5.49E-03             | 1.52E-02             | -2.70 |
| 27482632  | 27483632 | 878     | 906       | 1.94E-05             | 2.38E-07             | -2.80 |
| 27555017  | 27556017 | 895     | 924       | 8.07E-06             | 4.13E-08             | -2.80 |
| 337231    | 338231   | 501     | 516       | 3.20E-04             | 8.57E-05             | -2.92 |
| 5589861   | 5590861  | 382     | 395       | 3.20E-04             | 8.57E-05             | -2.92 |
| 3741902   | 3742902  | 583     | 601       | 4.32E-08             | 1.70E-12             | -2.96 |
| 4103830   | 4104830  | 361     | 372       | 1.12E-06             | 1.31E-09             | -3.02 |
| 267400    | 268400   | 93      | 96        | 1.31E-04             | 1.94E-05             | -3.05 |
| 472634    | 473634   | 688     | 710       | 1.28E-03             | 2.31E-03             | -3.15 |
| 12124139  | 12125139 | 788     | 813       | 6.40E-09             | 6.31E-14             | -3.19 |

|          |          |     |      |          |          |       |
|----------|----------|-----|------|----------|----------|-------|
| 20135081 | 20136081 | 357 | 368  | 3.17E-16 | 2.62E-28 | -3.42 |
| 5161509  | 5162509  | 765 | 790  | 5.08E-11 | 7.81E-18 | -3.48 |
| 1736399  | 1737399  | 11  | 11   | 3.11E-04 | 3.43E-04 | -3.55 |
| 11313422 | 11314422 | 894 | 922  | 3.81E-06 | 5.54E-08 | -3.58 |
| 1393207  | 1394207  | 358 | 369  | 5.79E-04 | 1.28E-03 | -3.58 |
| 3719761  | 3720761  | 825 | 850  | 5.79E-04 | 1.28E-03 | -3.58 |
| 6174906  | 6175906  | 82  | 84   | 5.79E-04 | 1.28E-03 | -3.58 |
| 10768402 | 10769402 | 258 | 263  | 6.55E-06 | 1.65E-07 | -3.59 |
| 3724019  | 3725019  | 933 | 963  | 3.11E-04 | 5.79E-04 | -3.78 |
| 5967117  | 5968117  | 461 | 476  | 1.61E-06 | 2.42E-08 | -3.97 |
| 9843571  | 9844571  | 609 | 630  | 1.61E-06 | 2.56E-08 | -3.99 |
| 14514563 | 14515563 | 123 | 126  | 1.76E-19 | 3.19E-34 | -4.01 |
| 19947731 | 19948731 | 63  | 64   | 6.18E-23 | 4.62E-41 | -4.08 |
| 3735941  | 3736941  | 265 | 270  | 3.20E-04 | 1.28E-03 | -4.10 |
| 19792741 | 19793741 | 759 | 784  | 1.94E-05 | 4.86E-06 | -4.11 |
| 10707087 | 10708087 | 296 | 304  | 1.34E-06 | 2.94E-08 | -4.21 |
| 11670240 | 11671240 | 224 | 228  | 1.56E-11 | 4.95E-18 | -4.31 |
| 5876848  | 5877848  | 999 | 1029 | 1.28E-03 | 3.70E-02 | -4.35 |
| 10759035 | 10760035 | 913 | 942  | 7.49E-12 | 1.82E-18 | -4.51 |
| 12288497 | 12289497 | 959 | 989  | 8.57E-05 | 3.11E-04 | -4.63 |
| 1009138  | 1010138  | 317 | 325  | 9.54E-07 | 4.13E-08 | -4.66 |
| 8027973  | 8028973  | 920 | 949  | 6.06E-09 | 2.19E-12 | -4.78 |
| 20139339 | 20140339 | 43  | 43   | 2.38E-07 | 3.59E-09 | -4.80 |
| 8902560  | 8903560  | 733 | 758  | 9.54E-07 | 6.97E-08 | -4.88 |
| 11736664 | 11737664 | 370 | 382  | 4.38E-08 | 2.33E-10 | -5.08 |
| 17446600 | 17447600 | 110 | 113  | 6.82E-12 | 6.53E-18 | -5.15 |
| 383217   | 384217   | 947 | 977  | 1.28E-03 | 2.50E-01 | -5.18 |
| 4817465  | 4818465  | 188 | 191  | 6.61E-07 | 6.97E-08 | -5.20 |
| 6685010  | 6686010  | 526 | 541  | 1.21E-06 | 2.38E-07 | -5.21 |
| 27736407 | 27737407 | 255 | 259  | 1.21E-06 | 2.38E-07 | -5.21 |
| 16906690 | 16907690 | 640 | 661  | 8.46E-14 | 1.21E-21 | -5.23 |
| 16180    | 17180    | 151 | 154  | 7.77E-05 | 1.28E-03 | -5.33 |
| 14412372 | 14413372 | 118 | 121  | 1.24E-12 | 6.82E-19 | -5.64 |
| 8100359  | 8101359  | 665 | 687  | 2.24E-10 | 2.66E-14 | -5.72 |
| 7322854  | 7323854  | 369 | 381  | 1.28E-06 | 1.18E-06 | -5.86 |
| 3191773  | 3192773  | 773 | 798  | 5.79E-04 | 2.50E-01 | -5.87 |
| 10477157 | 10478157 | 558 | 576  | 2.57E-15 | 5.84E-24 | -5.94 |
| 402803   | 403803   | 163 | 166  | 3.28E-05 | 1.28E-03 | -6.08 |
| 6410797  | 6411797  | 520 | 535  | 8.07E-06 | 7.77E-05 | -6.08 |
| 4407849  | 4408849  | 245 | 249  | 3.69E-07 | 1.65E-07 | -6.08 |
| 2709771  | 2710771  | 754 | 779  | 2.56E-08 | 1.51E-09 | -6.36 |
| 709377   | 710377   | 633 | 654  | 1.80E-11 | 9.16E-16 | -6.45 |
| 19636899 | 19637899 | 336 | 346  | 1.94E-05 | 1.28E-03 | -6.53 |
| 2213292  | 2214292  | 218 | 222  | 4.86E-06 | 8.57E-05 | -6.56 |
| 7758018  | 7759018  | 778 | 803  | 4.86E-06 | 8.57E-05 | -6.56 |

|          |          |     |      |          |          |       |
|----------|----------|-----|------|----------|----------|-------|
| 5811275  | 5812275  | 996 | 1026 | 8.37E-08 | 2.56E-08 | -6.56 |
| 892470   | 893470   | 899 | 928  | 2.38E-07 | 2.38E-07 | -6.62 |
| 20062696 | 20063696 | 366 | 378  | 1.21E-11 | 6.78E-16 | -6.66 |
| 3496643  | 3497643  | 222 | 226  | 2.38E-07 | 2.92E-07 | -6.71 |
| 57908    | 58908    | 161 | 164  | 4.32E-08 | 1.08E-08 | -6.76 |
| 9264488  | 9265488  | 956 | 986  | 2.72E-09 | 4.85E-11 | -6.82 |
| 22194235 | 22195235 | 625 | 646  | 2.45E-12 | 3.99E-17 | -6.82 |
| 19106356 | 19107356 | 205 | 209  | 2.24E-10 | 3.57E-13 | -6.85 |
| 636992   | 637992   | 298 | 306  | 6.97E-08 | 4.13E-08 | -6.93 |
| 1287609  | 1288609  | 231 | 235  | 1.65E-07 | 2.79E-07 | -7.01 |
| 805607   | 806607   | 184 | 187  | 2.38E-07 | 6.61E-07 | -7.07 |
| 12309787 | 12310787 | 676 | 698  | 1.15E-10 | 1.62E-13 | -7.09 |
| 27773025 | 27774025 | 696 | 718  | 1.02E-08 | 1.31E-09 | -7.10 |
| 5506404  | 5507404  | 74  | 76   | 4.86E-06 | 3.20E-04 | -7.13 |
| 3830468  | 3831468  | 505 | 520  | 1.21E-06 | 2.14E-05 | -7.16 |
| 4628411  | 4629411  | 56  | 57   | 2.38E-07 | 9.54E-07 | -7.22 |
| 203530   | 204530   | 603 | 623  | 8.57E-05 | 1.48E-01 | -7.30 |
| 3070846  | 3071846  | 413 | 427  | 6.97E-08 | 1.02E-07 | -7.32 |
| 4897515  | 4898515  | 437 | 451  | 4.67E-06 | 5.79E-04 | -7.42 |
| 1994432  | 1995432  | 412 | 426  | 2.70E-09 | 1.94E-10 | -7.42 |
| 10717306 | 10718306 | 809 | 834  | 2.70E-09 | 1.94E-10 | -7.42 |
| 5355672  | 5356672  | 101 | 104  | 2.38E-07 | 1.61E-06 | -7.45 |
| 27410247 | 27411247 | 362 | 373  | 2.38E-07 | 1.61E-06 | -7.45 |
| 677017   | 678017   | 842 | 868  | 1.21E-06 | 4.35E-05 | -7.47 |
| 19812327 | 19813327 | 776 | 801  | 4.50E-12 | 7.20E-16 | -7.55 |
| 17289907 | 17290907 | 349 | 360  | 1.52E-15 | 1.12E-22 | -7.68 |
| 2972913  | 2973913  | 326 | 335  | 6.97E-08 | 2.38E-07 | -7.69 |
| 13112840 | 13113840 | 794 | 819  | 1.10E-08 | 6.04E-09 | -7.70 |
| 25773483 | 25774483 | 576 | 594  | 1.21E-06 | 8.57E-05 | -7.76 |
| 8263013  | 8264013  | 419 | 433  | 2.62E-06 | 5.79E-04 | -7.93 |
| 1472405  | 1473405  | 122 | 125  | 1.60E-09 | 2.24E-10 | -7.94 |
| 4090204  | 4091204  | 216 | 220  | 1.08E-08 | 1.08E-08 | -7.97 |
| 9482496  | 9483496  | 795 | 820  | 1.40E-09 | 1.94E-10 | -7.99 |
| 16046580 | 16047580 | 931 | 961  | 2.38E-07 | 6.44E-06 | -8.05 |
| 3010383  | 3011383  | 974 | 1004 | 7.75E-10 | 9.13E-11 | -8.18 |
| 12978288 | 12979288 | 966 | 996  | 7.52E-12 | 8.78E-15 | -8.19 |
| 27566940 | 27567940 | 574 | 592  | 7.18E-12 | 9.72E-15 | -8.28 |
| 9857197  | 9858197  | 644 | 665  | 1.51E-09 | 4.59E-10 | -8.30 |
| 20135933 | 20136933 | 130 | 133  | 3.02E-17 | 2.28E-25 | -8.40 |
| 12469035 | 12470035 | 375 | 388  | 7.83E-10 | 1.54E-10 | -8.40 |
| 591857   | 592857   | 140 | 143  | 6.06E-09 | 1.08E-08 | -8.47 |
| 17098298 | 17099298 | 76  | 78   | 6.50E-11 | 1.25E-12 | -8.47 |
| 20259414 | 20260414 | 810 | 835  | 6.97E-08 | 1.61E-06 | -8.52 |
| 21565759 | 21566759 | 150 | 153  | 1.51E-09 | 8.66E-10 | -8.58 |
| 8276639  | 8277639  | 954 | 984  | 4.13E-08 | 6.91E-07 | -8.61 |

|          |          |     |      |          |          |        |
|----------|----------|-----|------|----------|----------|--------|
| 7919821  | 7920821  | 268 | 273  | 4.26E-13 | 9.37E-17 | -8.71  |
| 18238582 | 18239582 | 88  | 91   | 6.31E-14 | 2.09E-18 | -8.72  |
| 15933318 | 15934318 | 482 | 497  | 1.10E-08 | 6.97E-08 | -8.76  |
| 3048705  | 3049705  | 263 | 268  | 1.21E-11 | 8.91E-14 | -8.78  |
| 7464218  | 7465218  | 930 | 960  | 2.53E-15 | 4.22E-21 | -8.82  |
| 6228556  | 6229556  | 917 | 946  | 3.95E-15 | 1.10E-20 | -8.85  |
| 1305493  | 1306493  | 416 | 430  | 1.03E-08 | 1.02E-07 | -8.98  |
| 8664966  | 8665966  | 643 | 664  | 6.91E-07 | 5.79E-04 | -9.08  |
| 20023523 | 20024523 | 550 | 567  | 1.44E-08 | 2.94E-07 | -9.15  |
| 8273232  | 8274232  | 305 | 313  | 2.38E-07 | 8.57E-05 | -9.18  |
| 5576235  | 5577235  | 581 | 599  | 4.10E-07 | 3.43E-04 | -9.31  |
| 21093976 | 21094976 | 911 | 940  | 9.24E-13 | 2.05E-15 | -9.38  |
| 2423635  | 2424635  | 697 | 719  | 1.03E-08 | 2.79E-07 | -9.42  |
| 16611187 | 16612187 | 165 | 168  | 8.18E-11 | 1.93E-11 | -9.46  |
| 9491012  | 9492012  | 417 | 431  | 1.79E-12 | 9.72E-15 | -9.48  |
| 3757231  | 3758231  | 614 | 635  | 3.59E-09 | 4.38E-08 | -9.53  |
| 23406053 | 23407053 | 286 | 293  | 1.39E-07 | 7.77E-05 | -9.60  |
| 5948382  | 5949382  | 995 | 1025 | 5.61E-11 | 1.35E-11 | -9.63  |
| 1745767  | 1746767  | 656 | 677  | 3.57E-13 | 5.49E-16 | -9.64  |
| 1802823  | 1803823  | 695 | 717  | 1.21E-11 | 7.14E-13 | -9.69  |
| 27631661 | 27632661 | 209 | 213  | 1.10E-08 | 6.61E-07 | -9.74  |
| 27499664 | 27500664 | 820 | 845  | 9.54E-07 | 5.12E-03 | -9.75  |
| 20342870 | 20343870 | 832 | 857  | 3.52E-31 | 9.44E-52 | -9.88  |
| 4570503  | 4571503  | 902 | 931  | 2.70E-09 | 5.96E-08 | -9.91  |
| 16945011 | 16946011 | 922 | 951  | 4.50E-12 | 1.76E-13 | -9.94  |
| 11713671 | 11714671 | 549 | 566  | 2.72E-09 | 8.37E-08 | -10.05 |
| 1765353  | 1766353  | 442 | 456  | 1.21E-11 | 1.70E-12 | -10.07 |
| 11723039 | 11724039 | 672 | 694  | 4.62E-14 | 3.18E-17 | -10.17 |
| 4060398  | 4061398  | 838 | 864  | 1.03E-08 | 1.61E-06 | -10.18 |
| 706822   | 707822   | 217 | 221  | 5.61E-11 | 4.85E-11 | -10.19 |
| 1231404  | 1232404  | 20  | 20   | 5.65E-07 | 5.49E-03 | -10.24 |
| 949526   | 950526   | 646 | 667  | 3.95E-15 | 2.70E-19 | -10.24 |
| 3346763  | 3347763  | 612 | 633  | 3.79E-10 | 2.58E-09 | -10.26 |
| 17489180 | 17490180 | 504 | 519  | 5.73E-18 | 6.74E-25 | -10.31 |
| 12806266 | 12807266 | 322 | 331  | 1.71E-15 | 6.75E-20 | -10.37 |
| 19089324 | 19090324 | 257 | 262  | 6.31E-14 | 9.66E-17 | -10.38 |
| 1850513  | 1851513  | 935 | 965  | 7.18E-12 | 1.79E-12 | -10.54 |
| 3781076  | 3782076  | 570 | 588  | 7.75E-10 | 2.09E-08 | -10.54 |
| 3781076  | 3782076  | 624 | 645  | 7.75E-10 | 2.09E-08 | -10.54 |
| 4241788  | 4242788  | 605 | 625  | 2.40E-14 | 2.03E-17 | -10.55 |
| 27250147 | 27251147 | 800 | 825  | 3.79E-10 | 6.06E-09 | -10.63 |
| 5927092  | 5928092  | 229 | 233  | 3.79E-10 | 6.40E-09 | -10.65 |
| 5731225  | 5732225  | 314 | 322  | 1.50E-15 | 1.01E-19 | -10.65 |
| 21174877 | 21175877 | 637 | 658  | 2.41E-12 | 2.62E-13 | -10.66 |
| 11052834 | 11053834 | 535 | 550  | 1.03E-08 | 4.86E-06 | -10.66 |

|          |          |     |      |          |          |        |
|----------|----------|-----|------|----------|----------|--------|
| 8290264  | 8291264  | 190 | 193  | 1.51E-09 | 1.39E-07 | -10.78 |
| 19952840 | 19953840 | 516 | 531  | 1.02E-16 | 6.46E-22 | -10.79 |
| 1148799  | 1149799  | 648 | 669  | 4.85E-11 | 1.54E-10 | -10.82 |
| 14741938 | 14742938 | 837 | 863  | 1.51E-20 | 1.53E-29 | -10.83 |
| 18875574 | 18876574 | 167 | 170  | 2.26E-16 | 3.45E-21 | -10.83 |
| 2181783  | 2182783  | 427 | 441  | 5.28E-14 | 2.22E-16 | -10.90 |
| 2047231  | 2048231  | 398 | 412  | 1.21E-11 | 1.21E-11 | -10.92 |
| 15762999 | 15763999 | 494 | 509  | 1.56E-22 | 2.32E-33 | -10.98 |
| 12448596 | 12449596 | 660 | 682  | 1.01E-14 | 1.02E-17 | -11.00 |
| 13212476 | 13213476 | 112 | 115  | 1.79E-12 | 3.69E-13 | -11.06 |
| 2617799  | 2618799  | 197 | 200  | 1.58E-14 | 3.43E-17 | -11.14 |
| 10006226 | 10007226 | 493 | 508  | 2.62E-13 | 1.01E-14 | -11.17 |
| 27853927 | 27854927 | 873 | 901  | 1.51E-09 | 3.59E-07 | -11.19 |
| 13106878 | 13107878 | 943 | 973  | 3.48E-19 | 2.63E-26 | -11.34 |
| 27765361 | 27766361 | 828 | 853  | 1.62E-13 | 5.76E-15 | -11.34 |
| 6889393  | 6890393  | 573 | 591  | 2.42E-16 | 1.40E-20 | -11.38 |
| 487111   | 488111   | 113 | 116  | 1.79E-12 | 7.71E-13 | -11.38 |
| 18771680 | 18772680 | 106 | 109  | 4.00E-10 | 4.13E-08 | -11.41 |
| 2812814  | 2813814  | 971 | 1001 | 1.21E-11 | 5.61E-11 | -11.58 |
| 18672043 | 18673043 | 46  | 46   | 1.54E-10 | 1.08E-08 | -11.66 |
| 755363   | 756363   | 454 | 468  | 4.13E-08 | 1.28E-03 | -11.88 |
| 7574926  | 7575926  | 790 | 815  | 8.88E-16 | 6.37E-19 | -11.91 |
| 1651240  | 1652240  | 691 | 713  | 6.06E-09 | 3.23E-05 | -11.94 |
| 1387246  | 1388246  | 905 | 934  | 4.85E-11 | 2.56E-09 | -12.04 |
| 5568571  | 5569571  | 908 | 937  | 5.61E-11 | 3.59E-09 | -12.06 |
| 1875209  | 1876209  | 944 | 974  | 2.41E-12 | 7.09E-12 | -12.09 |
| 8416300  | 8417300  | 745 | 770  | 1.18E-10 | 2.56E-08 | -12.26 |
| 21073538 | 21074538 | 736 | 761  | 2.81E-18 | 1.66E-23 | -12.32 |
| 17122143 | 17123143 | 812 | 837  | 6.97E-13 | 1.02E-12 | -12.32 |
| 889915   | 890915   | 55  | 56   | 1.39E-17 | 5.18E-22 | -12.43 |
| 2289083  | 2290083  | 206 | 210  | 9.87E-16 | 2.81E-18 | -12.46 |
| 19013532 | 19014532 | 67  | 68   | 2.81E-18 | 3.19E-23 | -12.61 |
| 11379846 | 11380846 | 340 | 350  | 1.38E-25 | 8.46E-38 | -12.64 |
| 7895976  | 7896976  | 111 | 114  | 3.57E-13 | 6.22E-13 | -12.69 |
| 23095221 | 23096221 | 774 | 799  | 1.40E-17 | 1.01E-21 | -12.71 |
| 12836923 | 12837923 | 214 | 218  | 2.04E-20 | 2.15E-27 | -12.72 |
| 6186828  | 6187828  | 758 | 783  | 3.79E-10 | 9.54E-07 | -12.82 |
| 20344573 | 20345573 | 593 | 611  | 1.01E-14 | 9.02E-16 | -12.95 |
| 16653766 | 16654766 | 331 | 341  | 1.44E-14 | 2.34E-15 | -13.05 |
| 4526220  | 4527220  | 350 | 361  | 4.93E-11 | 3.20E-08 | -13.12 |
| 20818911 | 20819911 | 793 | 818  | 1.75E-25 | 4.51E-37 | -13.17 |
| 3356982  | 3357982  | 579 | 597  | 2.88E-10 | 1.28E-06 | -13.19 |
| 10206350 | 10207350 | 242 | 246  | 6.31E-14 | 6.31E-14 | -13.20 |
| 22040948 | 22041948 | 189 | 192  | 2.62E-13 | 1.09E-12 | -13.20 |
| 837116   | 838116   | 243 | 247  | 2.72E-09 | 1.20E-04 | -13.21 |

|          |          |     |      |          |          |        |
|----------|----------|-----|------|----------|----------|--------|
| 24863130 | 24864130 | 973 | 1003 | 7.20E-11 | 1.02E-07 | -13.30 |
| 1819004  | 1820004  | 135 | 138  | 1.50E-13 | 5.48E-13 | -13.39 |
| 964855   | 965855   | 682 | 704  | 3.89E-14 | 3.89E-14 | -13.41 |
| 480298   | 481298   | 775 | 800  | 5.76E-15 | 8.88E-16 | -13.43 |
| 12114772 | 12115772 | 181 | 184  | 2.81E-18 | 2.53E-22 | -13.51 |
| 19483612 | 19484612 | 237 | 241  | 5.22E-19 | 9.98E-24 | -13.56 |
| 7478696  | 7479696  | 22  | 22   | 2.11E-13 | 1.79E-12 | -13.60 |
| 12477551 | 12478551 | 770 | 795  | 3.23E-13 | 4.68E-12 | -13.65 |
| 16106192 | 16107192 | 613 | 634  | 4.64E-11 | 1.02E-07 | -13.68 |
| 18760609 | 18761609 | 100 | 103  | 4.89E-22 | 1.37E-29 | -13.76 |
| 12417088 | 12418088 | 396 | 410  | 2.85E-14 | 5.28E-14 | -13.81 |
| 18404643 | 18405643 | 407 | 421  | 4.49E-13 | 1.35E-11 | -13.83 |
| 4647146  | 4648146  | 597 | 616  | 1.21E-11 | 1.02E-08 | -13.84 |
| 5238152  | 5239152  | 868 | 896  | 2.31E-14 | 3.74E-14 | -13.85 |
| 13290823 | 13291823 | 783 | 808  | 4.95E-18 | 1.78E-21 | -13.86 |
| 20188732 | 20189732 | 215 | 219  | 3.38E-12 | 8.97E-10 | -13.89 |
| 18634573 | 18635573 | 424 | 438  | 4.05E-27 | 1.41E-39 | -13.94 |
| 27633364 | 27634364 | 632 | 653  | 1.00E-10 | 9.54E-07 | -13.98 |
| 811568   | 812568   | 928 | 957  | 1.56E-13 | 2.39E-12 | -14.00 |
| 23408608 | 23409608 | 148 | 151  | 9.02E-16 | 8.30E-17 | -14.01 |
| 3276081  | 3277081  | 228 | 232  | 1.01E-14 | 1.38E-14 | -14.13 |
| 8125055  | 8126055  | 866 | 894  | 6.09E-15 | 6.00E-15 | -14.21 |
| 5016738  | 5017738  | 727 | 751  | 1.59E-14 | 5.28E-14 | -14.32 |
| 8219582  | 8220582  | 686 | 708  | 1.68E-11 | 6.97E-08 | -14.39 |
| 24348767 | 24349767 | 247 | 251  | 1.62E-18 | 7.04E-22 | -14.43 |
| 11173761 | 11174761 | 410 | 424  | 5.71E-12 | 1.08E-08 | -14.52 |
| 8224692  | 8225692  | 397 | 411  | 1.42E-11 | 7.13E-08 | -14.55 |
| 5459567  | 5460567  | 817 | 842  | 4.81E-10 | 8.57E-05 | -14.57 |
| 1022764  | 1023764  | 620 | 641  | 8.97E-10 | 3.20E-04 | -14.60 |
| 12606141 | 12607141 | 771 | 796  | 4.97E-20 | 9.96E-25 | -14.61 |
| 19866829 | 19867829 | 365 | 377  | 1.02E-17 | 5.59E-20 | -14.73 |
| 8797814  | 8798814  | 503 | 518  | 3.75E-16 | 7.59E-17 | -14.73 |
| 8806330  | 8807330  | 668 | 690  | 1.58E-16 | 1.39E-17 | -14.74 |
| 2016573  | 2017573  | 972 | 1002 | 4.34E-14 | 1.47E-12 | -14.89 |
| 9484199  | 9485199  | 982 | 1012 | 3.50E-12 | 1.08E-08 | -14.94 |
| 7821036  | 7822036  | 844 | 870  | 5.08E-18 | 2.36E-20 | -14.96 |
| 1640169  | 1641169  | 569 | 587  | 1.43E-12 | 2.56E-09 | -15.10 |
| 1855622  | 1856622  | 571 | 589  | 8.90E-17 | 1.12E-17 | -15.15 |
| 22874658 | 22875658 | 934 | 964  | 1.84E-12 | 5.61E-09 | -15.22 |
| 27268882 | 27269882 | 211 | 215  | 6.56E-14 | 7.18E-12 | -15.22 |
| 12773054 | 12774054 | 846 | 872  | 6.32E-16 | 7.19E-16 | -15.26 |
| 18785305 | 18786305 | 821 | 846  | 2.00E-18 | 8.14E-21 | -15.31 |
| 21137407 | 21138407 | 262 | 267  | 8.28E-21 | 1.50E-25 | -15.34 |
| 16789170 | 16790170 | 146 | 149  | 1.44E-15 | 5.76E-15 | -15.44 |
| 2122171  | 2123171  | 48  | 48   | 1.77E-12 | 9.46E-09 | -15.48 |

|          |          |     |      |          |          |        |
|----------|----------|-----|------|----------|----------|--------|
| 3060627  | 3061627  | 15  | 15   | 2.88E-14 | 2.88E-12 | -15.54 |
| 20834240 | 20835240 | 288 | 295  | 3.25E-16 | 4.26E-16 | -15.61 |
| 12155648 | 12156648 | 383 | 396  | 4.50E-12 | 1.02E-07 | -15.70 |
| 6214930  | 6215930  | 129 | 132  | 6.78E-16 | 2.53E-15 | -15.74 |
| 11845668 | 11846668 | 718 | 741  | 1.06E-23 | 6.93E-31 | -15.79 |
| 7953033  | 7954033  | 307 | 315  | 1.07E-16 | 7.59E-17 | -15.82 |
| 7871280  | 7872280  | 420 | 434  | 2.59E-17 | 4.95E-18 | -15.87 |
| 25753897 | 25754897 | 647 | 668  | 3.34E-17 | 8.36E-18 | -15.87 |
| 14270155 | 14271155 | 327 | 336  | 5.15E-20 | 2.00E-23 | -15.88 |
| 12865026 | 12866026 | 769 | 794  | 1.58E-14 | 2.49E-12 | -16.00 |
| 8674333  | 8675333  | 712 | 734  | 3.65E-17 | 1.39E-17 | -16.02 |
| 19741645 | 19742645 | 156 | 159  | 8.91E-14 | 9.13E-11 | -16.06 |
| 19807218 | 19808218 | 843 | 869  | 2.36E-16 | 6.52E-16 | -16.07 |
| 15367860 | 15368860 | 533 | 548  | 1.51E-17 | 2.73E-18 | -16.08 |
| 11513547 | 11514547 | 811 | 836  | 5.85E-18 | 5.22E-19 | -16.18 |
| 16352302 | 16353302 | 302 | 310  | 1.01E-14 | 1.79E-12 | -16.24 |
| 14558846 | 14559846 | 792 | 817  | 1.44E-15 | 3.74E-14 | -16.26 |
| 19240056 | 19241056 | 120 | 123  | 1.99E-15 | 7.32E-14 | -16.27 |
| 7254726  | 7255726  | 455 | 469  | 1.12E-12 | 2.56E-08 | -16.31 |
| 3035080  | 3036080  | 373 | 385  | 5.76E-15 | 8.45E-13 | -16.41 |
| 12685340 | 12686340 | 339 | 349  | 1.75E-24 | 7.83E-32 | -16.41 |
| 4894109  | 4895109  | 489 | 504  | 7.52E-12 | 1.61E-06 | -16.45 |
| 18415714 | 18416714 | 86  | 89   | 5.55E-17 | 9.52E-17 | -16.49 |
| 6906425  | 6907425  | 402 | 416  | 1.52E-15 | 7.32E-14 | -16.50 |
| 20457835 | 20458835 | 955 | 985  | 5.76E-15 | 1.05E-12 | -16.50 |
| 17889429 | 17890429 | 557 | 575  | 1.31E-29 | 9.26E-42 | -16.73 |
| 2218401  | 2219401  | 492 | 507  | 5.76E-15 | 1.79E-12 | -16.73 |
| 27688718 | 27689718 | 354 | 365  | 3.65E-17 | 9.37E-17 | -16.85 |
| 12274020 | 12275020 | 453 | 467  | 1.72E-17 | 2.09E-17 | -16.85 |
| 9259378  | 9260378  | 980 | 1010 | 1.73E-17 | 2.56E-17 | -16.93 |
| 2826439  | 2827439  | 431 | 445  | 2.22E-21 | 4.44E-25 | -16.95 |
| 6080379  | 6081379  | 423 | 437  | 6.31E-14 | 3.79E-10 | -16.98 |
| 8079921  | 8080921  | 483 | 498  | 3.52E-18 | 1.19E-18 | -16.98 |
| 6581116  | 6582116  | 545 | 561  | 2.71E-15 | 7.05E-13 | -16.98 |
| 15605454 | 15606454 | 714 | 736  | 9.02E-16 | 8.11E-14 | -17.00 |
| 20042258 | 20043258 | 114 | 117  | 2.36E-16 | 6.66E-15 | -17.08 |
| 20961127 | 20962127 | 169 | 172  | 1.76E-18 | 4.16E-19 | -17.13 |
| 2434706  | 2435706  | 143 | 146  | 4.93E-11 | 3.43E-04 | -17.15 |
| 2722545  | 2723545  | 807 | 832  | 9.35E-15 | 1.35E-11 | -17.19 |
| 27746626 | 27747626 | 906 | 935  | 2.42E-16 | 9.72E-15 | -17.22 |
| 13157122 | 13158122 | 699 | 721  | 4.02E-22 | 2.70E-26 | -17.22 |
| 9106091  | 9107091  | 300 | 308  | 3.57E-13 | 2.56E-08 | -17.30 |
| 7017132  | 7018132  | 631 | 652  | 5.85E-18 | 8.00E-18 | -17.37 |
| 1696374  | 1697374  | 508 | 523  | 3.81E-16 | 3.74E-14 | -17.41 |
| 4567097  | 4568097  | 602 | 622  | 1.46E-16 | 5.76E-15 | -17.43 |



|          |          |     |      |          |          |        |
|----------|----------|-----|------|----------|----------|--------|
| 12891425 | 12892425 | 958 | 988  | 2.47E-16 | 2.40E-14 | -17.60 |
| 12921231 | 12922231 | 171 | 174  | 2.19E-24 | 1.94E-30 | -17.61 |
| 12492028 | 12493028 | 761 | 786  | 1.90E-17 | 1.46E-16 | -17.61 |
| 4250304  | 4251304  | 462 | 477  | 3.14E-17 | 4.08E-16 | -17.62 |
| 8968133  | 8969133  | 16  | 16   | 9.22E-14 | 3.59E-09 | -17.63 |
| 5288396  | 5289396  | 337 | 347  | 3.19E-13 | 4.38E-08 | -17.63 |
| 18870465 | 18871465 | 984 | 1014 | 1.81E-25 | 1.45E-32 | -17.65 |
| 7704368  | 7705368  | 324 | 333  | 5.85E-16 | 1.56E-13 | -17.66 |
| 1171792  | 1172792  | 204 | 208  | 1.01E-14 | 5.61E-11 | -17.74 |
| 3843242  | 3844242  | 191 | 194  | 7.18E-12 | 3.28E-05 | -17.80 |
| 10567426 | 10568426 | 50  | 50   | 1.87E-21 | 2.61E-24 | -17.87 |
| 15958014 | 15959014 | 737 | 762  | 3.05E-20 | 7.18E-22 | -17.89 |
| 23250211 | 23251211 | 983 | 1013 | 1.36E-16 | 1.42E-14 | -17.89 |
| 2998461  | 2999461  | 829 | 854  | 1.02E-17 | 8.13E-17 | -17.89 |
| 7505947  | 7506947  | 405 | 419  | 7.92E-17 | 6.00E-15 | -17.98 |
| 19702472 | 19703472 | 144 | 147  | 9.65E-25 | 9.03E-31 | -17.99 |
| 20837646 | 20838646 | 681 | 703  | 3.49E-21 | 1.23E-23 | -18.00 |
| 5548133  | 5549133  | 269 | 274  | 1.07E-13 | 1.44E-08 | -18.10 |
| 1587370  | 1588370  | 560 | 578  | 5.55E-17 | 4.57E-15 | -18.17 |
| 12893128 | 12894128 | 225 | 229  | 3.60E-16 | 2.11E-13 | -18.21 |
| 17444045 | 17445045 | 942 | 972  | 5.20E-15 | 4.60E-11 | -18.23 |
| 558645   | 559645   | 748 | 773  | 3.28E-14 | 2.00E-09 | -18.27 |
| 3836429  | 3837429  | 693 | 715  | 3.57E-13 | 2.38E-07 | -18.27 |
| 11828636 | 11829636 | 487 | 502  | 1.71E-19 | 5.59E-20 | -18.28 |
| 1333595  | 1334595  | 862 | 890  | 9.72E-15 | 2.24E-10 | -18.38 |
| 4952017  | 4953017  | 986 | 1016 | 5.76E-15 | 9.46E-11 | -18.46 |
| 17108517 | 17109517 | 236 | 240  | 1.67E-18 | 8.36E-18 | -18.48 |
| 13367466 | 13368466 | 220 | 224  | 3.25E-16 | 3.57E-13 | -18.53 |
| 2700403  | 2701403  | 421 | 435  | 3.61E-15 | 4.85E-11 | -18.57 |
| 16248408 | 16249408 | 939 | 969  | 9.87E-16 | 4.50E-12 | -18.66 |
| 4372933  | 4373933  | 723 | 746  | 6.47E-18 | 2.48E-16 | -18.77 |
| 2371688  | 2372688  | 376 | 389  | 3.95E-17 | 9.72E-15 | -18.79 |
| 11674498 | 11675498 | 904 | 933  | 1.72E-19 | 1.92E-19 | -18.81 |
| 25414962 | 25415962 | 406 | 420  | 6.25E-22 | 2.95E-24 | -18.88 |
| 19871087 | 19872087 | 192 | 195  | 1.20E-20 | 1.56E-21 | -19.03 |
| 12641908 | 12642908 | 187 | 190  | 1.92E-19 | 4.04E-19 | -19.04 |
| 5420394  | 5421394  | 967 | 997  | 1.21E-15 | 1.62E-11 | -19.04 |
| 2272052  | 2273052  | 551 | 568  | 6.47E-13 | 4.67E-06 | -19.05 |
| 16105340 | 16106340 | 351 | 362  | 5.35E-16 | 3.38E-12 | -19.07 |
| 16364224 | 16365224 | 145 | 148  | 5.36E-15 | 3.79E-10 | -19.12 |
| 14678920 | 14679920 | 356 | 367  | 5.85E-16 | 5.71E-12 | -19.22 |
| 6528317  | 6529317  | 52  | 53   | 9.37E-17 | 1.56E-13 | -19.25 |
| 12375359 | 12376359 | 629 | 650  | 3.58E-18 | 3.04E-16 | -19.38 |
| 5559203  | 5560203  | 246 | 250  | 1.51E-18 | 7.92E-17 | -19.54 |
| 6094856  | 6095856  | 364 | 375  | 6.91E-17 | 1.73E-13 | -19.56 |

|          |          |     |      |          |          |        |
|----------|----------|-----|------|----------|----------|--------|
| 2822181  | 2823181  | 886 | 914  | 3.81E-16 | 7.18E-12 | -19.69 |
| 27882029 | 27883029 | 888 | 916  | 1.79E-13 | 2.64E-06 | -19.92 |
| 27755994 | 27756994 | 756 | 781  | 2.26E-16 | 4.50E-12 | -19.95 |
| 1269726  | 1270726  | 730 | 754  | 4.59E-20 | 2.24E-19 | -20.02 |
| 13498612 | 13499612 | 393 | 407  | 3.24E-25 | 1.16E-29 | -20.04 |
| 10446500 | 10447500 | 541 | 557  | 4.56E-19 | 2.34E-17 | -20.05 |
| 7034164  | 7035164  | 595 | 614  | 1.76E-18 | 3.86E-16 | -20.10 |
| 13989130 | 13990130 | 715 | 737  | 2.96E-19 | 1.43E-17 | -20.21 |
| 769840   | 770840   | 675 | 697  | 7.39E-16 | 9.13E-11 | -20.22 |
| 27724485 | 27725485 | 530 | 545  | 3.18E-19 | 1.98E-17 | -20.29 |
| 19876197 | 19877197 | 285 | 292  | 9.61E-30 | 1.82E-38 | -20.29 |
| 11617441 | 11618441 | 915 | 944  | 8.18E-21 | 1.38E-20 | -20.31 |
| 3775114  | 3776114  | 334 | 344  | 3.96E-21 | 4.17E-21 | -20.42 |
| 3805772  | 3806772  | 60  | 61   | 2.34E-15 | 1.51E-09 | -20.44 |
| 4831942  | 4832942  | 893 | 921  | 1.58E-16 | 7.18E-12 | -20.46 |
| 13180115 | 13181115 | 379 | 392  | 2.50E-21 | 1.91E-21 | -20.48 |
| 8205957  | 8206957  | 989 | 1019 | 9.52E-17 | 3.38E-12 | -20.57 |
| 809865   | 810865   | 969 | 999  | 4.73E-24 | 8.61E-27 | -20.58 |
| 7621763  | 7622763  | 663 | 685  | 1.83E-14 | 1.65E-07 | -20.69 |
| 20053328 | 20054328 | 968 | 998  | 3.45E-21 | 5.90E-21 | -20.69 |
| 26514370 | 26515370 | 865 | 893  | 7.72E-29 | 3.15E-36 | -20.72 |
| 13015758 | 13016758 | 936 | 966  | 3.19E-23 | 6.13E-25 | -20.78 |
| 4309915  | 4310915  | 180 | 183  | 9.82E-17 | 7.31E-12 | -20.88 |
| 23845475 | 23846475 | 630 | 651  | 5.11E-22 | 2.16E-22 | -20.92 |
| 4877077  | 4878077  | 994 | 1024 | 2.94E-18 | 9.72E-15 | -21.05 |
| 5485966  | 5486966  | 44  | 44   | 8.73E-22 | 8.73E-22 | -21.06 |
| 12693855 | 12694855 | 292 | 299  | 1.33E-19 | 2.03E-17 | -21.06 |
| 18225808 | 18226808 | 25  | 25   | 8.76E-21 | 9.31E-20 | -21.08 |
| 27803683 | 27804683 | 352 | 363  | 1.24E-18 | 2.34E-15 | -21.18 |
| 7295603  | 7296603  | 395 | 409  | 3.98E-22 | 2.47E-22 | -21.19 |
| 3369756  | 3370756  | 709 | 731  | 9.67E-16 | 1.51E-09 | -21.21 |
| 2672301  | 2673301  | 924 | 953  | 1.15E-20 | 2.24E-19 | -21.23 |
| 11484592 | 11485592 | 554 | 571  | 4.20E-21 | 3.93E-20 | -21.35 |
| 7659233  | 7660233  | 610 | 631  | 1.36E-18 | 6.00E-15 | -21.51 |
| 21609190 | 21610190 | 304 | 312  | 1.23E-27 | 4.89E-33 | -21.51 |
| 22316865 | 22317865 | 54  | 55   | 3.17E-16 | 3.50E-10 | -21.54 |
| 20229608 | 20230608 | 722 | 745  | 1.51E-26 | 8.32E-31 | -21.56 |
| 4607122  | 4608122  | 497 | 512  | 1.51E-17 | 8.45E-13 | -21.57 |
| 8703287  | 8704287  | 752 | 777  | 1.58E-16 | 1.15E-10 | -21.66 |
| 9153780  | 9154780  | 753 | 778  | 2.94E-29 | 4.61E-36 | -21.73 |
| 10361340 | 10362340 | 926 | 955  | 1.67E-18 | 1.55E-14 | -21.75 |
| 3963317  | 3964317  | 261 | 266  | 5.85E-18 | 2.11E-13 | -21.79 |
| 22396063 | 22397063 | 617 | 638  | 2.34E-21 | 3.95E-20 | -21.86 |
| 2574367  | 2575367  | 108 | 111  | 5.22E-19 | 2.34E-15 | -21.93 |
| 3052963  | 3053963  | 484 | 499  | 1.67E-18 | 2.66E-14 | -21.98 |

|          |          |     |      |          |          |        |
|----------|----------|-----|------|----------|----------|--------|
| 8886380  | 8887380  | 703 | 725  | 2.07E-21 | 4.39E-20 | -22.01 |
| 19323513 | 19324513 | 13  | 13   | 3.22E-24 | 1.09E-25 | -22.02 |
| 27706601 | 27707601 | 542 | 558  | 1.79E-22 | 4.47E-22 | -22.14 |
| 27706601 | 27707601 | 707 | 729  | 1.79E-22 | 4.47E-22 | -22.14 |
| 23391576 | 23392576 | 607 | 627  | 5.33E-16 | 4.16E-09 | -22.17 |
| 11082640 | 11083640 | 430 | 444  | 1.23E-17 | 2.31E-12 | -22.18 |
| 11082640 | 11083640 | 517 | 532  | 1.23E-17 | 2.31E-12 | -22.18 |
| 19234947 | 19235947 | 95  | 98   | 3.00E-21 | 2.21E-19 | -22.39 |
| 15174548 | 15175548 | 634 | 655  | 3.90E-22 | 4.22E-21 | -22.44 |
| 14638896 | 14639896 | 877 | 905  | 3.12E-27 | 3.05E-31 | -22.50 |
| 20341167 | 20342167 | 653 | 674  | 1.91E-33 | 1.46E-43 | -22.60 |
| 4033999  | 4034999  | 414 | 428  | 3.43E-17 | 4.85E-11 | -22.61 |
| 19650525 | 19651525 | 577 | 595  | 3.35E-27 | 4.75E-31 | -22.63 |
| 21792283 | 21793283 | 725 | 749  | 2.52E-25 | 3.06E-27 | -22.68 |
| 13557372 | 13558372 | 279 | 286  | 3.42E-26 | 5.67E-29 | -22.69 |
| 19446994 | 19447994 | 173 | 176  | 6.59E-23 | 2.36E-22 | -22.74 |
| 2238839  | 2239839  | 198 | 201  | 3.39E-17 | 6.72E-11 | -22.77 |
| 20852975 | 20853975 | 62  | 63   | 1.78E-21 | 1.92E-19 | -22.78 |
| 18446371 | 18447371 | 853 | 879  | 5.18E-22 | 1.85E-20 | -22.84 |
| 6509582  | 6510582  | 555 | 573  | 1.56E-27 | 1.81E-31 | -22.87 |
| 11876326 | 11877326 | 626 | 647  | 6.00E-15 | 2.80E-06 | -22.89 |
| 3333989  | 3334989  | 159 | 162  | 4.56E-19 | 1.83E-14 | -22.95 |
| 10325573 | 10326573 | 174 | 177  | 1.05E-21 | 9.98E-20 | -22.95 |
| 4179621  | 4180621  | 883 | 911  | 4.74E-18 | 2.41E-12 | -23.03 |
| 13651898 | 13652898 | 75  | 77   | 1.09E-21 | 1.28E-19 | -23.03 |
| 6523207  | 6524207  | 152 | 155  | 5.22E-19 | 3.89E-14 | -23.15 |
| 18560485 | 18561485 | 856 | 883  | 1.03E-24 | 1.75E-25 | -23.22 |
| 3362092  | 3363092  | 53  | 54   | 1.33E-19 | 3.71E-15 | -23.32 |
| 15732342 | 15733342 | 102 | 105  | 7.76E-30 | 1.35E-35 | -23.35 |
| 6045463  | 6046463  | 136 | 139  | 3.78E-16 | 3.22E-08 | -23.35 |
| 6045463  | 6046463  | 977 | 1007 | 3.78E-16 | 3.22E-08 | -23.35 |
| 8126758  | 8127758  | 89  | 92   | 4.81E-20 | 5.35E-16 | -23.36 |
| 21925131 | 21926131 | 847 | 873  | 3.73E-19 | 3.89E-14 | -23.45 |
| 16747442 | 16748442 | 443 | 457  | 1.62E-22 | 7.66E-21 | -23.47 |
| 12215260 | 12216260 | 290 | 297  | 4.37E-25 | 6.23E-26 | -23.51 |
| 5142774  | 5143774  | 871 | 899  | 4.41E-28 | 6.41E-32 | -23.52 |
| 15818353 | 15819353 | 141 | 144  | 3.36E-29 | 4.18E-34 | -23.57 |
| 25728349 | 25729349 | 319 | 327  | 6.13E-25 | 1.50E-25 | -23.60 |
| 16707417 | 16708417 | 374 | 387  | 1.92E-25 | 1.51E-26 | -23.61 |
| 20367566 | 20368566 | 253 | 257  | 8.94E-27 | 3.32E-29 | -23.62 |
| 8844652  | 8845652  | 422 | 436  | 5.22E-19 | 1.14E-13 | -23.62 |
| 20742268 | 20743268 | 949 | 979  | 2.52E-21 | 2.95E-18 | -23.67 |
| 6962630  | 6963630  | 70  | 72   | 5.55E-17 | 1.60E-09 | -23.72 |
| 20363309 | 20364309 | 79  | 81   | 2.43E-28 | 3.22E-32 | -23.74 |
| 24173339 | 24174339 | 671 | 693  | 1.71E-19 | 1.59E-14 | -23.74 |

|          |          |     |      |          |          |        |
|----------|----------|-----|------|----------|----------|--------|
| 27032139 | 27033139 | 172 | 175  | 8.36E-18 | 4.93E-11 | -23.85 |
| 9941505  | 9942505  | 618 | 639  | 1.36E-25 | 1.35E-26 | -23.86 |
| 15707646 | 15708646 | 294 | 302  | 1.60E-26 | 1.89E-28 | -23.87 |
| 10095643 | 10096643 | 221 | 225  | 1.19E-22 | 1.29E-20 | -23.96 |
| 1485179  | 1486179  | 652 | 673  | 1.41E-17 | 2.79E-10 | -24.15 |
| 8489537  | 8490537  | 879 | 907  | 1.03E-19 | 1.58E-14 | -24.17 |
| 11220598 | 11221598 | 99  | 102  | 4.16E-19 | 2.62E-13 | -24.18 |
| 18100624 | 18101624 | 154 | 157  | 6.43E-24 | 6.63E-23 | -24.21 |
| 2698700  | 2699700  | 284 | 291  | 1.66E-23 | 4.48E-22 | -24.21 |
| 13470509 | 13471509 | 272 | 277  | 4.77E-22 | 3.77E-19 | -24.22 |
| 13470509 | 13471509 | 360 | 371  | 4.77E-22 | 3.77E-19 | -24.22 |
| 6957520  | 6958520  | 611 | 632  | 8.28E-21 | 1.34E-16 | -24.29 |
| 4496414  | 4497414  | 979 | 1009 | 1.53E-15 | 4.86E-06 | -24.32 |
| 19114021 | 19115021 | 731 | 755  | 1.10E-24 | 2.84E-24 | -24.37 |
| 11637879 | 11638879 | 434 | 448  | 6.98E-28 | 1.32E-30 | -24.43 |
| 24243170 | 24244170 | 85  | 87   | 2.51E-27 | 1.84E-29 | -24.47 |
| 6506176  | 6507176  | 137 | 140  | 1.95E-28 | 1.14E-31 | -24.48 |
| 27084086 | 27085086 | 251 | 255  | 2.31E-22 | 1.71E-19 | -24.50 |
| 8090991  | 8091991  | 58  | 59   | 2.96E-25 | 3.24E-25 | -24.57 |
| 18933483 | 18934483 | 155 | 158  | 2.77E-30 | 2.98E-35 | -24.59 |
| 23218702 | 23219702 | 301 | 309  | 2.12E-18 | 1.80E-11 | -24.60 |
| 15091943 | 15092943 | 985 | 1015 | 1.72E-34 | 1.26E-43 | -24.63 |
| 23107995 | 23108995 | 529 | 544  | 4.49E-23 | 9.21E-21 | -24.66 |
| 18150868 | 18151868 | 903 | 932  | 1.10E-24 | 6.98E-24 | -24.76 |
| 23016875 | 23017875 | 687 | 709  | 3.66E-23 | 8.28E-21 | -24.79 |
| 4515149  | 4516149  | 244 | 248  | 3.10E-19 | 7.19E-13 | -24.87 |
| 3420851  | 3421851  | 182 | 185  | 2.56E-25 | 7.38E-25 | -25.05 |
| 21616003 | 21617003 | 128 | 131  | 3.80E-20 | 2.10E-14 | -25.16 |
| 11195902 | 11196902 | 698 | 720  | 1.12E-23 | 1.84E-21 | -25.17 |
| 11406246 | 11407246 | 23  | 23   | 9.37E-21 | 1.30E-15 | -25.17 |
| 15799618 | 15800618 | 21  | 21   | 8.94E-27 | 1.33E-27 | -25.22 |
| 11393472 | 11394472 | 287 | 294  | 6.33E-29 | 6.72E-32 | -25.23 |
| 10296619 | 10297619 | 104 | 107  | 3.21E-24 | 2.06E-22 | -25.30 |
| 23079041 | 23080041 | 36  | 36   | 4.20E-25 | 4.15E-24 | -25.37 |
| 9089059  | 9090059  | 14  | 14   | 1.56E-20 | 6.53E-15 | -25.43 |
| 10618522 | 10619522 | 496 | 511  | 8.96E-27 | 2.24E-27 | -25.45 |
| 11452232 | 11453232 | 199 | 202  | 1.03E-24 | 3.91E-23 | -25.56 |
| 18285420 | 18286420 | 923 | 952  | 7.57E-23 | 2.24E-19 | -25.59 |
| 19714394 | 19715394 | 515 | 530  | 1.12E-23 | 5.90E-21 | -25.67 |
| 8729687  | 8730687  | 323 | 332  | 1.60E-19 | 1.79E-12 | -25.85 |
| 11800534 | 11801534 | 818 | 843  | 2.12E-26 | 4.39E-26 | -25.99 |
| 19670963 | 19671963 | 645 | 666  | 1.56E-22 | 2.55E-18 | -26.02 |
| 25697692 | 25698692 | 29  | 29   | 5.90E-23 | 3.73E-19 | -26.03 |
| 2799188  | 2800188  | 885 | 913  | 2.52E-24 | 7.76E-22 | -26.09 |
| 11405394 | 11406394 | 289 | 296  | 6.13E-25 | 4.86E-23 | -26.11 |

|          |          |     |      |          |          |        |
|----------|----------|-----|------|----------|----------|--------|
| 26365341 | 26366341 | 694 | 716  | 1.89E-23 | 5.15E-20 | -26.16 |
| 16661431 | 16662431 | 24  | 24   | 1.07E-22 | 1.67E-18 | -26.16 |
| 10156106 | 10157106 | 739 | 764  | 8.14E-30 | 1.12E-32 | -26.23 |
| 10145887 | 10146887 | 321 | 330  | 1.85E-31 | 6.93E-36 | -26.31 |
| 4080837  | 4081837  | 657 | 678  | 1.23E-19 | 3.38E-12 | -26.35 |
| 3495792  | 3496792  | 705 | 727  | 1.05E-21 | 3.04E-16 | -26.44 |
| 17455116 | 17456116 | 960 | 990  | 4.31E-28 | 6.12E-29 | -26.52 |
| 16049986 | 16050986 | 273 | 278  | 8.23E-22 | 2.47E-16 | -26.56 |
| 18656715 | 18657715 | 27  | 27   | 2.95E-30 | 8.04E-33 | -26.97 |
| 12897386 | 12898386 | 869 | 897  | 6.47E-26 | 3.86E-24 | -26.97 |
| 13482431 | 13483431 | 230 | 234  | 1.08E-35 | 1.11E-43 | -26.98 |
| 24195480 | 24196480 | 998 | 1028 | 3.24E-25 | 1.11E-22 | -27.03 |
| 17291610 | 17292610 | 311 | 319  | 2.27E-41 | 6.03E-55 | -27.07 |
| 14300813 | 14301813 | 562 | 580  | 2.01E-25 | 4.86E-23 | -27.08 |
| 815826   | 816826   | 264 | 269  | 8.09E-24 | 9.43E-20 | -27.16 |
| 8620683  | 8621683  | 523 | 538  | 1.52E-20 | 3.57E-13 | -27.19 |
| 20917696 | 20918696 | 757 | 782  | 2.78E-25 | 1.28E-22 | -27.22 |
| 23779903 | 23780903 | 57  | 58   | 3.66E-26 | 2.29E-24 | -27.23 |
| 3988013  | 3989013  | 852 | 878  | 2.31E-22 | 9.37E-17 | -27.24 |
| 7326260  | 7327260  | 835 | 861  | 5.31E-21 | 6.56E-14 | -27.37 |
| 9661330  | 9662330  | 532 | 547  | 2.96E-25 | 2.18E-22 | -27.40 |
| 8362650  | 8363650  | 18  | 18   | 2.50E-20 | 1.70E-12 | -27.44 |
| 19590061 | 19591061 | 378 | 391  | 5.30E-27 | 1.05E-25 | -27.57 |
| 4803840  | 4804840  | 341 | 351  | 5.11E-22 | 9.93E-16 | -27.58 |
| 4810652  | 4811652  | 465 | 480  | 5.60E-22 | 1.21E-15 | -27.59 |
| 18765719 | 18766719 | 519 | 534  | 3.58E-26 | 6.52E-24 | -27.71 |
| 20530221 | 20531221 | 436 | 450  | 2.15E-33 | 2.55E-38 | -27.74 |
| 3097246  | 3098246  | 392 | 406  | 1.65E-23 | 1.51E-18 | -27.74 |
| 3812585  | 3813585  | 31  | 31   | 2.02E-26 | 2.34E-24 | -27.76 |
| 23648757 | 23649757 | 170 | 173  | 3.54E-28 | 8.80E-28 | -27.85 |
| 16274807 | 16275807 | 728 | 752  | 2.71E-25 | 5.25E-22 | -27.85 |
| 4691429  | 4692429  | 320 | 329  | 2.31E-26 | 3.86E-24 | -27.86 |
| 21288991 | 21289991 | 963 | 993  | 4.75E-31 | 1.72E-33 | -27.88 |
| 6969443  | 6970443  | 38  | 38   | 1.29E-22 | 1.34E-16 | -27.90 |
| 7118471  | 7119471  | 559 | 577  | 2.26E-21 | 4.34E-14 | -27.93 |
| 15110678 | 15111678 | 919 | 948  | 2.17E-23 | 4.05E-18 | -27.93 |
| 5398252  | 5399252  | 186 | 189  | 1.20E-22 | 1.28E-16 | -27.95 |
| 24150346 | 24151346 | 861 | 889  | 2.57E-31 | 6.33E-34 | -27.98 |
| 17530056 | 17531056 | 929 | 958  | 2.78E-23 | 7.81E-18 | -28.00 |
| 7137206  | 7138206  | 426 | 440  | 2.37E-25 | 6.28E-22 | -28.05 |
| 8937476  | 8938476  | 975 | 1005 | 7.03E-19 | 5.61E-09 | -28.06 |
| 7382465  | 7383465  | 962 | 992  | 1.36E-24 | 2.85E-20 | -28.19 |
| 23252766 | 23253766 | 855 | 882  | 1.92E-25 | 6.17E-22 | -28.22 |
| 8442700  | 8443700  | 248 | 252  | 3.36E-29 | 1.99E-29 | -28.25 |
| 2239691  | 2240691  | 115 | 118  | 2.26E-21 | 9.22E-14 | -28.26 |

|          |          |     |      |          |          |        |
|----------|----------|-----|------|----------|----------|--------|
| 9426290  | 9427290  | 565 | 583  | 3.40E-25 | 2.19E-21 | -28.28 |
| 8739906  | 8740906  | 677 | 699  | 9.88E-27 | 2.19E-24 | -28.35 |
| 19222173 | 19223173 | 851 | 877  | 2.09E-27 | 9.79E-26 | -28.35 |
| 21527437 | 21528437 | 751 | 776  | 1.76E-21 | 7.32E-14 | -28.37 |
| 8663262  | 8664262  | 784 | 809  | 2.40E-21 | 1.62E-13 | -28.45 |
| 13268681 | 13269681 | 762 | 787  | 6.62E-23 | 1.29E-16 | -28.47 |
| 6660314  | 6661314  | 720 | 743  | 1.65E-23 | 8.36E-18 | -28.49 |
| 17867287 | 17868287 | 403 | 417  | 3.56E-27 | 4.04E-25 | -28.51 |
| 17867287 | 17868287 | 606 | 626  | 3.56E-27 | 4.04E-25 | -28.51 |
| 5124039  | 5125039  | 651 | 672  | 1.22E-28 | 5.01E-28 | -28.53 |
| 20267078 | 20268078 | 863 | 891  | 7.03E-29 | 1.76E-28 | -28.55 |
| 8699029  | 8700029  | 540 | 555  | 1.54E-22 | 8.88E-16 | -28.57 |
| 14392785 | 14393785 | 548 | 565  | 4.43E-29 | 7.92E-29 | -28.61 |
| 7634537  | 7635537  | 91  | 94   | 2.31E-22 | 2.34E-15 | -28.64 |
| 14420036 | 14421036 | 7   | 7    | 5.63E-40 | 1.62E-50 | -28.71 |
| 10237859 | 10238859 | 744 | 769  | 1.95E-31 | 3.07E-33 | -28.91 |
| 16544762 | 16545762 | 45  | 45   | 3.84E-26 | 1.57E-22 | -29.03 |
| 18643089 | 18644089 | 260 | 265  | 1.65E-23 | 3.34E-17 | -29.09 |
| 6558974  | 6559974  | 543 | 559  | 6.03E-26 | 4.60E-22 | -29.10 |
| 18349289 | 18350289 | 4   | 4    | 2.36E-25 | 7.63E-21 | -29.14 |
| 11166948 | 11167948 | 511 | 526  | 5.52E-20 | 4.72E-10 | -29.19 |
| 1757689  | 1758689  | 98  | 101  | 9.88E-25 | 1.76E-19 | -29.25 |
| 8532117  | 8533117  | 880 | 908  | 3.09E-23 | 1.80E-16 | -29.28 |
| 18115101 | 18116101 | 916 | 945  | 5.51E-28 | 6.04E-26 | -29.30 |
| 5318202  | 5319202  | 444 | 458  | 1.20E-26 | 3.19E-23 | -29.35 |
| 10777770 | 10778770 | 210 | 214  | 1.25E-29 | 3.60E-29 | -29.36 |
| 2870722  | 2871722  | 282 | 289  | 3.02E-27 | 2.70E-24 | -29.47 |
| 20613677 | 20614677 | 281 | 288  | 1.11E-26 | 4.54E-23 | -29.57 |
| 14881600 | 14882600 | 742 | 767  | 1.90E-30 | 1.41E-30 | -29.59 |
| 26522034 | 26523034 | 997 | 1027 | 1.34E-28 | 8.94E-27 | -29.69 |
| 7036718  | 7037718  | 582 | 600  | 3.19E-23 | 5.85E-16 | -29.76 |
| 2394681  | 2395681  | 599 | 618  | 7.54E-22 | 3.57E-13 | -29.80 |
| 8554258  | 8555258  | 486 | 501  | 1.21E-31 | 9.73E-33 | -29.82 |
| 14047889 | 14048889 | 346 | 356  | 8.28E-29 | 5.30E-27 | -29.89 |
| 22706894 | 22707894 | 160 | 163  | 3.95E-32 | 1.24E-33 | -29.90 |
| 23668344 | 23669344 | 119 | 122  | 1.69E-32 | 2.38E-34 | -29.92 |
| 23454594 | 23455594 | 371 | 383  | 1.31E-31 | 2.97E-32 | -30.24 |
| 5204940  | 5205940  | 952 | 982  | 3.62E-25 | 2.67E-19 | -30.31 |
| 17819598 | 17820598 | 249 | 253  | 3.14E-27 | 2.07E-23 | -30.32 |
| 19210251 | 19211251 | 803 | 828  | 1.34E-28 | 4.39E-26 | -30.38 |
| 15305693 | 15306693 | 80  | 82   | 1.76E-32 | 8.00E-34 | -30.41 |
| 25030894 | 25031894 | 766 | 791  | 1.56E-24 | 6.47E-18 | -30.43 |
| 23463961 | 23464961 | 849 | 875  | 1.85E-25 | 1.01E-19 | -30.47 |
| 25925067 | 25926067 | 621 | 642  | 2.61E-23 | 2.34E-15 | -30.54 |
| 23303862 | 23304862 | 827 | 852  | 2.25E-30 | 1.84E-29 | -30.56 |

|          |          |     |     |          |          |        |
|----------|----------|-----|-----|----------|----------|--------|
| 21434613 | 21435613 | 740 | 765 | 2.37E-27 | 2.07E-23 | -30.57 |
| 24310445 | 24311445 | 457 | 472 | 1.11E-26 | 5.60E-22 | -30.66 |
| 6283058  | 6284058  | 467 | 482 | 1.02E-25 | 4.81E-20 | -30.66 |
| 6822968  | 6823968  | 741 | 766 | 1.55E-31 | 1.21E-31 | -30.71 |
| 12333631 | 12334631 | 274 | 279 | 1.76E-32 | 1.61E-33 | -30.72 |
| 5651175  | 5652175  | 202 | 205 | 1.66E-23 | 2.05E-15 | -30.87 |
| 5651175  | 5652175  | 267 | 272 | 1.66E-23 | 2.05E-15 | -30.87 |
| 8109726  | 8110726  | 951 | 981 | 2.73E-32 | 6.38E-33 | -30.93 |
| 1888834  | 1889834  | 252 | 256 | 8.75E-24 | 9.02E-16 | -31.07 |
| 5489373  | 5490373  | 254 | 258 | 3.95E-24 | 2.47E-16 | -31.20 |
| 25829689 | 25830689 | 450 | 464 | 2.73E-26 | 1.20E-20 | -31.21 |
| 16845375 | 16846375 | 329 | 338 | 1.05E-24 | 1.98E-17 | -31.25 |
| 23828443 | 23829443 | 433 | 447 | 1.87E-44 | 6.73E-57 | -31.28 |
| 20888742 | 20889742 | 303 | 311 | 1.58E-30 | 5.09E-29 | -31.31 |
| 25913145 | 25914145 | 92  | 95  | 9.79E-38 | 2.29E-43 | -31.38 |
| 20710759 | 20711759 | 787 | 812 | 1.31E-29 | 5.30E-27 | -31.49 |
| 17403169 | 17404169 | 673 | 695 | 3.43E-24 | 4.51E-16 | -31.58 |
| 16702307 | 16703307 | 777 | 802 | 1.02E-30 | 4.28E-29 | -31.61 |
| 15582461 | 15583461 | 669 | 691 | 1.31E-24 | 9.37E-17 | -31.74 |
| 6072714  | 6073714  | 178 | 181 | 2.55E-20 | 3.79E-08 | -31.76 |
| 21728413 | 21729413 | 600 | 619 | 4.91E-29 | 1.43E-25 | -31.77 |
| 11420723 | 11421723 | 466 | 481 | 4.07E-31 | 1.02E-29 | -31.79 |
| 9881893  | 9882893  | 12  | 12  | 1.92E-31 | 3.51E-30 | -31.98 |
| 12747506 | 12748506 | 513 | 528 | 4.31E-38 | 1.85E-43 | -32.00 |
| 7691594  | 7692594  | 764 | 789 | 1.04E-22 | 1.87E-12 | -32.23 |
| 21808463 | 21809463 | 814 | 839 | 2.27E-28 | 1.12E-23 | -32.34 |
| 22931715 | 22932715 | 524 | 539 | 2.25E-30 | 1.32E-27 | -32.42 |
| 25638080 | 25639080 | 68  | 69  | 1.05E-34 | 3.16E-36 | -32.46 |
| 3461728  | 3462728  | 32  | 32  | 1.34E-28 | 7.21E-24 | -32.60 |
| 9047331  | 9048331  | 250 | 254 | 1.34E-28 | 9.15E-24 | -32.70 |
| 13494354 | 13495354 | 623 | 644 | 7.22E-33 | 3.30E-32 | -32.80 |
| 8874458  | 8875458  | 717 | 739 | 8.86E-31 | 5.76E-28 | -32.87 |
| 18391869 | 18392869 | 226 | 230 | 3.25E-44 | 8.47E-55 | -32.91 |
| 24976392 | 24977392 | 896 | 925 | 3.50E-35 | 1.25E-36 | -33.01 |
| 16809608 | 16810608 | 49  | 49  | 8.85E-36 | 8.37E-38 | -33.03 |
| 8544039  | 8545039  | 961 | 991 | 1.58E-23 | 2.93E-13 | -33.07 |
| 22723075 | 22724075 | 78  | 80  | 6.57E-27 | 5.15E-20 | -33.08 |
| 24110321 | 24111321 | 527 | 542 | 4.49E-33 | 2.69E-32 | -33.13 |
| 6921753  | 6922753  | 77  | 79  | 2.33E-31 | 8.42E-29 | -33.19 |
| 21282178 | 21283178 | 561 | 579 | 2.74E-31 | 1.24E-28 | -33.22 |
| 21375853 | 21376853 | 615 | 636 | 5.18E-38 | 4.86E-42 | -33.26 |
| 27061093 | 27062093 | 338 | 348 | 3.80E-26 | 2.94E-18 | -33.31 |
| 2463660  | 2464660  | 510 | 525 | 8.84E-29 | 1.70E-23 | -33.34 |
| 20885335 | 20886335 | 2   | 2   | 7.44E-35 | 2.12E-35 | -33.58 |
| 10965972 | 10966972 | 854 | 880 | 5.76E-28 | 1.59E-21 | -33.68 |

|          |          |      |      |          |          |        |
|----------|----------|------|------|----------|----------|--------|
| 7949627  | 7950627  | 125  | 128  | 9.09E-34 | 4.07E-33 | -33.69 |
| 7949627  | 7950627  | 276  | 282  | 9.09E-34 | 4.07E-33 | -33.69 |
| 18171306 | 18172306 | 17   | 17   | 4.31E-31 | 9.73E-28 | -33.72 |
| 18622651 | 18623651 | 399  | 413  | 1.26E-35 | 8.57E-37 | -33.73 |
| 22442049 | 22443049 | 377  | 390  | 8.96E-27 | 4.37E-19 | -33.74 |
| 2615244  | 2616244  | 946  | 976  | 2.73E-30 | 4.38E-26 | -33.77 |
| 9407555  | 9408555  | 463  | 478  | 1.46E-25 | 1.34E-16 | -33.80 |
| 4965642  | 4966642  | 937  | 967  | 7.32E-27 | 3.77E-19 | -33.85 |
| 16844523 | 16845523 | 546  | 562  | 6.14E-26 | 2.86E-17 | -33.88 |
| 19613054 | 19614054 | 59   | 60   | 1.88E-37 | 2.89E-40 | -33.91 |
| 18098921 | 18099921 | 8    | 8    | 6.73E-33 | 4.31E-31 | -33.98 |
| 25443917 | 25444917 | 683  | 705  | 6.93E-31 | 6.04E-27 | -34.10 |
| 20571949 | 20572949 | 459  | 474  | 6.42E-38 | 5.80E-41 | -34.15 |
| 12944224 | 12945224 | 528  | 543  | 5.65E-38 | 4.74E-41 | -34.17 |
| 15864339 | 15865339 | 468  | 483  | 1.96E-28 | 6.64E-22 | -34.24 |
| 26304026 | 26305026 | 239  | 243  | 9.09E-34 | 1.91E-32 | -34.36 |
| 23857398 | 23858398 | 400  | 414  | 8.77E-27 | 2.09E-18 | -34.43 |
| 24475655 | 24476655 | 456  | 471  | 1.08E-31 | 3.19E-28 | -34.43 |
| 18393572 | 18394572 | 743  | 768  | 3.21E-30 | 3.24E-25 | -34.50 |
| 9263636  | 9264636  | 586  | 604  | 6.10E-31 | 1.45E-26 | -34.59 |
| 11780947 | 11781947 | 109  | 112  | 1.58E-25 | 1.27E-15 | -34.71 |
| 11780947 | 11781947 | 892  | 920  | 1.58E-25 | 1.27E-15 | -34.71 |
| 11419020 | 11420020 | 446  | 460  | 6.08E-29 | 1.95E-22 | -34.72 |
| 17231998 | 17232998 | 721  | 744  | 4.21E-26 | 9.54E-17 | -34.73 |
| 9793327  | 9794327  | 841  | 867  | 2.47E-32 | 3.53E-29 | -34.76 |
| 19889822 | 19890822 | 772  | 797  | 2.08E-30 | 2.68E-25 | -34.79 |
| 14273562 | 14274562 | 836  | 862  | 9.02E-32 | 5.21E-28 | -34.81 |
| 3160264  | 3161264  | 438  | 452  | 3.10E-29 | 6.62E-23 | -34.84 |
| 11258920 | 11259920 | 451  | 465  | 1.42E-28 | 1.59E-21 | -34.90 |
| 23187193 | 23188193 | 1000 | 1030 | 3.31E-36 | 9.28E-37 | -34.93 |
| 13906525 | 13907525 | 73   | 75   | 7.77E-37 | 5.74E-38 | -34.98 |
| 24306187 | 24307187 | 666  | 688  | 6.38E-39 | 4.09E-42 | -35.00 |
| 24244021 | 24245021 | 823  | 848  | 1.12E-34 | 1.28E-33 | -35.01 |
| 24875052 | 24876052 | 333  | 343  | 3.43E-40 | 1.35E-44 | -35.06 |
| 7961549  | 7962549  | 870  | 898  | 5.25E-33 | 4.20E-30 | -35.18 |
| 15147297 | 15148297 | 41   | 41   | 1.82E-31 | 5.30E-27 | -35.20 |
| 15147297 | 15148297 | 848  | 874  | 1.82E-31 | 5.30E-27 | -35.20 |
| 9554029  | 9555029  | 19   | 19   | 2.62E-34 | 1.17E-32 | -35.23 |
| 22780131 | 22781131 | 716  | 738  | 1.09E-29 | 2.09E-23 | -35.24 |
| 18727397 | 18728397 | 445  | 459  | 1.32E-33 | 3.50E-31 | -35.30 |
| 12731326 | 12732326 | 312  | 320  | 3.81E-29 | 3.03E-22 | -35.32 |
| 9363272  | 9364272  | 564  | 582  | 1.62E-26 | 5.55E-17 | -35.33 |
| 18936037 | 18937037 | 381  | 394  | 9.65E-36 | 2.69E-35 | -35.46 |
| 14554588 | 14555588 | 594  | 612  | 1.12E-33 | 4.85E-31 | -35.59 |
| 4968197  | 4969197  | 87   | 90   | 4.01E-27 | 8.36E-18 | -35.72 |



|          |          |     |      |          |          |        |
|----------|----------|-----|------|----------|----------|--------|
| 24293414 | 24294414 | 670 | 692  | 1.69E-32 | 1.52E-28 | -35.72 |
| 23940854 | 23941854 | 833 | 858  | 1.43E-34 | 2.31E-32 | -36.05 |
| 24116282 | 24117282 | 898 | 927  | 2.78E-32 | 8.95E-28 | -36.06 |
| 16895619 | 16896619 | 401 | 415  | 3.58E-32 | 1.95E-27 | -36.18 |
| 14194364 | 14195364 | 449 | 463  | 4.51E-34 | 3.29E-31 | -36.21 |
| 16331012 | 16332012 | 655 | 676  | 3.99E-33 | 3.36E-29 | -36.32 |
| 5468934  | 5469934  | 5   | 5    | 1.89E-28 | 9.31E-20 | -36.42 |
| 16187945 | 16188945 | 485 | 500  | 5.24E-29 | 9.02E-21 | -36.52 |
| 18861097 | 18862097 | 105 | 108  | 2.07E-29 | 2.07E-21 | -36.68 |
| 14431107 | 14432107 | 948 | 978  | 7.97E-29 | 3.27E-20 | -36.71 |
| 10512924 | 10513924 | 389 | 403  | 7.99E-40 | 3.78E-42 | -36.77 |
| 17684195 | 17685195 | 208 | 212  | 9.43E-48 | 5.59E-58 | -36.80 |
| 22944489 | 22945489 | 39  | 39   | 4.80E-38 | 1.51E-38 | -36.82 |
| 23538050 | 23539050 | 965 | 995  | 2.69E-29 | 5.72E-21 | -36.90 |
| 26516925 | 26517925 | 343 | 353  | 3.03E-33 | 8.17E-29 | -36.95 |
| 22395211 | 22396211 | 590 | 608  | 5.48E-28 | 3.08E-18 | -37.01 |
| 17037835 | 17038835 | 240 | 244  | 1.36E-37 | 2.24E-37 | -37.08 |
| 19142975 | 19143975 | 235 | 239  | 2.70E-40 | 8.77E-43 | -37.08 |
| 20533627 | 20534627 | 858 | 885  | 2.16E-33 | 6.13E-29 | -37.12 |
| 10227640 | 10228640 | 840 | 866  | 5.31E-36 | 3.83E-34 | -37.13 |
| 17575191 | 17576191 | 506 | 521  | 7.76E-30 | 1.05E-21 | -37.24 |
| 4099572  | 4100572  | 876 | 904  | 4.73E-35 | 4.52E-32 | -37.31 |
| 18161087 | 18162087 | 193 | 196  | 1.07E-41 | 2.67E-45 | -37.37 |
| 18161087 | 18162087 | 719 | 742  | 1.07E-41 | 2.67E-45 | -37.37 |
| 18061451 | 18062451 | 755 | 780  | 1.93E-29 | 1.00E-20 | -37.43 |
| 19269011 | 19270011 | 760 | 785  | 1.74E-35 | 8.40E-33 | -37.44 |
| 10164622 | 10165622 | 750 | 775  | 4.10E-36 | 4.82E-34 | -37.46 |
| 17110221 | 17111221 | 608 | 629  | 1.76E-30 | 1.80E-22 | -37.76 |
| 9669846  | 9670846  | 556 | 574  | 4.22E-30 | 1.05E-21 | -37.77 |
| 26944425 | 26945425 | 342 | 352  | 2.01E-33 | 3.14E-28 | -37.89 |
| 26451352 | 26452352 | 801 | 826  | 6.04E-37 | 3.52E-35 | -37.98 |
| 22707746 | 22708746 | 153 | 156  | 1.09E-36 | 1.39E-34 | -38.07 |
| 5922834  | 5923834  | 907 | 936  | 1.82E-31 | 4.15E-24 | -38.10 |
| 8603651  | 8604651  | 536 | 551  | 3.31E-30 | 1.39E-21 | -38.10 |
| 23207632 | 23208632 | 798 | 823  | 1.95E-32 | 4.84E-26 | -38.11 |
| 18809150 | 18810150 | 81  | 83   | 1.79E-43 | 4.46E-48 | -38.14 |
| 21017332 | 21018332 | 94  | 97   | 1.96E-36 | 5.63E-34 | -38.16 |
| 13736206 | 13737206 | 658 | 679  | 1.37E-38 | 3.12E-38 | -38.22 |
| 13926963 | 13927963 | 912 | 941  | 3.90E-36 | 2.75E-33 | -38.26 |
| 24842691 | 24843691 | 970 | 1000 | 2.27E-34 | 9.33E-30 | -38.26 |
| 14049593 | 14050593 | 604 | 624  | 3.63E-39 | 3.35E-39 | -38.41 |
| 4011006  | 4012006  | 316 | 324  | 1.50E-32 | 6.47E-26 | -38.46 |
| 16854742 | 16855742 | 232 | 236  | 3.52E-35 | 5.14E-31 | -38.62 |
| 9767779  | 9768779  | 391 | 405  | 1.66E-41 | 1.18E-43 | -38.63 |
| 16207531 | 16208531 | 498 | 513  | 3.97E-28 | 6.91E-17 | -38.64 |

|          |          |     |     |          |          |        |
|----------|----------|-----|-----|----------|----------|--------|
| 25922512 | 25923512 | 887 | 915 | 6.27E-36 | 2.63E-32 | -38.83 |
| 8482725  | 8483725  | 6   | 6   | 4.01E-34 | 1.24E-28 | -38.89 |
| 13586326 | 13587326 | 147 | 150 | 1.16E-32 | 1.05E-25 | -38.89 |
| 13567591 | 13568591 | 708 | 730 | 8.34E-37 | 5.63E-34 | -38.91 |
| 16778951 | 16779951 | 227 | 231 | 2.05E-37 | 6.86E-35 | -39.21 |
| 15973343 | 15974343 | 639 | 660 | 1.00E-34 | 1.73E-29 | -39.24 |
| 17914125 | 17915125 | 724 | 747 | 6.73E-40 | 8.13E-40 | -39.25 |
| 22616626 | 22617626 | 628 | 649 | 2.13E-33 | 8.61E-27 | -39.28 |
| 15992930 | 15993930 | 51  | 51  | 1.04E-32 | 2.09E-25 | -39.28 |
| 9219353  | 9220353  | 589 | 607 | 3.04E-32 | 2.80E-24 | -39.48 |
| 9278113  | 9279113  | 701 | 723 | 1.20E-32 | 4.41E-25 | -39.49 |
| 4713571  | 4714571  | 318 | 326 | 6.27E-36 | 1.66E-31 | -39.63 |
| 18789563 | 18790563 | 734 | 759 | 6.24E-33 | 1.91E-25 | -39.69 |
| 14584394 | 14585394 | 918 | 947 | 3.20E-38 | 5.29E-36 | -39.71 |
| 10980449 | 10981449 | 310 | 318 | 6.80E-47 | 2.57E-53 | -39.74 |
| 6247291  | 6248291  | 90  | 93  | 7.28E-39 | 3.01E-37 | -39.75 |
| 15172845 | 15173845 | 34  | 34  | 1.02E-36 | 6.18E-33 | -39.77 |
| 26448797 | 26449797 | 525 | 540 | 3.01E-38 | 5.78E-36 | -39.81 |
| 18998204 | 18999204 | 667 | 689 | 1.45E-47 | 1.52E-54 | -39.86 |
| 22172094 | 22173094 | 802 | 827 | 2.58E-34 | 5.76E-28 | -39.94 |
| 18564743 | 18565743 | 432 | 446 | 1.43E-34 | 1.85E-28 | -39.95 |
| 21817831 | 21818831 | 387 | 401 | 4.78E-32 | 2.07E-23 | -39.96 |
| 23428194 | 23429194 | 418 | 432 | 1.83E-38 | 3.57E-36 | -40.03 |
| 21369041 | 21370041 | 61  | 62  | 4.46E-47 | 2.81E-53 | -40.15 |
| 26156701 | 26157701 | 166 | 169 | 2.98E-33 | 1.27E-25 | -40.15 |
| 21246411 | 21247411 | 690 | 712 | 3.69E-36 | 2.43E-31 | -40.25 |
| 18562188 | 18563188 | 359 | 370 | 2.26E-38 | 1.62E-35 | -40.50 |
| 18565594 | 18566594 | 509 | 524 | 7.21E-37 | 2.69E-32 | -40.71 |
| 13943995 | 13944995 | 241 | 245 | 6.97E-39 | 2.76E-36 | -40.75 |
| 16061909 | 16062909 | 661 | 683 | 6.71E-24 | 2.89E-06 | -40.81 |
| 18884942 | 18885942 | 439 | 453 | 2.20E-36 | 4.43E-31 | -40.96 |
| 10575090 | 10576090 | 270 | 275 | 2.49E-37 | 6.73E-33 | -41.03 |
| 6971997  | 6972997  | 805 | 830 | 9.81E-36 | 1.18E-29 | -41.09 |
| 15997188 | 15998188 | 478 | 493 | 9.47E-45 | 1.25E-47 | -41.14 |
| 19917925 | 19918925 | 116 | 119 | 2.08E-49 | 6.43E-57 | -41.17 |
| 14288891 | 14289891 | 185 | 188 | 6.90E-37 | 8.44E-32 | -41.25 |
| 14288891 | 14289891 | 275 | 281 | 6.90E-37 | 8.44E-32 | -41.25 |
| 21584494 | 21585494 | 537 | 552 | 2.52E-44 | 1.31E-46 | -41.32 |
| 22299833 | 22300833 | 940 | 970 | 6.29E-38 | 9.09E-34 | -41.36 |
| 9830797  | 9831797  | 910 | 939 | 1.32E-38 | 5.94E-35 | -41.53 |
| 16115559 | 16116559 | 704 | 726 | 7.75E-41 | 2.07E-39 | -41.54 |
| 10512072 | 10513072 | 131 | 134 | 1.57E-42 | 9.46E-43 | -41.58 |
| 26996372 | 26997372 | 779 | 804 | 1.44E-38 | 1.05E-34 | -41.70 |
| 18572407 | 18573407 | 291 | 298 | 4.03E-34 | 9.21E-26 | -41.75 |
| 14615903 | 14616903 | 330 | 339 | 7.59E-44 | 5.51E-45 | -41.98 |

|          |          |     |     |          |          |        |
|----------|----------|-----|-----|----------|----------|--------|
| 22139733 | 22140733 | 372 | 384 | 7.67E-35 | 5.77E-27 | -41.99 |
| 21185948 | 21186948 | 441 | 455 | 1.68E-53 | 4.11E-64 | -42.16 |
| 11486296 | 11487296 | 522 | 537 | 3.37E-41 | 1.74E-39 | -42.18 |
| 14865419 | 14866419 | 107 | 110 | 6.62E-35 | 8.59E-27 | -42.29 |
| 8418003  | 8419003  | 9   | 9   | 2.10E-35 | 9.73E-28 | -42.34 |
| 22160171 | 22161171 | 822 | 847 | 3.16E-30 | 2.37E-17 | -42.38 |
| 9078840  | 9079840  | 678 | 700 | 4.22E-32 | 4.25E-21 | -42.38 |
| 16032103 | 16033103 | 726 | 750 | 1.84E-40 | 9.53E-38 | -42.45 |
| 23386466 | 23387466 | 781 | 806 | 1.75E-42 | 9.29E-42 | -42.48 |
| 24162268 | 24163268 | 702 | 724 | 3.33E-52 | 4.42E-61 | -42.60 |
| 18086999 | 18087999 | 384 | 397 | 9.21E-32 | 4.59E-20 | -42.73 |
| 15879668 | 15880668 | 490 | 505 | 1.79E-37 | 1.82E-31 | -42.75 |
| 27018513 | 27019513 | 309 | 317 | 3.52E-35 | 8.73E-27 | -42.85 |
| 16595006 | 16596006 | 566 | 584 | 3.25E-33 | 7.57E-23 | -42.86 |
| 23282572 | 23283572 | 348 | 358 | 8.44E-42 | 6.39E-40 | -42.95 |
| 26859265 | 26860265 | 388 | 402 | 1.13E-42 | 1.27E-41 | -43.00 |
| 13789005 | 13790005 | 889 | 917 | 5.77E-40 | 3.34E-36 | -43.00 |
| 24602542 | 24603542 | 746 | 771 | 5.92E-42 | 5.23E-40 | -43.17 |
| 26492229 | 26493229 | 650 | 671 | 8.88E-44 | 1.22E-43 | -43.19 |
| 7700962  | 7701962  | 42  | 42  | 2.75E-30 | 1.28E-16 | -43.23 |
| 16867516 | 16868516 | 662 | 684 | 1.19E-45 | 2.58E-47 | -43.26 |
| 14007865 | 14008865 | 475 | 490 | 8.04E-39 | 1.22E-33 | -43.28 |
| 11285319 | 11286319 | 35  | 35  | 4.75E-38 | 5.09E-32 | -43.35 |
| 6888541  | 6889541  | 797 | 822 | 2.22E-33 | 1.56E-22 | -43.50 |
| 21264295 | 21265295 | 458 | 473 | 3.59E-47 | 6.12E-50 | -43.68 |
| 12575484 | 12576484 | 481 | 496 | 3.60E-34 | 6.65E-24 | -43.71 |
| 16639289 | 16640289 | 179 | 182 | 2.04E-42 | 5.23E-40 | -44.10 |
| 26347458 | 26348458 | 914 | 943 | 8.76E-45 | 1.13E-44 | -44.17 |
| 23372841 | 23373841 | 164 | 167 | 5.74E-42 | 6.23E-39 | -44.28 |
| 11869513 | 11870513 | 909 | 938 | 1.96E-36 | 7.56E-28 | -44.29 |
| 13261017 | 13262017 | 448 | 462 | 7.71E-43 | 1.22E-40 | -44.31 |
| 19178742 | 19179742 | 534 | 549 | 1.62E-42 | 6.28E-40 | -44.38 |
| 17646725 | 17647725 | 782 | 807 | 2.26E-62 | 1.25E-79 | -44.39 |
| 25644893 | 25645893 | 830 | 855 | 3.76E-42 | 3.85E-39 | -44.43 |
| 5709084  | 5710084  | 65  | 66  | 7.27E-40 | 1.83E-34 | -44.54 |
| 8646231  | 8647231  | 390 | 404 | 5.47E-37 | 2.40E-28 | -44.90 |
| 20709056 | 20710056 | 881 | 909 | 4.48E-38 | 1.77E-30 | -44.95 |
| 23394131 | 23395131 | 313 | 321 | 5.35E-38 | 2.89E-30 | -45.00 |
| 26154146 | 26155146 | 277 | 283 | 2.53E-43 | 8.19E-41 | -45.11 |
| 25766671 | 25767671 | 689 | 711 | 3.86E-50 | 2.11E-54 | -45.15 |
| 25429440 | 25430440 | 901 | 930 | 3.66E-49 | 1.91E-52 | -45.15 |
| 15969085 | 15970085 | 233 | 237 | 3.33E-53 | 1.70E-60 | -45.18 |
| 7654124  | 7655124  | 685 | 707 | 4.06E-40 | 2.53E-34 | -45.19 |
| 10845897 | 10846897 | 584 | 602 | 1.56E-43 | 5.61E-41 | -45.36 |
| 21122930 | 21123930 | 40  | 40  | 7.26E-51 | 1.58E-55 | -45.48 |

|          |          |     |      |          |          |        |
|----------|----------|-----|------|----------|----------|--------|
| 23843772 | 23844772 | 900 | 929  | 1.02E-45 | 3.38E-45 | -45.52 |
| 23326855 | 23327855 | 627 | 648  | 2.95E-36 | 4.21E-26 | -45.68 |
| 22953857 | 22954857 | 749 | 774  | 3.50E-41 | 7.43E-36 | -45.78 |
| 17018248 | 17019248 | 596 | 615  | 1.48E-42 | 1.41E-38 | -45.81 |
| 18160236 | 18161236 | 882 | 910  | 5.23E-47 | 2.04E-47 | -45.87 |
| 26390889 | 26391889 | 328 | 337  | 5.26E-37 | 2.15E-27 | -45.89 |
| 5205792  | 5206792  | 616 | 637  | 5.24E-36 | 2.41E-25 | -45.94 |
| 15831127 | 15832127 | 460 | 475  | 1.71E-39 | 2.69E-32 | -45.96 |
| 15200096 | 15201096 | 488 | 503  | 4.55E-50 | 2.14E-53 | -46.01 |
| 7129542  | 7130542  | 37  | 37   | 1.73E-31 | 3.25E-16 | -46.04 |
| 25552069 | 25553069 | 711 | 733  | 7.62E-38 | 6.64E-29 | -46.06 |
| 14033412 | 14034412 | 72  | 74   | 1.80E-43 | 4.00E-40 | -46.09 |
| 17802566 | 17803566 | 259 | 264  | 8.38E-44 | 1.08E-40 | -46.19 |
| 13375130 | 13376130 | 664 | 686  | 3.28E-42 | 2.30E-37 | -46.33 |
| 26241860 | 26242860 | 207 | 211  | 2.81E-40 | 1.74E-33 | -46.34 |
| 23719439 | 23720439 | 925 | 954  | 8.20E-36 | 1.74E-24 | -46.41 |
| 16495370 | 16496370 | 649 | 670  | 8.73E-40 | 2.16E-32 | -46.45 |
| 24723468 | 24724468 | 619 | 640  | 3.18E-40 | 3.63E-33 | -46.55 |
| 13980614 | 13981614 | 332 | 342  | 1.03E-47 | 4.27E-48 | -46.60 |
| 9782257  | 9783257  | 447 | 461  | 6.86E-49 | 2.21E-50 | -46.67 |
| 26459868 | 26460868 | 732 | 756  | 6.45E-41 | 3.60E-34 | -46.94 |
| 23424788 | 23425788 | 499 | 514  | 6.71E-42 | 5.78E-36 | -47.11 |
| 21420988 | 21421988 | 544 | 560  | 1.13E-42 | 1.79E-37 | -47.15 |
| 21316242 | 21317242 | 26  | 26   | 2.43E-46 | 1.68E-44 | -47.45 |
| 7133800  | 7134800  | 177 | 180  | 6.89E-37 | 1.43E-25 | -47.48 |
| 27188832 | 27189832 | 531 | 546  | 5.08E-41 | 8.05E-34 | -47.49 |
| 14007013 | 14008013 | 355 | 366  | 1.98E-43 | 1.41E-38 | -47.55 |
| 14380011 | 14381011 | 299 | 307  | 1.76E-46 | 1.89E-44 | -47.78 |
| 14380011 | 14381011 | 680 | 702  | 1.76E-46 | 1.89E-44 | -47.78 |
| 6573451  | 6574451  | 491 | 506  | 6.10E-42 | 5.02E-35 | -48.13 |
| 22166984 | 22167984 | 981 | 1011 | 1.07E-36 | 1.55E-24 | -48.13 |
| 12319154 | 12320154 | 452 | 466  | 3.20E-49 | 1.67E-49 | -48.21 |
| 23246805 | 23247805 | 988 | 1018 | 2.50E-42 | 1.32E-35 | -48.33 |
| 15215424 | 15216424 | 592 | 610  | 3.25E-44 | 2.38E-39 | -48.35 |
| 16894767 | 16895767 | 864 | 892  | 1.21E-43 | 4.31E-38 | -48.47 |
| 9619602  | 9620602  | 97  | 100  | 2.37E-41 | 1.72E-33 | -48.49 |
| 23475884 | 23476884 | 212 | 216  | 1.38E-47 | 8.32E-46 | -48.64 |
| 22729036 | 22730036 | 747 | 772  | 9.61E-41 | 4.17E-32 | -48.65 |
| 2352101  | 2353101  | 162 | 165  | 7.83E-32 | 2.85E-14 | -48.67 |
| 24613613 | 24614613 | 203 | 206  | 1.53E-44 | 1.92E-39 | -48.91 |
| 27208419 | 27209419 | 874 | 902  | 2.48E-39 | 6.54E-29 | -49.03 |
| 5041434  | 5042434  | 547 | 564  | 1.23E-38 | 3.00E-27 | -49.30 |
| 10552949 | 10553949 | 700 | 722  | 1.47E-49 | 5.90E-49 | -49.43 |
| 25549514 | 25550514 | 213 | 217  | 6.07E-43 | 1.10E-35 | -49.48 |
| 25549514 | 25550514 | 839 | 865  | 6.07E-43 | 1.10E-35 | -49.48 |

|          |          |     |      |          |          |        |
|----------|----------|-----|------|----------|----------|--------|
| 26382373 | 26383373 | 588 | 606  | 1.68E-42 | 8.94E-35 | -49.50 |
| 8090140  | 8091140  | 767 | 792  | 2.09E-39 | 1.44E-28 | -49.52 |
| 17794902 | 17795902 | 256 | 261  | 1.50E-53 | 8.05E-57 | -49.56 |
| 20400779 | 20401779 | 659 | 680  | 6.34E-47 | 2.18E-43 | -49.73 |
| 25833947 | 25834947 | 308 | 316  | 7.63E-55 | 3.91E-59 | -49.83 |
| 16300355 | 16301355 | 789 | 814  | 6.70E-38 | 3.91E-25 | -49.94 |
| 25813508 | 25814508 | 3   | 3    | 7.90E-45 | 7.28E-39 | -50.07 |
| 26423249 | 26424249 | 976 | 1006 | 4.06E-40 | 1.99E-29 | -50.08 |
| 18899419 | 18900419 | 867 | 895  | 1.21E-38 | 2.22E-26 | -50.18 |
| 27097712 | 27098712 | 297 | 305  | 8.26E-44 | 1.16E-36 | -50.23 |
| 14278671 | 14279671 | 738 | 763  | 8.83E-40 | 1.60E-28 | -50.31 |
| 11515250 | 11516250 | 132 | 135  | 2.40E-43 | 1.58E-35 | -50.44 |
| 9600015  | 9601015  | 654 | 675  | 8.35E-51 | 1.98E-50 | -50.45 |
| 22430126 | 22431126 | 474 | 489  | 1.45E-32 | 7.32E-14 | -50.54 |
| 23180381 | 23181381 | 367 | 379  | 9.98E-41 | 7.60E-30 | -50.88 |
| 19767193 | 19768193 | 875 | 903  | 8.58E-52 | 7.90E-52 | -51.03 |
| 16488557 | 16489557 | 138 | 141  | 4.06E-45 | 2.07E-38 | -51.10 |
| 16980778 | 16981778 | 280 | 287  | 1.01E-51 | 2.17E-51 | -51.33 |
| 8890638  | 8891638  | 538 | 553  | 1.21E-43 | 3.14E-35 | -51.33 |
| 8102062  | 8103062  | 819 | 844  | 1.97E-45 | 1.20E-38 | -51.49 |
| 21183393 | 21184393 | 587 | 605  | 1.51E-48 | 8.58E-45 | -51.58 |
| 14718945 | 14719945 | 435 | 449  | 6.29E-46 | 3.93E-39 | -52.00 |
| 22088637 | 22089637 | 713 | 735  | 2.46E-48 | 6.58E-44 | -52.04 |
| 19076550 | 19077550 | 729 | 753  | 6.01E-46 | 4.19E-39 | -52.06 |
| 24251685 | 24252685 | 353 | 364  | 3.96E-43 | 2.25E-33 | -52.16 |
| 5693755  | 5694755  | 502 | 517  | 4.52E-43 | 3.74E-33 | -52.26 |
| 22031581 | 22032581 | 857 | 884  | 3.76E-50 | 3.88E-47 | -52.44 |
| 9392227  | 9393227  | 139 | 142  | 2.51E-45 | 3.05E-37 | -52.68 |
| 17742955 | 17743955 | 978 | 1008 | 1.43E-51 | 1.33E-49 | -52.81 |
| 26691501 | 26692501 | 845 | 871  | 9.76E-45 | 7.64E-36 | -52.90 |
| 20520002 | 20521002 | 476 | 491  | 2.24E-50 | 6.19E-47 | -53.09 |
| 15445355 | 15446355 | 469 | 484  | 1.44E-52 | 5.26E-51 | -53.40 |
| 23800341 | 23801341 | 791 | 816  | 2.51E-39 | 2.80E-24 | -53.65 |
| 22009439 | 22010439 | 763 | 788  | 4.83E-47 | 1.07E-39 | -53.66 |
| 24443294 | 24444294 | 385 | 399  | 7.28E-49 | 5.05E-43 | -53.98 |
| 20864897 | 20865897 | 121 | 124  | 1.36E-48 | 3.64E-42 | -54.30 |
| 21256630 | 21257630 | 831 | 856  | 4.74E-44 | 5.04E-33 | -54.35 |
| 11442013 | 11443013 | 796 | 821  | 1.62E-45 | 8.41E-36 | -54.51 |
| 26628484 | 26629484 | 363 | 374  | 7.95E-43 | 2.28E-30 | -54.56 |
| 23222109 | 23223109 | 479 | 494  | 1.17E-48 | 5.31E-42 | -54.59 |
| 13874164 | 13875164 | 315 | 323  | 1.94E-50 | 1.69E-45 | -54.65 |
| 13564184 | 13565184 | 335 | 345  | 5.07E-46 | 1.51E-36 | -54.77 |
| 21402253 | 21403253 | 567 | 585  | 3.41E-45 | 7.27E-35 | -54.80 |
| 13116246 | 13117246 | 223 | 227  | 3.75E-48 | 5.40E-40 | -55.59 |
| 25297443 | 25298443 | 200 | 203  | 1.57E-46 | 1.23E-36 | -55.70 |

|          |          |     |      |          |          |        |
|----------|----------|-----|------|----------|----------|--------|
| 27130924 | 27131924 | 735 | 760  | 1.41E-43 | 1.31E-30 | -55.82 |
| 13430484 | 13431484 | 706 | 728  | 1.11E-45 | 1.32E-34 | -56.03 |
| 10579348 | 10580348 | 464 | 479  | 1.34E-56 | 3.18E-56 | -56.25 |
| 12681933 | 12682933 | 674 | 696  | 5.55E-49 | 1.31E-40 | -56.63 |
| 23514205 | 23515205 | 884 | 912  | 3.69E-45 | 8.10E-33 | -56.77 |
| 22448010 | 22449010 | 472 | 487  | 3.86E-46 | 9.30E-35 | -56.79 |
| 13975504 | 13976504 | 96  | 99   | 4.55E-50 | 1.54E-42 | -56.87 |
| 8357540  | 8358540  | 83  | 85   | 1.28E-48 | 2.89E-39 | -57.25 |
| 10935314 | 10936314 | 103 | 106  | 6.92E-49 | 1.22E-39 | -57.41 |
| 13307003 | 13308003 | 768 | 793  | 2.18E-56 | 1.60E-54 | -57.53 |
| 21388627 | 21389627 | 815 | 840  | 1.58E-53 | 1.32E-48 | -57.72 |
| 25137343 | 25138343 | 859 | 886  | 5.07E-48 | 1.48E-37 | -57.76 |
| 9778850  | 9779850  | 512 | 527  | 3.16E-51 | 5.96E-44 | -57.78 |
| 21724155 | 21725155 | 692 | 714  | 2.79E-46 | 1.19E-33 | -58.19 |
| 9605125  | 9606125  | 518 | 533  | 2.65E-49 | 2.86E-39 | -58.61 |
| 11417316 | 11418316 | 69  | 71   | 3.29E-49 | 5.90E-39 | -58.74 |
| 26134559 | 26135559 | 806 | 831  | 7.12E-56 | 4.03E-52 | -58.90 |
| 10833975 | 10834975 | 808 | 833  | 9.08E-51 | 6.91E-42 | -58.92 |
| 13869906 | 13870906 | 194 | 197  | 1.57E-54 | 4.67E-49 | -59.28 |
| 15641221 | 15642221 | 196 | 199  | 2.67E-44 | 1.36E-28 | -59.28 |
| 23179529 | 23180529 | 168 | 171  | 1.24E-49 | 1.07E-38 | -59.84 |
| 13867352 | 13868352 | 684 | 706  | 1.24E-55 | 1.11E-50 | -59.86 |
| 25456691 | 25457691 | 440 | 454  | 3.60E-53 | 1.13E-45 | -59.94 |
| 23377950 | 23378950 | 641 | 662  | 1.16E-53 | 1.95E-46 | -60.16 |
| 14730016 | 14731016 | 344 | 354  | 5.08E-59 | 4.91E-57 | -60.28 |
| 14730016 | 14731016 | 598 | 617  | 5.08E-59 | 4.91E-57 | -60.28 |
| 19085066 | 19086066 | 278 | 285  | 1.91E-52 | 1.26E-43 | -60.54 |
| 25725794 | 25726794 | 514 | 529  | 7.45E-56 | 3.64E-50 | -60.82 |
| 22690714 | 22691714 | 938 | 968  | 2.37E-53 | 9.36E-45 | -61.22 |
| 19211102 | 19212102 | 368 | 380  | 1.76E-61 | 7.56E-61 | -61.39 |
| 24204848 | 24205848 | 816 | 841  | 4.54E-56 | 5.85E-50 | -61.45 |
| 25718130 | 25719130 | 927 | 956  | 3.39E-51 | 6.39E-40 | -61.75 |
| 23971511 | 23972511 | 149 | 152  | 7.04E-61 | 7.86E-59 | -62.20 |
| 25477980 | 25478980 | 33  | 33   | 1.13E-52 | 2.17E-42 | -62.23 |
| 26468384 | 26469384 | 575 | 593  | 9.37E-58 | 1.75E-52 | -62.30 |
| 17563268 | 17564268 | 591 | 609  | 4.99E-66 | 5.24E-69 | -62.32 |
| 9496973  | 9497973  | 826 | 851  | 5.58E-57 | 9.27E-51 | -62.47 |
| 23627467 | 23628467 | 953 | 983  | 1.51E-55 | 1.41E-47 | -62.79 |
| 21628777 | 21629777 | 950 | 980  | 2.20E-62 | 3.76E-61 | -62.89 |
| 10418397 | 10419397 | 991 | 1021 | 6.30E-54 | 3.74E-44 | -62.98 |
| 15454722 | 15455722 | 993 | 1023 | 5.04E-56 | 6.90E-48 | -63.43 |
| 13691923 | 13692923 | 158 | 161  | 1.64E-60 | 8.81E-57 | -63.52 |
| 22452268 | 22453268 | 66  | 67   | 3.85E-49 | 7.92E-34 | -63.73 |
| 13306151 | 13307151 | 325 | 334  | 1.29E-50 | 1.27E-36 | -63.88 |
| 10080314 | 10081314 | 850 | 876  | 6.25E-57 | 1.80E-48 | -64.66 |

|          |          |     |      |          |          |        |
|----------|----------|-----|------|----------|----------|--------|
| 24083070 | 24084070 | 824 | 849  | 1.80E-54 | 2.56E-43 | -64.90 |
| 10545285 | 10546285 | 480 | 495  | 3.60E-58 | 1.06E-50 | -64.91 |
| 23436710 | 23437710 | 295 | 303  | 1.70E-58 | 2.50E-51 | -64.94 |
| 19231540 | 19232540 | 1   | 1    | 3.89E-64 | 1.58E-62 | -65.02 |
| 8396714  | 8397714  | 428 | 442  | 6.38E-56 | 5.01E-46 | -65.09 |
| 13343621 | 13344621 | 921 | 950  | 6.13E-49 | 7.76E-32 | -65.32 |
| 26658289 | 26659289 | 572 | 590  | 1.16E-50 | 2.93E-35 | -65.34 |
| 14915663 | 14916663 | 813 | 838  | 1.74E-50 | 7.98E-35 | -65.42 |
| 9964498  | 9965498  | 347 | 357  | 2.26E-53 | 1.67E-40 | -65.52 |
| 25789664 | 25790664 | 477 | 492  | 1.58E-59 | 2.34E-52 | -65.97 |
| 16704010 | 16705010 | 157 | 160  | 1.96E-58 | 6.87E-50 | -66.25 |
| 8154009  | 8155009  | 890 | 918  | 3.95E-56 | 4.23E-45 | -66.43 |
| 26815834 | 26816834 | 47  | 47   | 9.28E-58 | 1.57E-47 | -67.26 |
| 13889493 | 13890493 | 175 | 178  | 2.93E-63 | 1.77E-58 | -67.31 |
| 13889493 | 13890493 | 283 | 290  | 2.93E-63 | 1.77E-58 | -67.31 |
| 10395404 | 10396404 | 585 | 603  | 1.25E-56 | 1.69E-44 | -68.04 |
| 16018477 | 16019477 | 429 | 443  | 1.68E-66 | 2.10E-63 | -68.87 |
| 24760938 | 24761938 | 495 | 510  | 2.74E-61 | 9.59E-53 | -69.11 |
| 9902331  | 9903331  | 30  | 30   | 9.35E-59 | 3.13E-47 | -69.55 |
| 10973636 | 10974636 | 201 | 204  | 2.19E-63 | 2.46E-56 | -69.71 |
| 15447910 | 15448910 | 126 | 129  | 1.70E-69 | 3.92E-68 | -70.13 |
| 12251027 | 12252027 | 238 | 242  | 7.01E-57 | 5.29E-42 | -71.03 |
| 22769061 | 22770061 | 117 | 120  | 1.19E-57 | 1.68E-43 | -71.07 |
| 16868368 | 16869368 | 500 | 515  | 5.06E-70 | 7.75E-68 | -71.48 |
| 15611416 | 15612416 | 563 | 581  | 5.78E-60 | 2.14E-47 | -71.81 |
| 23952776 | 23953776 | 552 | 569  | 4.99E-64 | 6.98E-55 | -72.45 |
| 14286336 | 14287336 | 897 | 926  | 3.83E-72 | 6.95E-71 | -72.68 |
| 9753302  | 9754302  | 891 | 919  | 2.60E-60 | 1.57E-46 | -73.37 |
| 24800963 | 24801963 | 470 | 485  | 7.26E-62 | 2.02E-49 | -73.58 |
| 25841611 | 25842611 | 780 | 805  | 8.03E-71 | 4.55E-67 | -73.85 |
| 22901909 | 22902909 | 345 | 355  | 7.35E-62 | 2.28E-48 | -74.62 |
| 26731526 | 26732526 | 872 | 900  | 2.18E-65 | 4.02E-55 | -74.93 |
| 25992343 | 25993343 | 386 | 400  | 1.06E-67 | 1.16E-59 | -75.01 |
| 25948912 | 25949912 | 84  | 86   | 5.92E-72 | 2.14E-67 | -75.79 |
| 26387482 | 26388482 | 642 | 663  | 3.72E-68 | 1.98E-58 | -77.15 |
| 11424129 | 11425129 | 638 | 659  | 5.45E-83 | 4.93E-83 | -82.22 |
| 9970459  | 9971459  | 271 | 276  | 5.25E-70 | 1.77E-54 | -84.81 |
| 14037670 | 14038670 | 507 | 522  | 3.86E-75 | 1.07E-63 | -85.86 |
| 14119423 | 14120423 | 471 | 486  | 2.84E-70 | 9.41E-54 | -86.07 |
| 23477587 | 23478587 | 987 | 1017 | 5.83E-73 | 2.52E-55 | -89.87 |
| 26332129 | 26333129 | 990 | 1020 | 5.48E-75 | 1.13E-58 | -90.58 |
| 14718094 | 14719094 | 195 | 198  | 2.25E-78 | 7.03E-64 | -92.14 |
| 26394295 | 26395295 | 71  | 73   | 5.00E-79 | 2.11E-62 | -94.93 |
| 26676173 | 26677173 | 601 | 621  | 1.04E-77 | 3.14E-59 | -95.46 |
| 14197770 | 14198770 | 957 | 987  | 8.21E-97 | 7.50E-97 | -96.05 |

|          |          |     |     |           |           |         |
|----------|----------|-----|-----|-----------|-----------|---------|
| 22742661 | 22743661 | 409 | 423 | 1.50E-84  | 2.70E-72  | -96.08  |
| 23656421 | 23657421 | 425 | 439 | 2.61E-82  | 4.71E-66  | -97.84  |
| 25158633 | 25159633 | 473 | 488 | 2.85E-90  | 6.59E-81  | -98.91  |
| 22445455 | 22446455 | 183 | 186 | 2.67E-69  | 1.12E-38  | -99.19  |
| 14988049 | 14989049 | 142 | 145 | 4.00E-95  | 1.96E-89  | -100.09 |
| 14618457 | 14619457 | 964 | 994 | 2.07E-97  | 1.11E-93  | -100.41 |
| 25512044 | 25513044 | 578 | 596 | 1.80E-96  | 5.92E-88  | -104.26 |
| 2646753  | 2647753  | 234 | 238 | 1.10E-100 | 2.72E-96  | -104.35 |
| 26338942 | 26339942 | 219 | 223 | 6.98E-84  | 4.21E-61  | -105.94 |
| 13442406 | 13443406 | 635 | 656 | 6.97E-103 | 7.63E-94  | -111.20 |
| 9898925  | 9899925  | 266 | 271 | 6.15E-98  | 3.68E-77  | -117.99 |
| 16130888 | 16131888 | 799 | 824 | 3.66E-175 | 9.74E-130 | -219.86 |
| 1578003  | 1579003  | 804 | 829 | NA        | 1.00E+00  | NA      |
| 11642989 | 11643989 | 786 | 811 | NA        | NA        | NA      |
| 192460   | 193460   | 860 | 887 | NA        | NA        | NA      |
| 364482   | 365482   | 64  | 65  | NA        | NA        | NA      |

---



**Table S5.** Populations used to estimate the frequency of *FBti0019386*.

|                      | <b>Population</b>                | <b>Köppen-Geiger climate classification / Latitude</b>    | <b>Pool/ individual strain</b> | <b>Accession number</b>                 | <b>Reference</b>       |
|----------------------|----------------------------------|-----------------------------------------------------------|--------------------------------|-----------------------------------------|------------------------|
| <b>North America</b> | Bowdoinham, ME                   | Cold climate, no dry season and warm summer / 45.5        | 50-100 pooled individuals      | SRX661844-5                             | Bergland et al., 2014  |
|                      | Linville, PA                     | Cold climate, no dry season and hot summer / 40           | 50-100 pooled individuals      | SRX661837-43                            | Bergland et al., 2014  |
|                      | Winters, CA                      | Temperate climate, dry winter and hot summer / 38.6       | 35 individual strains          | SRP009033                               | Campo et al., 2013     |
|                      | Raleigh, NC                      | Temperate climate, no dry season and hot summer / 35.5    | 141 individuals                | SRX <sup>a</sup>                        | Huang et al., 2014     |
|                      | Eutawville, SC                   | Temperate climate, no dry season and hot summer / 33      | 50-100 pooled individuals      | SRX661835                               | Bergland et al., 2014  |
|                      | Hahira, GA                       | Temperate climate, no dry season and hot summer / 30.9    | 50-100 pooled individuals      | SRX661834                               | Bergland et al., 2014  |
|                      | Homestead, FL                    | Tropical climate, monsoon / 25.5                          | 50-100 pooled individuals      | SRX661832-3                             | Bergland et al., 2014  |
| <b>Australia</b>     | Cairns                           | Tropical climate, monsoon / -16.88                        | Pool                           | SRR1177951                              | Reinhardt et al., 2014 |
|                      | Innisfail                        | Tropical climate, monsoon / -17.52                        | -                              | -                                       | González et al., 2010  |
|                      | Cardwell                         | Tropical climate, savannah / - 18.25                      | Pool                           | SRR1177952                              | Reinhardt et al., 2014 |
|                      | Redland Bay                      | Temperate climate, no dry season and hot summer / -27.48  | -                              | -                                       | González et al., 2010  |
|                      | Coffs Harbour                    | Temperate climate, no dry season and hot summer / -30.32  | -                              | -                                       | González et al., 2010  |
|                      | Melbourne                        | Temperate climate, no dry season and warm summer / -37.82 | -                              | -                                       | González et al., 2010  |
|                      | Miller's Orchard, north Tasmania | Temperate climate, no dry season and warm summer / -41.53 | Pool                           | SRR1177953                              | Reinhardt et al., 2014 |
|                      | Sorell, south Tasmania           | Temperate climate, no dry season and warm summer / -42.83 | Pool                           | SRR1177955                              | Reinhardt et al., 2014 |
| <b>Europe</b>        | Stockholm, Sweden                | Cold climate, no dry season and warm summer / 59.33       | 27 individual strains          | -                                       | This work              |
|                      | Vienna, Austria                  | Cold climate, no dry season and warm summer / 48.25       | Pool                           | ERR173232, ERR173238                    | Kofler et al., 2012    |
|                      | Lyon, France                     | Temperate climate, no dry season and warm summer / 45.7   | 8 individual strains?          | SRX058182-SRX058190                     | Pool et al., 2012      |
|                      | Bolzano, Italy                   | Cold climate, no dry season and warm summer / 45.62       | Pool                           | ERR173233, ERR173239                    | Kofler et al., 2012    |
|                      | Povoa de Varzim, Portugal        | Temperate climate, dry and warm summer / 41.23            | Pool                           | SRR188217, SRR189066                    | Bastide et al., 2013   |
|                      | Bari, Italy                      | Temperate climate, no dry season and hot summer / 41.13   | 16 individual strains          | -                                       | This work              |
| <b>Africa</b>        | Rwanda                           | Temperate climate, dry winter and warm summer / 2         | 22 individual strains          | SRX058338-39, 41-57, 59, 62, 67, 69, 71 | Pool et al., 2012      |

<sup>a</sup>Accession numbers for DGRP strains can be found in Supplemental Data File S1 in Huang et al 2014.

**Table S6. (A)** Pearson product-moment correlations between the frequency of the TE and geographical and climatic variables for each one of the three continents analyzed. Significant correlations are in bold and highlighted in gray. Data for each one of the geographic and climatic variables is detailed in **(B)**.

**(A)**

| %TE vs       | USA          |                | AUST         |                | EUR   |         |
|--------------|--------------|----------------|--------------|----------------|-------|---------|
|              | r            | p              | r            | p              | r     | p       |
| Latitude     | <b>0.87</b>  | <b>p=0.011</b> | <b>0.91</b>  | <b>p=0.002</b> | -0.50 | p=0.313 |
| Longitude    | 0.65         | p=0.117        | 0.12         | p=0.776        | -0.68 | p=0.139 |
| Elevation    | -0.27        | p=0.556        | <b>0.74</b>  | <b>p=0.036</b> | 0.18  | p=0.735 |
| AvMonTemp    | <b>-0.75</b> | <b>p=0.050</b> | <b>-0.93</b> | <b>p=0.001</b> | 0.37  | p=0.470 |
| ThermalAmp   | 0.2          | p=0.664        | 0.55         | p=0.160        | -0.48 | p=0.337 |
| HotMonth     | <b>-0.88</b> | <b>p=0.009</b> | <b>-0.95</b> | <b>p=0.000</b> | 0.01  | p=0.984 |
| ColdMonth    | -0.59        | p=0.163        | <b>-0.91</b> | <b>p=0.002</b> | 0.38  | p=0.458 |
| SummerSEASON | <b>-0.87</b> | <b>p=0.012</b> | <b>-0.95</b> | <b>p=0.000</b> | 0.29  | p=0.573 |
| WinterSEASON | -0.62        | p=0.134        | <b>-0.92</b> | <b>p=0.001</b> | 0.40  | p=0.434 |
| Monthabove10 | -0.56        | p=0.185        | <b>-0.94</b> | <b>p=0.000</b> | 0.25  | p=0.637 |
| MAP          | 0.31         | p=0.491        | <b>0.84</b>  | <b>p=0.009</b> | -0.66 | p=0.156 |
| Cv           | 0.16         | p=0.734        | -0.7         | p=0.056        | 0.40  | p=0.438 |
| DryMonth     | -0.48        | p=0.278        | -0.31        | p=0.453        | -0.12 | p=0.817 |
| Summer_P     | -0.54        | p=0.209        | <b>-0.88</b> | <b>p=0.004</b> | 0.15  | p=0.773 |
| Summer_DryM  | -0.64        | p=0.119        | -0.58        | p=0.135        | -0.26 | p=0.620 |
| Summer_wetM  | -0.63        | p=0.127        | <b>-0.85</b> | <b>p=0.007</b> | 0.48  | p=0.334 |
| Winter_P     | -0.54        | p=0.209        | -0.57        | p=0.139        | 0.15  | p=0.773 |
| Winter_DryM  | -0.64        | p=0.119        | -0.11        | p=0.793        | -0.26 | p=0.620 |
| Winter_wetM  | -0.63        | p=0.127        | <b>-0.74</b> | <b>p=0.034</b> | 0.48  | p=0.334 |

**(B) Climate data** (from Peel et al., 2007)

**LEGENDS:**

|                          |                                                                                         |
|--------------------------|-----------------------------------------------------------------------------------------|
| <b>Latitude</b>          | Latitude (decimal degrees)                                                              |
| <b>Longitude</b>         | Longitude (decimal degrees)                                                             |
| <b>Elevation</b>         | Elevation (m)                                                                           |
| <b>Temperature</b>       |                                                                                         |
| <b>Ave. Mon. Temp.</b>   | The average annual temperature (Deg. C) (the average of the monthly averages)           |
| <b>Thermal Amplitude</b> | HotMonth - ColdMonth                                                                    |
| <b>HotMonth</b>          | The hottest monthly average (Deg. C)                                                    |
| <b>ColdMonth</b>         | The coldest monthly average (Deg. C)                                                    |
| <b>SeasonA</b>           | Average of the monthly average temperatures (Deg. C) for Oct, Nov, Dec, Jan, Feb & Mar  |
| <b>SeasonB</b>           | Average of the monthly average temperatures (Deg. C) for Apr, May, Jun, Jul, Aug & Sep  |
| <b>MonthsAbove10</b>     | The number of monthly average temperatures greater than or equal to 10 Deg. C           |
| <b>Precipitation</b>     |                                                                                         |
| <b>MAP</b>               | Mean annual precipitation for complete calendar years (mm)                              |
| <b>Cv</b>                | Coefficient of variation of annual precipitation for complete calendar years            |
| <b>DryMonth</b>          | Monthly average precipitation (mm) for the driest month                                 |
| <b>ONDJFM_P*</b>         | Summation of the monthly average precipitation (mm) for Oct, Nov, Dec, Jan, Feb & Mar   |
| <b>ONDJFM_DryM*</b>      | Driest monthly average precipitation (mm) for the period Oct, Nov, Dec, Jan, Feb & Mar  |
| <b>ONDJFM_WetM*</b>      | Wettest monthly average precipitation (mm) for the period Oct, Nov, Dec, Jan, Feb & Mar |
| <b>AMJJAS_P*</b>         | Summation of the monthly average precipitation (mm) for Apr, May, Jun, Jul, Aug & Sep   |
| <b>AMJJAS_DryM*</b>      | Driest monthly average precipitation (mm) for Apr, May, Jun, Jul, Aug & Sep             |
| <b>AMJJAS_WetM*</b>      | Wettest monthly average precipitation (mm) for Apr, May, Jun, Jul, Aug & Sep            |

\*Oct, Nov, Dec, Jan, Feb & Mar were considered summer for AUST and winter for USA and EUR

\*Apr, May, Jun, Jul, Aug & Sep were considered summer for USA and EUR and winter for AUST

| Cont | pop             | FBti0019386 frequency | Latitude | Longitude | Elevation | AvMon Temp | Thermal Amplitude | Hot Month | Cold Month | SeasonA | SeasonB | Months Above10 | MAP     | Cv    | Dry Month | ONDJFM_P | ONDJFM_DryM | ONDJFM_WetM | AMJJAS_P | AMJJAS_DryM | AMJJAS_WetM |
|------|-----------------|-----------------------|----------|-----------|-----------|------------|-------------------|-----------|------------|---------|---------|----------------|---------|-------|-----------|----------|-------------|-------------|----------|-------------|-------------|
| USA  | FL              | 46.88                 | 25.5     | -80.28    | 4         | 24.29      | 8.37              | 28.16     | 19.79      | 21.86   | 26.71   | 12             | 1475.09 | 0.244 | 50.06     | 499.15   | 50.06       | 206.81      | 987.58   | 81.84       | 225.32      |
| USA  | GA              | 43.06                 | 30.9     | -83.65    | 110       | 18.11      | 18.88             | 27.39     | 8.51       | 12.05   | 24.18   | 9              | 1140.95 | 0.166 | 57.46     | 572.03   | 57.46       | 127.13      | 575.78   | 78.10       | 125.10      |
| USA  | SC              | 61.67                 | 33       | -89.83    | 47        | 19.18      | 18.39             | 27.87     | 9.48       | 13.41   | 24.96   | 11             | 1133.07 | 0.182 | 70.56     | 544.61   | 70.56       | 110.60      | 587.73   | 83.22       | 118.23      |
| USA  | NC              | 59.40                 | 35.5     | -78.78    | 134       | 15.52      | 20.74             | 25.82     | 5.08       | 9.01    | 22.03   | 9              | 1149.69 | 0.157 | 68.48     | 503.57   | 68.48       | 99.16       | 646.30   | 83.32       | 132.44      |
| USA  | CA              | 66.30                 | 38.6     | -121.5    | 6         | 15.87      | 15.84             | 23.59     | 7.75       | 11.30   | 20.43   | 10             | 445.64  | 0.344 | 0.56      | 382.14   | 20.67       | 89.97       | 61.26    | 0.56        | 34.90       |
| USA  | PA              | 64.34                 | 40       | -75.2     | 9         | 12.49      | 24.77             | 24.88     | 0.11       | 5.06    | 19.93   | 7              | 1066.56 | 0.153 | 74.67     | 491.57   | 74.67       | 92.01       | 573.87   | 85.50       | 107.42      |
| USA  | ME              | 81.25                 | 45.5     | -122.6    | 12        | 11.85      | 15.69             | 19.79     | 4.10       | 7.30    | 16.41   | 7              | 1042.93 | 0.207 | 13.98     | 799.70   | 83.64       | 172.05      | 242.62   | 13.98       | 70.23       |
| AUST | Cairns          | 15.38                 | -16.88   | 145.75    | 7         | 25.00      | 6.58              | 27.83     | 21.25      | 27.02   | 22.98   | 12             | 1990.58 | 0.288 | 25.78     | 1578.78  | 38.35       | 449.41      | 426.85   | 25.78       | 199.91      |
| AUST | Innisfail       | 13                    | -17.52   | 146.02    | 4         | 22.97      | 7.78              | 26.46     | 18.68      | 25.29   | 20.64   | 12             | 3565.8  | 0.223 | 80.04     | 2262.50  | 80.04       | 673.34      | 1288.27  | 86.45       | 469.50      |
| AUST | Cardwell        | 22.22                 | -18.25   | 146.02    | 7         | 23.74      | 8.03              | 27.16     | 19.13      | 26.19   | 21.30   | 12             | 2131.84 | 0.284 | 29.47     | 1674.83  | 52.02       | 464.08      | 452.90   | 29.47       | 212.15      |
| AUST | Redland Bay     | 20                    | -27.48   | 153.03    | 38        | 20.24      | 9.78              | 24.62     | 14.84      | 23.24   | 17.25   | 12             | 1283.24 | 0.289 | 46.35     | 816.39   | 81.27       | 174.28      | 472.33   | 46.35       | 115.64      |
| AUST | Coffs Harbour   | 30                    | -30.32   | 153.12    | 5         | 18.49      | 10.02             | 23.02     | 13.01      | 21.45   | 15.54   | 12             | 1697.47 | 0.282 | 60.71     | 1004.30  | 89.43       | 241.34      | 667.50   | 60.71       | 180.75      |
| AUST | Melbourne       | 46                    | -37.82   | 144.97    | 113       | 15.49      | 10.37             | 20.52     | 10.15      | 18.54   | 12.44   | 12             | 656.86  | 0.192 | 47.11     | 333.97   | 47.11       | 67.80       | 324.01   | 48.71       | 59.21       |
| AUST | Millers Orchard | 100                   | -41.53   | 147.2     | 178       | 10.98      | 10.05             | 16.05     | 6.00       | 13.97   | 8.00    | 7              | 684.16  | 0.198 | 38.37     | 285.56   | 38.37       | 61.95       | 400.30   | 54.09       | 78.58       |
| AUST | Sorell          | 76.92                 | -42.83   | 147.48    | 27        | 12.64      | 9.35              | 17.17     | 7.83       | 15.36   | 9.91    | 9              | 504.63  | 0.212 | 31.44     | 261.48   | 35.30       | 54.28       | 246.40   | 31.44       | 47.09       |
| EUR  | IT_bari         | 56.25                 | 41.13    | 16.78     | 49        | 15.90      | 15.51             | 24.01     | 8.50       | 11.43   | 20.37   | 10             | 579.56  | 0.252 | 24.20     | 356.21   | 50.06       | 68.73       | 214.98   | 24.20       | 57.09       |
| EUR  | PORT            | 75.17                 | 41.23    | -8.68     | 77        | 14.23      | 11.18             | 19.93     | 8.75       | 10.93   | 17.53   | 9              | 1280.28 | 0.276 | 20.88     | 901.97   | 128.92      | 167.61      | 365.02   | 20.88       | 112.27      |
| EUR  | IT_bolzano      | 55.95                 | 45.62    | 8.73      | 211       | 10.97      | 21.17             | 21.44     | 0.27       | 4.61    | 17.32   | 7              | 721.02  | 0.206 | 25.07     | 251.88   | 25.07       | 65.50       | 464.85   | 50.65       | 96.64       |
| EUR  | FR              | 52.5                  | 45.7     | 4.7       | 201       | 11.08      | 17.75             | 20.28     | 2.53       | 5.74    | 16.42   | 7              | 735.43  | 0.198 | 37.35     | 314.96   | 37.35       | 83.25       | 424.73   | 56.47       | 77.54       |
| EUR  | AUST            | 71.89                 | 48.25    | 16.37     | 209       | 9.47       | 21.06             | 19.61     | -1.45      | 2.95    | 15.98   | 5              | 643.03  | 0.17  | 37.41     | 263.93   | 37.41       | 48.90       | 379.35   | 48.84       | 75.01       |
| EUR  | SW              | 48.15                 | 59.33    | 18.05     | 52        | 6.04       | 21.14             | 17.49     | -3.66      | -0.18   | 12.27   | 4              | 555.76  | 0.171 | 28.57     | 244.64   | 28.57       | 51.01       | 308.92   | 33.21       | 72.95       |

**Table S7.** Pearson’s product-moment correlation coefficients among the different geographical and climatic variables in the three continents. Significant correlations are in **bold**.

|                  | USA          |              |       |             |              |             |             |             |             |      |              |              |             |             |             |             |             |             |  |
|------------------|--------------|--------------|-------|-------------|--------------|-------------|-------------|-------------|-------------|------|--------------|--------------|-------------|-------------|-------------|-------------|-------------|-------------|--|
|                  | 1            | 2            | 3     | 4           | 5            | 6           | 7           | 8           | 9           | 10   | 11           | 12           | 13          | 14          | 15          | 16          | 17          | 18          |  |
| latitude (1)     |              |              |       |             |              |             |             |             |             |      |              |              |             |             |             |             |             |             |  |
| longitude (2)    | 0.56         |              |       |             |              |             |             |             |             |      |              |              |             |             |             |             |             |             |  |
| elevation(3)     | -0.14        | -0.31        |       |             |              |             |             |             |             |      |              |              |             |             |             |             |             |             |  |
| AvMonTemp(4)     | <b>-0.94</b> | -0.32        | -0.09 |             |              |             |             |             |             |      |              |              |             |             |             |             |             |             |  |
| thermalAmp(5)    | 0.39         | -0.31        | 0.48  | -0.69       |              |             |             |             |             |      |              |              |             |             |             |             |             |             |  |
| HotMonth(6)      | <b>-0.95</b> | -0.71        | 0.29  | <b>0.79</b> | -0.11        |             |             |             |             |      |              |              |             |             |             |             |             |             |  |
| ColdMonth(7)     | <b>-0.79</b> | -0.09        | -0.26 | <b>0.95</b> | <b>-0.88</b> | 0.57        |             |             |             |      |              |              |             |             |             |             |             |             |  |
| summerSEASON (8) | <b>-1.00</b> | -0.56        | 0.17  | <b>0.93</b> | -0.37        | <b>0.96</b> | <b>0.77</b> |             |             |      |              |              |             |             |             |             |             |             |  |
| winterSEASON(9)  | <b>-0.83</b> | -0.14        | -0.24 | <b>0.97</b> | <b>-0.84</b> | 0.63        | <b>1.00</b> | <b>0.81</b> |             |      |              |              |             |             |             |             |             |             |  |
| monthabove10(10) | <b>-0.86</b> | -0.11        | -0.11 | <b>0.93</b> | -0.66        | 0.71        | <b>0.89</b> | <b>0.85</b> | <b>0.91</b> |      |              |              |             |             |             |             |             |             |  |
| MAP(11)          | 0.31         | 0.65         | -0.33 | -0.25       | -0.01        | -0.37       | -0.17       | -0.34       | -0.17       | 0.02 |              |              |             |             |             |             |             |             |  |
| Cv(12)           | 0.02         | 0.67         | -0.63 | 0.19        | -0.58        | -0.23       | 0.36        | -0.07       | 0.34        | 0.39 | <b>0.82</b>  |              |             |             |             |             |             |             |  |
| DryMonth(13)     | -0.47        | <b>-0.91</b> | 0.50  | 0.20        | 0.46         | 0.67        | -0.06       | 0.50        | 0.00        | 0.06 | -0.72        | <b>-0.82</b> |             |             |             |             |             |             |  |
| summer_P(14)     | -0.55        | <b>-0.84</b> | 0.33  | 0.43        | 0.03         | 0.62        | 0.28        | 0.57        | 0.30        | 0.17 | <b>-0.94</b> | <b>-0.76</b> | <b>0.85</b> |             |             |             |             |             |  |
| summer_DryM(15)  | -0.64        | <b>-0.95</b> | 0.43  | 0.41        | 0.26         | <b>0.78</b> | 0.17        | 0.66        | 0.22        | 0.22 | <b>-0.76</b> | -0.74        | <b>0.97</b> | <b>0.92</b> |             |             |             |             |  |
| summer_wetM(16)  | -0.66        | <b>-0.80</b> | 0.23  | 0.59        | -0.18        | 0.68        | 0.47        | 0.67        | 0.49        | 0.34 | <b>-0.89</b> | -0.61        | 0.75        | <b>0.97</b> | <b>0.87</b> |             |             |             |  |
| winter_P(17)     | -0.55        | <b>-0.84</b> | 0.33  | 0.43        | 0.03         | 0.62        | 0.28        | 0.57        | 0.30        | 0.17 | <b>-0.94</b> | <b>-0.76</b> | <b>0.85</b> | <b>1.00</b> | <b>0.92</b> | <b>0.97</b> |             |             |  |
| winter_DryM(18)  | -0.64        | <b>-0.95</b> | 0.43  | 0.41        | 0.26         | <b>0.78</b> | 0.17        | 0.66        | 0.22        | 0.22 | <b>-0.76</b> | -0.74        | <b>0.97</b> | <b>0.92</b> | <b>1.00</b> | <b>0.87</b> | <b>0.92</b> |             |  |
| winter_wetM(19)  | -0.66        | <b>-0.80</b> | 0.23  | 0.59        | -0.18        | 0.68        | 0.47        | 0.67        | 0.49        | 0.34 | <b>-0.89</b> | -0.61        | 0.75        | <b>0.97</b> | <b>0.87</b> | <b>1.00</b> | <b>0.97</b> | <b>0.87</b> |  |

**AUST**

|                     | 1            | 2     | 3            | 4            | 5            | 6            | 7            | 8            | 9            | 10    | 11           | 12    | 13          | 14          | 15          | 16          | 17          | 18   |
|---------------------|--------------|-------|--------------|--------------|--------------|--------------|--------------|--------------|--------------|-------|--------------|-------|-------------|-------------|-------------|-------------|-------------|------|
| latitude (1)        |              |       |              |              |              |              |              |              |              |       |              |       |             |             |             |             |             |      |
| longitude (2)       | -0.03        |       |              |              |              |              |              |              |              |       |              |       |             |             |             |             |             |      |
| elevation(3)        | <b>0.77</b>  | 0.10  |              |              |              |              |              |              |              |       |              |       |             |             |             |             |             |      |
| AvMonTemp(4)        | <b>-0.99</b> | 0.06  | <b>-0.78</b> |              |              |              |              |              |              |       |              |       |             |             |             |             |             |      |
| thermalAmp(5)       | <b>0.75</b>  | -0.44 | 0.67         | <b>-0.78</b> |              |              |              |              |              |       |              |       |             |             |             |             |             |      |
| HotMonth(6)         | <b>-0.98</b> | 0.02  | <b>-0.76</b> | <b>1.00</b>  | <b>-0.73</b> |              |              |              |              |       |              |       |             |             |             |             |             |      |
| ColdMonth(7)        | <b>-0.98</b> | 0.12  | <b>-0.78</b> | <b>1.00</b>  | <b>-0.83</b> | <b>0.99</b>  |              |              |              |       |              |       |             |             |             |             |             |      |
| summerSEASON<br>(8) | <b>-0.99</b> | 0.03  | <b>-0.77</b> | <b>1.00</b>  | <b>-0.74</b> | <b>1.00</b>  | <b>0.99</b>  |              |              |       |              |       |             |             |             |             |             |      |
| winterSEASON(9)     | <b>-0.98</b> | 0.09  | <b>-0.78</b> | <b>1.00</b>  | <b>-0.81</b> | <b>0.99</b>  | <b>1.00</b>  | <b>1.00</b>  |              |       |              |       |             |             |             |             |             |      |
| monthabove10(10)    | <b>-0.75</b> | -0.11 | -0.61        | <b>0.80</b>  | -0.34        | <b>0.84</b>  | <b>0.76</b>  | <b>0.82</b>  | <b>0.78</b>  |       |              |       |             |             |             |             |             |      |
| MAP(11)             | <b>0.95</b>  | 0.14  | <b>0.77</b>  | <b>-0.89</b> | 0.60         | <b>-0.90</b> | <b>-0.88</b> | <b>-0.90</b> | <b>-0.88</b> | -0.68 |              |       |             |             |             |             |             |      |
| Cv(12)              | <b>-0.71</b> | -0.50 | -0.62        | <b>0.73</b>  | -0.42        | <b>0.74</b>  | 0.70         | <b>0.74</b>  | <b>0.72</b>  | 0.58  | -0.70        |       |             |             |             |             |             |      |
| DryMonth(13)        | -0.21        | -0.23 | -0.30        | 0.11         | 0.16         | 0.15         | 0.08         | 0.13         | 0.10         | 0.30  | -0.37        | -0.16 |             |             |             |             |             |      |
| summer_P(14)        | <b>-0.98</b> | -0.01 | <b>-0.86</b> | <b>0.95</b>  | <b>-0.73</b> | <b>0.94</b>  | <b>0.94</b>  | <b>0.95</b>  | <b>0.95</b>  | 0.70  | <b>-0.97</b> | 0.67  | 0.32        |             |             |             |             |      |
| summer_DryM(15)     | -0.43        | -0.69 | -0.46        | 0.36         | 0.16         | 0.41         | 0.30         | 0.39         | 0.33         | 0.55  | -0.60        | 0.42  | <b>0.77</b> | 0.51        |             |             |             |      |
| summer_wetM(16)     | <b>-0.97</b> | 0.04  | <b>-0.86</b> | <b>0.94</b>  | <b>-0.76</b> | <b>0.93</b>  | <b>0.94</b>  | <b>0.94</b>  | <b>0.94</b>  | 0.67  | <b>-0.96</b> | 0.65  | 0.31        | 1.00        | 0.46        |             |             |      |
| winter_P(17)        | -0.65        | -0.15 | -0.62        | 0.54         | -0.32        | 0.55         | 0.52         | 0.54         | 0.53         | 0.42  | <b>-0.79</b> | 0.22  | <b>0.83</b> | <b>0.75</b> | <b>0.74</b> | <b>0.75</b> |             |      |
| winter_DryM(18)     | -0.09        | -0.15 | -0.14        | -0.03        | 0.20         | 0.00         | -0.05        | -0.02        | -0.04        | 0.07  | -0.29        | -0.31 | 0.96        | 0.21        | 0.65        | 0.21        | <b>0.80</b> |      |
| winter_wetM(19)     | <b>-0.89</b> | 0.01  | <b>-0.81</b> | <b>0.82</b>  | -0.66        | <b>0.81</b>  | <b>0.82</b>  | <b>0.81</b>  | <b>0.82</b>  | 0.55  | <b>-0.95</b> | 0.49  | 0.51        | <b>0.95</b> | 0.56        | <b>0.96</b> | <b>0.89</b> | 0.45 |

**EUR**

|                  | 1            | 2           | 3           | 4           | 5            | 6           | 7           | 8           | 9           | 10          | 11           | 12    | 13    | 14          | 15          | 16          | 17   | 18   |  |
|------------------|--------------|-------------|-------------|-------------|--------------|-------------|-------------|-------------|-------------|-------------|--------------|-------|-------|-------------|-------------|-------------|------|------|--|
| latitude (1)     |              |             |             |             |              |             |             |             |             |             |              |       |       |             |             |             |      |      |  |
| longitude (2)    | 0.16         |             |             |             |              |             |             |             |             |             |              |       |       |             |             |             |      |      |  |
| elevation(3)     | -0.19        | 0.51        |             |             |              |             |             |             |             |             |              |       |       |             |             |             |      |      |  |
| AvMonTemp(4)     | <b>-0.92</b> | -0.29       | -0.19       |             |              |             |             |             |             |             |              |       |       |             |             |             |      |      |  |
| thermalAmp(5)    | 0.65         | 0.61        | 0.41        | -0.77       |              |             |             |             |             |             |              |       |       |             |             |             |      |      |  |
| HotMonth(6)      | -0.77        | 0.11        | -0.06       | <b>0.84</b> | -0.32        |             |             |             |             |             |              |       |       |             |             |             |      |      |  |
| ColdMonth(7)     | <b>-0.83</b> | -0.43       | -0.35       | <b>0.96</b> | <b>-0.92</b> | 0.67        |             |             |             |             |              |       |       |             |             |             |      |      |  |
| summerSEASON(8)  | <b>-0.93</b> | -0.10       | -0.02       | <b>0.95</b> | -0.54        | <b>0.95</b> | <b>0.82</b> |             |             |             |              |       |       |             |             |             |      |      |  |
| winterSEASON(9)  | <b>-0.88</b> | -0.39       | -0.28       | <b>0.98</b> | <b>-0.87</b> | 0.74        | <b>0.99</b> | <b>0.88</b> |             |             |              |       |       |             |             |             |      |      |  |
| monthabove10(10) | <b>-0.87</b> | -0.28       | -0.27       | <b>0.98</b> | -0.79        | <b>0.82</b> | <b>0.97</b> | <b>0.91</b> | <b>0.98</b> |             |              |       |       |             |             |             |      |      |  |
| MAP(11)          | 0.56         | 0.51        | -0.21       | -0.42       | 0.69         | 0.04        | -0.53       | -0.25       | -0.50       | -0.42       |              |       |       |             |             |             |      |      |  |
| Cv(12)           | <b>-0.75</b> | -0.59       | -0.41       | <b>0.89</b> | <b>-0.92</b> | 0.56        | <b>0.96</b> | 0.72        | <b>0.94</b> | <b>0.92</b> | -0.62        |       |       |             |             |             |      |      |  |
| DryMonth(13)     | 0.28         | 0.67        | 0.60        | -0.49       | 0.54         | -0.32       | -0.56       | -0.36       | -0.54       | -0.58       | 0.34         | -0.75 |       |             |             |             |      |      |  |
| summer_P(14)     | 0.02         | 0.26        | <b>0.84</b> | -0.36       | 0.29         | -0.40       | -0.40       | -0.31       | -0.38       | -0.37       | -0.46        | -0.33 | 0.33  |             |             |             |      |      |  |
| summer_DryM(15)  | 0.14         | <b>0.82</b> | <b>0.89</b> | -0.45       | 0.68         | -0.16       | -0.60       | -0.25       | -0.54       | -0.49       | 0.17         | -0.69 | 0.77  | 0.71        |             |             |      |      |  |
| summer_wetM(16)  | -0.18        | -0.42       | 0.34        | 0.00        | -0.28        | -0.34       | 0.08        | -0.12       | 0.07        | 0.03        | <b>-0.85</b> | 0.27  | -0.32 | 0.72        | 0.02        |             |      |      |  |
| winter_P(17)     | 0.02         | 0.26        | <b>0.84</b> | -0.36       | 0.29         | -0.40       | -0.40       | -0.31       | -0.38       | -0.37       | -0.46        | -0.33 | 0.33  | <b>1.00</b> | 0.71        | 0.72        |      |      |  |
| winter_DryM(18)  | 0.14         | <b>0.82</b> | <b>0.89</b> | -0.45       | 0.68         | -0.16       | -0.60       | -0.25       | -0.54       | -0.49       | 0.17         | -0.69 | 0.77  | 0.71        | <b>1.00</b> | 0.02        | 0.71 |      |  |
| winter_wetM(19)  | -0.18        | -0.42       | 0.34        | 0.00        | -0.28        | -0.34       | 0.08        | -0.12       | 0.07        | 0.03        | <b>-0.85</b> | 0.27  | -0.32 | 0.72        | 0.02        | <b>1.00</b> | 0.72 | 0.02 |  |

**Table S8.** Climatic variables importance (given by its modeling power<sup>a</sup>) and contribution (given as correlation coefficients) to the principal components obtained in the three continents.

|                     | Variable importance |      |      | Component 1 |       |       | Component 2 |       |       | Component 3 |
|---------------------|---------------------|------|------|-------------|-------|-------|-------------|-------|-------|-------------|
|                     | USA                 | AUST | EUR  | USA         | AUST  | EUR   | USA         | AUST  | EUR   | AUST        |
| <b>AvMonTemp</b>    | 0.99                | 0.99 | 0.87 | 0.70        | 0.97  | 0.93  | -0.71       | -0.23 | 0.05  | 0.02        |
| <b>thermalAmp</b>   | 0.78                | 0.96 | 0.84 | -0.16       | -0.71 | -0.87 | 0.87        | 0.44  | -0.29 | 0.52        |
| <b>HotMonth</b>     | 0.77                | 0.98 | 0.55 | 0.84        | 0.97  | 0.69  | -0.23       | -0.19 | -0.28 | 0.08        |
| <b>ColdMonth</b>    | 0.97                | 0.99 | 0.95 | 0.54        | 0.96  | 0.97  | -0.83       | -0.26 | 0.12  | -0.06       |
| <b>summerSEASON</b> | 0.89                | 0.99 | 0.66 | 0.83        | 0.97  | 0.81  | -0.46       | -0.21 | -0.05 | 0.06        |
| <b>winterSEASON</b> | 0.99                | 0.99 | 0.94 | 0.57        | 0.97  | 0.96  | -0.82       | -0.24 | 0.11  | -0.02       |
| <b>monthabove10</b> | 0.90                | 0.80 | 0.91 | 0.50        | 0.78  | 0.95  | -0.81       | -0.02 | 0.07  | 0.44        |
| <b>MAP</b>          | 0.78                | 0.94 | 0.95 | -0.79       | -0.96 | -0.41 | -0.39       | -0.11 | -0.89 | -0.01       |
| <b>Cv</b>           | 0.95                | 0.83 | 0.99 | -0.54       | 0.70  | 0.96  | -0.81       | -0.36 | 0.26  | 0.46        |
| <b>DryMonth</b>     | 0.91                | 0.96 | 0.51 | 0.80        | 0.32  | -0.70 | 0.53        | 0.93  | -0.17 | -0.01       |
| <b>summer_P</b>     | 0.96                | 0.99 | 0.92 | 0.93        | 0.99  | -0.54 | 0.30        | 0.02  | 0.79  | -0.09       |
| <b>summer_DryM</b>  | 0.95                | 0.97 | 0.56 | 0.91        | 0.53  | -0.73 | 0.35        | 0.66  | 0.17  | 0.49        |
| <b>summer_wetM</b>  | 0.94                | 0.99 | 0.95 | 0.96        | 0.98  | 0.01  | 0.09        | 0.01  | 0.97  | -0.15       |
| <b>winter_P</b>     | 0.96                | 0.99 | 0.92 | 0.93        | 0.72  | -0.54 | 0.30        | 0.66  | 0.79  | -0.19       |
| <b>winter_DryM</b>  | 0.95                | 0.99 | 0.56 | 0.91        | 0.18  | -0.73 | 0.35        | 0.96  | 0.17  | -0.18       |
| <b>winter_wetM</b>  | 0.94                | 0.98 | 0.95 | 0.96        | 0.92  | 0.01  | 0.09        | 0.26  | 0.97  | -0.24       |

<sup>a</sup>A variable with a modeling power equal to one is completely relevant for building the PCA model. Variables with modeling power close to "number of components" divided by "number of variables" are regarded to be less significant.

**Table S9.** Principal Component Analysis for climatic variables in the three continents. USA: North America; AUST: Australia; EUR: Europe.

|             | <b>R<sup>2</sup>X</b> | <b>R<sup>2</sup>X (Cumul.)</b> | <b>Eigenvalues</b> | <b>Q<sup>2</sup></b> |
|-------------|-----------------------|--------------------------------|--------------------|----------------------|
| <b>USA</b>  |                       |                                |                    |                      |
| <b>1</b>    | 0.467734              | 0.467734                       | 10.75788           | 0.076350             |
| <b>2</b>    | 0.270011              | 0.737745                       | 6.21025            | 0.293118             |
| <b>AUST</b> |                       |                                |                    |                      |
| <b>1</b>    | 0.684061              | 0.684061                       | 10.94498           | 0.542123             |
| <b>2</b>    | 0.207512              | 0.891573                       | 3.32019            | 0.451575             |
| <b>3</b>    | 0.067786              | 0.959359                       | 1.08457            | 0.308800             |
| <b>EUR</b>  |                       |                                |                    |                      |
| <b>1</b>    | 0.546608              | 0.546608                       | 8.745728           | 0.217079             |
| <b>2</b>    | 0.268152              | 0.814760                       | 4.290434           | 0.277424             |
